# Supplementary material for: Long wavelength-sensing cones of zebrafish retina exhibit multiple layers of transcriptional heterogeneity
Source: Front Cell Neurosci. 2023 Jul 14;17:1214084. doi: 10.3389/fncel.2023.1214084 (PMC10382231; doi:10.3389/fncel.2023.1214084)
Supplement: Supplementary file 1 [file Data_Sheet_1.XLSX]

## Sheet: Sheet1
external_gene_name	gene_description	log2FC	AveExpr	adj.P.Val		LWS1-enriched transcripts, FDR<0.05.
gngt2a	guanine nucleotide binding protein (G protein), gamma transducing activity polypeptide 2a	-1.36672	12.8429	3.89668e-12
abcg4b	ATP-binding cassette, sub-family G (WHITE), member 4b	-3.03837	5.40779	2.55065e-06
nrip1a	nuclear receptor interacting protein 1a	-2.04606	5.81169	1.69163e-05
LOC566640	solute carrier family 22 member 8-like	-1.43989	7.60119	2.08014e-05
per1b	period circadian clock 1b	-1.04133	8.97845	2.08014e-05
slc25a22	solute carrier family 25 (mitochondrial carrier: glutamate), member 22	-1.5325	7.0812	2.72902e-05
cry1bb	cryptochrome circadian clock 1bb	-1.92388	5.92032	3.12286e-05
irf2bp2b	interferon regulatory factor 2 binding protein 2b	-1.92629	6.56247	0.000107447
snap25a	synaptosomal-associated protein, 25a	-1.40065	7.33218	0.000127413
zgc:109949	zgc:109949	-1.66423	5.57726	0.000154832
pcbp4	poly(rC) binding protein 4	-1.26295	7.08081	0.000234996
rapgef2	Rap guanine nucleotide exchange factor (GEF) 2	-1.07333	7.55303	0.000338886
neurod1	neuronal differentiation 1	-1.3581	7.76806	0.000382479
taok2a	TAO kinase 2a	-1.03578	7.70649	0.0006447
foxg1a	forkhead box G1a	-2.25344	4.14808	0.00073177
ppef2b	protein phosphatase with EF-hand domain 2b	-1.82645	5.21335	0.00073177
hmgb1b	high mobility group box 1b	-1.2662	6.92888	0.000749189
znf395a	zinc finger protein 395a	-2.99349	3.53403	0.000797526
aldoaa	aldolase a, fructose-bisphosphate, a	-1.01203	7.65043	0.00102088
myclb	MYCL proto-oncogene, bHLH transcription factor b	-2.10623	4.33185	0.00102717
oaz2b	ornithine decarboxylase antizyme 2b	-1.53764	6.69427	0.00120537
rimkla	ribosomal modification protein rimK-like family member A	-1.3148	6.55831	0.00127123
lonrf1l	LON peptidase N-terminal domain and ring finger 1, like	-1.40037	5.59913	0.00188805
gadd45ab	growth arrest and DNA-damage-inducible, alpha, b	-2.31335	3.88491	0.00200996
oip5-as1	oip5 antisense RNA 1	-1.02005	7.3275	0.00208173
per3	period circadian clock 3	-1.16867	6.42363	0.00219059
palmdb	palmdelphin b	-1.03715	7.07772	0.00219059
si:ch211-235e9.8	si:ch211-235e9.8	-1.1819	6.50296	0.00268075
odc1	ornithine decarboxylase 1	-1.00661	7.3219	0.00287611
plxna1a	plexin A1a	-1.29707	5.77011	0.00336701
dab1b	Dab, reelin signal transducer, homolog 1b (Drosophila)	-2.55274	3.61359	0.00344439
irf2bp2a	interferon regulatory factor 2 binding protein 2a	-1.21026	5.78989	0.00389305
mob2b	MOB kinase activator 2b	-1.13645	6.46423	0.00389305
otc	ornithine carbamoyltransferase	-1.38294	6.05219	0.00415091
si:ch211-117m20.4	si:ch211-117m20.4	-1.4064	5.58019	0.0042316
cdc42ep1b	CDC42 effector protein (Rho GTPase binding) 1b	-1.09763	6.12173	0.00441119
cited4b	Cbp/p300-interacting transactivator, with Glu/Asp-rich carboxy-terminal domain, 4b	-1.35086	5.47095	0.00444142
hipk2	homeodomain interacting protein kinase 2	-1.34334	5.75955	0.00453572
efna1a	ephrin-A1a	-1.36806	5.25007	0.00501811
msrb1a	methionine sulfoxide reductase B1a	-1.09957	6.15663	0.00501811
slc12a7a	solute carrier family 12 (potassium/chloride transporter), member 7a	-3.53118	1.92705	0.00508398
dnm1a	dynamin 1a	-1.02132	6.85774	0.00524634
neurod4	neuronal differentiation 4	-1.90268	4.09942	0.00562965
acvr1ba	activin A receptor, type IBa	-1.67671	4.36807	0.00562965
thrab	thyroid hormone receptor alpha b	-1.17058	5.61794	0.00562965
pkp1b	plakophilin 1b	-1.56174	4.61787	0.00643956
vash2	vasohibin 2	-1.20907	6.13449	0.00689128
LOC108190819	uncharacterized LOC108190819	-1.66961	4.16224	0.00834092
map2	microtubule-associated protein 2	-1.02987	6.575	0.0112411
nlgn4b	neuroligin 4b	-2.07195	3.5231	0.0112663
hmgb3a	high mobility group box 3a	-1.12235	5.64678	0.0119903
si:rp71-1h20.3	si:rp71-1h20.3	-2.07565	3.41822	0.0134475
ppp2r2bb	protein phosphatase 2, regulatory subunit B, beta b	-1.25709	4.71726	0.0137646
pfkfb4a	6-phosphofructo-2-kinase/fructose-2,6-biphosphatase 4a	-1.56608	4.17955	0.0140032
hipk3b	homeodomain interacting protein kinase 3b	-1.38319	4.55649	0.0140418
gpat2	glycerol-3-phosphate acyltransferase 2, mitochondrial	-1.17884	5.1353	0.0142552
clpxb	caseinolytic mitochondrial matrix peptidase chaperone subunit b	-1.28653	5.12143	0.0145521
si:ch211-243a15.1	si:ch211-243a15.1	-1.17261	5.20871	0.0158141
si:dkey-23c22.6	si:dkey-23c22.6	-1.03554	5.87668	0.0165072
camk1b	calcium/calmodulin-dependent protein kinase Ib	-1.28118	4.77731	0.0202464
nxnl2	nucleoredoxin-like 2	-1.12654	5.18804	0.0203063
cox8b	cytochrome c oxidase subunit 8b	-2.16047	3.22786	0.0208268
vwa2	von Willebrand factor A domain containing 2	-2.95211	2.32336	0.0216645
si:ch211-117m20.5	si:ch211-117m20.5	-1.31254	4.92766	0.0216645
ntm	neurotrimin	-1.72035	3.55467	0.0224659
zbtb4	zinc finger and BTB domain containing 4	-1.31186	4.73251	0.0241854
ampd2a	adenosine monophosphate deaminase 2a	-1.31944	4.62082	0.025017
rhobtb1	Rho-related BTB domain containing 1	-1.8837	3.1311	0.0252683
sugp1	SURP and G patch domain containing 1	-1.03721	6.25117	0.0253805
ext1a	exostosin glycosyltransferase 1a	-1.47705	4.12026	0.0279226
gys1	glycogen synthase 1 (muscle)	-1.30211	5.37059	0.0279302
hdac5	histone deacetylase 5	-1.56978	4.01603	0.0284198
atr	ATR serine/threonine kinase	-1.22566	6.3833	0.0290567
pitpnb	phosphatidylinositol transfer protein, beta	-1.24784	4.58358	0.0295124
chst14	carbohydrate (N-acetylgalactosamine 4-0) sulfotransferase 14	-1.94843	3.23868	0.0297715
rorcb	RAR-related orphan receptor C b	-1.66891	3.1524	0.0303608
paplnb	papilin b, proteoglycan-like sulfated glycoprotein	-1.93965	3.31602	0.0323862
kcnk1a	potassium channel, subfamily K, member 1a	-1.84957	3.11761	0.0332341
cep126	centrosomal protein 126	-1.43501	4.17538	0.0332834
diras1b	DIRAS family, GTP-binding RAS-like 1b	-1.4592	3.6223	0.0338722
vax1	ventral anterior homeobox 1	-2.44783	2.6995	0.0341411
si:ch1073-272o11.3	si:ch1073-272o11.3	-1.57057	3.5948	0.0347152
mycla	MYCL proto-oncogene, bHLH transcription factor a	-2.76917	1.79951	0.0358229
abcc13	ATP-binding cassette, sub-family C (CFTR/MRP), member 13	-3.18228	1.60889	0.0361489
LOC559907	proto-oncogene DBL-like	-1.13478	5.04704	0.0381494
zgc:194659	zgc:194659	-1.20586	4.88912	0.0389042
ablim3	actin binding LIM protein family, member 3	-1.2249	6.88323	0.0407375
gabrg2	gamma-aminobutyric acid (GABA) A receptor, gamma 2	-2.35118	2.70335	0.0408405
cdip1	cell death-inducing p53 target 1	-1.16484	4.63876	0.0432794
LOC108179178	gastrula zinc finger protein XlCGF8.2DB-like	-1.38405	4.12687	0.0447245
tnfrsf19	tumor necrosis factor receptor superfamily, member 19	-1.98116	2.83515	0.0451611
cpt1b	carnitine palmitoyltransferase 1B (muscle)	-2.31404	3.10626	0.0458197
si:ch211-197l9.2	si:ch211-197l9.2	-1.4283	5.9201	0.0467445
rev1	REV1, polymerase (DNA directed)	-1.08338	4.92186	0.0482975
ppp2r3c	protein phosphatase 2, regulatory subunit B'', gamma	-1.08511	4.94091	0.0484103

## Sheet: Sheet2
external_gene_name	gene_description	log2FC	AveExpr	adj.P.Val		LWS2-enriched transcripts, FDR<0.05.
psmb1	proteasome subunit beta 1	2.39001	7.07607	1.09054e-06
psma4	proteasome subunit alpha 4	2.21087	7.17696	2.55065e-06
psmb3	proteasome subunit beta 3	2.20528	7.37578	2.55065e-06
psmb4	proteasome subunit beta 4	1.97498	7.60785	2.55065e-06
psmd13	proteasome 26S subunit, non-ATPase 13	2.25211	6.79258	2.99642e-06
psmb7	proteasome subunit beta 7	1.92469	7.53945	3.10707e-06
psma3	proteasome subunit alpha 3	1.72959	7.81491	5.05482e-06
psmb2	proteasome subunit beta 2	2.09596	7.12229	5.3425e-06
zgc:56493	zgc:56493	1.53059	8.13056	6.31413e-06
ufd1l	ubiquitin fusion degradation 1 like (yeast)	1.89126	7.54391	8.96549e-06
thop1	thimet oligopeptidase 1	1.79459	7.5286	8.96549e-06
grk1b	G protein-coupled receptor kinase 1 b	1.26818	9.09531	9.83373e-06
psmc5	proteasome 26S subunit, ATPase 5	1.61284	7.69902	1.06179e-05
shfm1	split hand/foot malformation (ectrodactyly) type 1	1.56212	8.14446	1.06179e-05
ppdpfa	pancreatic progenitor cell differentiation and proliferation factor a	1.13255	11.5575	1.15178e-05
fkbp3	FK506 binding protein 3	1.95724	7.01871	1.15298e-05
gnl3l	guanine nucleotide binding protein-like 3 (nucleolar)-like	2.33925	8.14169	1.5961e-05
psmb6	proteasome subunit beta 6	2.00193	7.34204	1.80555e-05
LOC562466	cyclic nucleotide-gated cation channel beta-3-like	1.72922	7.76949	1.80555e-05
calm1b	calmodulin 1b	2.01139	6.5906	2.08014e-05
cacna2d4b	calcium channel, voltage-dependent, alpha 2/delta subunit 4b	8.31688	3.7466	2.42762e-05
vdac2	voltage-dependent anion channel 2	1.02774	9.6522	2.69706e-05
tex9	testis expressed 9	3.42637	5.23908	3.11824e-05
clu	clusterin	1.55297	7.69991	3.11824e-05
LOC100535624	uncharacterized LOC100535624	3.25545	5.55595	3.13132e-05
psmb5	proteasome subunit beta 5	1.41226	7.8825	3.39002e-05
apln	apelin	2.02281	6.60062	3.40921e-05
psma6a	proteasome subunit alpha 6a	2.05775	6.27179	4.06637e-05
si:dkey-100n23.5	si:dkey-100n23.5	1.54545	7.27491	5.87544e-05
psmd12	proteasome 26S subunit, non-ATPase 12	1.5217	7.08528	6.39387e-05
psma2	proteasome subunit alpha 2	1.83536	6.32121	6.58841e-05
psma6b	proteasome subunit alpha 6b	1.72545	6.74187	6.66658e-05
zgc:173594	zgc:173594	3.70353	6.65031	7.51887e-05
psmc1b	proteasome 26S subunit, ATPase 1b	1.87155	5.93761	7.51887e-05
psmc4	proteasome 26S subunit, ATPase 4	1.53956	7.13865	7.51887e-05
psma8	proteasome subunit alpha 8	1.36832	7.70981	7.51887e-05
psmc3	proteasome 26S subunit, ATPase 3	1.66134	6.43711	8.40842e-05
si:rp71-45k5.4	si:rp71-45k5.4	1.91359	6.19429	8.79027e-05
psmd3	proteasome 26S subunit, non-ATPase 3	1.53725	6.76821	0.000106668
txn	thioredoxin	4.12825	3.57702	0.000141326
psmc1a	proteasome 26S subunit, ATPase 1a	1.51762	6.95279	0.000148181
pomp	proteasome maturation protein	1.37163	7.39555	0.000148181
ddit3	DNA-damage-inducible transcript 3	1.83386	6.04905	0.000158421
adgrl3.1	adhesion G protein-coupled receptor L3.1	1.60345	6.51765	0.00021298
gngt2b	guanine nucleotide binding protein (G protein), gamma transducing activity polypeptide 2b	1.84984	13.1971	0.000231058
elovl8a	ELOVL fatty acid elongase 8a	1.74912	6.21882	0.000231549
kera	keratocan	1.0141	8.51499	0.000257828
nsfl1c	NSFL1 (p97) cofactor (p47)	1.53502	6.33133	0.000271163
psmd7	proteasome 26S subunit, non-ATPase 7	1.4125	6.70371	0.000334504
psmd6	proteasome 26S subunit, non-ATPase 6	1.31537	7.5	0.000356526
psmd4b	proteasome 26S subunit, non-ATPase 4b	1.66169	5.93352	0.000414715
pfkpa	phosphofructokinase, platelet a	1.1741	7.61862	0.000423823
psmd14	proteasome 26S subunit, non-ATPase 14	1.43111	6.64228	0.000520286
psmc2	proteasome 26S subunit, ATPase 2	1.25197	7.15615	0.000520286
ube2v1	ubiquitin-conjugating enzyme E2 variant 1	1.42728	7.02834	0.000574567
fam57ba	family with sequence similarity 57, member Ba	1.23203	7.16682	0.000609953
psmd1	proteasome 26S subunit, non-ATPase 1	1.4744	6.71084	0.000625514
septo15	selenoprotein 15	1.43021	6.44189	0.00073177
nme2a	NME/NM23 nucleoside diphosphate kinase 2a	1.03991	7.97325	0.00073177
jagn1b	jagunal homolog 1b	1.34697	7.22839	0.000796823
pabpc1a	poly(A) binding protein, cytoplasmic 1a	1.17007	9.63536	0.000796823
ppib	peptidylprolyl isomerase B (cyclophilin B)	1.05223	7.86576	0.000796823
chst2a	carbohydrate (N-acetylglucosamine-6-O) sulfotransferase 2a	1.09117	7.6308	0.000872732
atox1	antioxidant 1 copper chaperone	2.73507	4.71949	0.00107998
slc32a1	solute carrier family 32 (GABA vesicular transporter), member 1	1.53083	6.17636	0.00108344
si:ch211-261c8.5	si:ch211-261c8.5	4.10416	3.80922	0.00112337
nfs1	NFS1 cysteine desulfurase	1.18908	6.91007	0.00122968
dynll1	dynein, light chain, LC8-type 1	1.89576	5.95483	0.00127123
psmd11b	proteasome 26S subunit, non-ATPase 11b	1.71857	5.72121	0.00139945
psmd8	proteasome 26S subunit, non-ATPase 8	1.08466	7.38407	0.00139945
tpd52l2a	tumor protein D52-like 2a	1.28686	7.35382	0.00153875
usp8	ubiquitin specific peptidase 8	3.29979	3.54458	0.00186558
pik3r3b	phosphoinositide-3-kinase, regulatory subunit 3b (gamma)	1.06729	7.50891	0.00186558
psmc6	proteasome 26S subunit, ATPase 6	1.12742	7.1003	0.00188805
nptna	neuroplastin a	2.22425	4.48715	0.0020374
si:ch73-28h20.1	si:ch73-28h20.1	1.30472	6.46526	0.00220832
eif5b	eukaryotic translation initiation factor 5B	1.76494	6.95894	0.00223737
hspa4a	heat shock protein 4a	1.19119	7.00536	0.00238693
nr2f2	nuclear receptor subfamily 2, group F, member 2	1.69394	6.27721	0.00244042
psma5	proteasome subunit alpha 5	1.26637	6.48459	0.00250879
zgc:136826	zgc:136826	4.21873	3.46469	0.00287611
htt	huntingtin	1.26255	6.4494	0.00287611
selt2	selenoprotein T, 2	1.02878	8.37704	0.00287611
arid3b	AT rich interactive domain 3B (BRIGHT-like)	2.12844	4.8187	0.00314667
fkbp2	FK506 binding protein 2	1.0562	7.28915	0.00314667
rpl28	ribosomal protein L28	1.14271	6.93548	0.00340278
eif5a2	eukaryotic translation initiation factor 5A2	1.03753	7.69626	0.00389305
ctsba	cathepsin Ba	1.34597	6.27723	0.00427158
ciapin1	cytokine induced apoptosis inhibitor 1	1.23284	6.32621	0.00449125
psmg4	proteasome (prosome, macropain) assembly chaperone 4	2.11882	4.8543	0.00451443
mgst3b	microsomal glutathione S-transferase 3b	1.70521	5.22326	0.00461969
lactbl1a	lactamase, beta-like 1a	1.03285	7.3255	0.00464746
faim2b	Fas apoptotic inhibitory molecule 2b	1.55823	5.71145	0.00482596
sox4a	SRY (sex determining region Y)-box 4a	2.35781	5.70326	0.00501822
jun	jun proto-oncogene	2.65677	5.89269	0.00524634
psmd11a	proteasome 26S subunit, non-ATPase 11a	1.38961	5.56765	0.00524634
nudc	nudC nuclear distribution protein	1.34114	5.89907	0.00543633
sb:cb829	sb:cb829	2.85033	4.26701	0.00556825
uspl1	ubiquitin specific peptidase like 1	2.44967	4.67349	0.00562965
nedd8	neural precursor cell expressed, developmentally down-regulated 8	1.14506	6.51867	0.00562965
atf5a	activating transcription factor 5a	2.47017	4.30794	0.00597422
triob	trio Rho guanine nucleotide exchange factor b	1.6865	5.19091	0.00620769
mapk8ip3	mitogen-activated protein kinase 8 interacting protein 3	2.24918	4.64262	0.00626756
ndufa7	NADH dehydrogenase (ubiquinone) 1 alpha subcomplex, 7	1.01073	7.30547	0.00626756
impa1	inositol(myo)-1(or 4)-monophosphatase 1	1.75615	4.77209	0.00642907
vmp1	vacuole membrane protein 1	1.91123	4.38017	0.00674603
prcp	prolylcarboxypeptidase (angiotensinase C)	3.75196	4.10993	0.00687847
LOC108182857	uncharacterized LOC108182857	1.8185	5.0058	0.00760679
psma1	proteasome subunit alpha 1	1.25442	7.38476	0.00775174
txnrd1	thioredoxin reductase 1	1.09988	6.36785	0.00775174
zgc:92066	zgc:92066	1.53061	5.23611	0.00854762
dgkzb	diacylglycerol kinase, zeta b	1.20773	6.27776	0.00860406
bmb	brambleberry	5.26095	1.48581	0.0100204
ppt1	palmitoyl-protein thioesterase 1 (ceroid-lipofuscinosis, neuronal 1, infantile)	1.43622	6.04151	0.0100204
nr4a3	nuclear receptor subfamily 4, group A, member 3	2.09918	5.81754	0.0102697
si:dkey-181f22.4	si:dkey-181f22.4	2.59473	3.38667	0.0104814
zgc:158785	zgc:158785	1.03091	7.03903	0.0105107
usp14	ubiquitin specific peptidase 14 (tRNA-guanine transglycosylase)	1.64213	4.84588	0.0112411
ift27	intraflagellar transport 27 homolog (Chlamydomonas)	1.58139	5.11972	0.0112411
eef1a1l1	eukaryotic translation elongation factor 1 alpha 1, like 1	1.14616	10.1709	0.0112411
sqstm1	sequestosome 1	2.30196	6.74542	0.0119556
osbp2	oxysterol binding protein 2	3.69045	3.73617	0.0135149
blmh	bleomycin hydrolase	1.52463	4.87739	0.0137646
tktb	transketolase b	2.5227	5.40935	0.0144042
limch1b	LIM and calponin homology domains 1b	1.46951	6.09541	0.0144569
zgc:162193	zgc:162193	6.20973	2.02568	0.0145521
ckba	creatine kinase, brain a	3.1691	5.50809	0.0145521
cst14a.2	cystatin 14a, tandem duplicate 2	1.7056	4.5994	0.0158626
mrpl30	mitochondrial ribosomal protein L30	1.10246	5.91589	0.0165072
soga3b	SOGA family member 3b	4.20316	2.3586	0.0165905
mrpl35	mitochondrial ribosomal protein L35	1.11271	6.03791	0.0168037
uckl1b	uridine-cytidine kinase 1-like 1b	5.97714	2.811	0.0172298
tmem147	transmembrane protein 147	1.02946	6.3353	0.0172304
chmp5b	charged multivesicular body protein 5b	1.05146	6.13108	0.0189799
bola3	bolA family member 3	1.31868	5.55412	0.0192318
pik3cb	phosphatidylinositol-4,5-bisphosphate 3-kinase, catalytic subunit beta	4.39483	2.02268	0.0202464
rab39bb	RAB39B, member RAS oncogene family b	3.09023	3.39105	0.0204949
spcs1	signal peptidase complex subunit 1	1.0457	6.24956	0.0208268
mtus1a	microtubule associated tumor suppressor 1a	2.3782	3.81884	0.0208985
surf4	surfeit gene 4	1.37055	5.61842	0.0209008
tmem229b	transmembrane protein 229B	1.3913	5.08363	0.0212049
anapc13	anaphase promoting complex subunit 13	1.21911	5.39738	0.0219115
fancg	Fanconi anemia, complementation group G	1.59712	4.60621	0.0228538
tuba8l2	tubulin, alpha 8 like 2	1.64341	4.75888	0.0234777
eif4e1c	eukaryotic translation initiation factor 4E family member 1c	1.46315	5.01675	0.0235254
impdh2	IMP (inosine 5'-monophosphate) dehydrogenase 2	1.51875	4.72142	0.0237463
psme1	proteasome activator subunit 1	6.05988	3.10388	0.0240073
acy3.1	aspartoacylase (aminocyclase) 3, tandem duplicate 1	3.25807	2.8821	0.0253805
tpgs2	tubulin polyglutamylase complex subunit 2	1.56249	4.55396	0.0262457
kri1	KRI1 homolog	1.5541	5.11394	0.0271823
syt4	synaptotagmin IV	7.88623	3.67438	0.0279899
smim20	small integral membrane protein 20	3.0489	3.5221	0.0279899
mfsd2ab	major facilitator superfamily domain containing 2ab	2.05125	4.12952	0.0279899
gfm1	G elongation factor, mitochondrial 1	1.02678	6.01072	0.0280962
stox2a	storkhead box 2a	1.82762	4.50342	0.028404
rangap1b	Ran GTPase activating protein 1b	1.45975	4.74388	0.0297715
lyrm4	LYR motif containing 4	1.33169	5.0025	0.0297715
aspscr1	alveolar soft part sarcoma chromosome region, candidate 1	1.74389	4.03981	0.0311641
oplah	5-oxoprolinase (ATP-hydrolysing)	1.23915	5.37271	0.0319321
osbp	oxysterol binding protein	5.80009	2.27751	0.0327891
zgc:109934	zgc:109934	4.83497	1.4732	0.0332341
zgc:77650	zgc:77650	1.13905	5.21272	0.0333987
snx18a	sorting nexin 18a	1.86447	4.08585	0.0337016
si:ch211-68a17.7	si:ch211-68a17.7	1.28645	4.89144	0.0343727
nploc4	NPL4 homolog, ubiquitin recognition factor	1.02089	5.59501	0.0360761
nab2	NGFI-A binding protein 2 (EGR1 binding protein 2)	1.36775	4.98464	0.0370248
ypel2a	yippee-like 2a	1.09144	5.95062	0.0370248
psmd10	proteasome 26S subunit, non-ATPase 10	2.83711	3.40649	0.0371819
pcm1	pericentriolar material 1	2.65925	3.85012	0.0387123
lmna	lamin A	4.76525	1.10188	0.0389042
psmd5	proteasome 26S subunit, non-ATPase 5	1.27727	5.12433	0.0405746
nifk	nucleolar protein interacting with the FHA domain of MKI67	1.4547	4.34137	0.0407375
si:ch211-132f19.7	si:ch211-132f19.7	1.10632	5.59884	0.0407375
tsr1	TSR1, 20S rRNA accumulation, homolog (S. cerevisiae)	1.38295	4.57338	0.0415027
pin4	protein (peptidylprolyl cis/trans isomerase) NIMA-interacting, 4 (parvulin)	1.30386	4.93785	0.0428966
pnkp	polynucleotide kinase 3'-phosphatase	1.75698	3.92752	0.0432794
st6gal2a	ST6 beta-galactosamide alpha-2,6-sialyltranferase 2a	1.55552	4.39283	0.0443128
tp53	tumor protein p53	1.11851	5.51556	0.0459089
hbaa1	hemoglobin, alpha adult 1	6.09501	1.88359	0.0472465
LOC100535353	protein CutA homolog	1.36518	4.9082	0.0475131
b3glcta	beta 3-glucosyltransferase a	2.34712	3.64733	0.0476587
rabep2	rabaptin, RAB GTPase binding effector protein 2	1.13577	5.17908	0.0480158
si:ch1073-100f3.2	si:ch1073-100f3.2	2.10899	3.02795	0.0484103
eml2	echinoderm microtubule associated protein like 2	1.30263	5.44301	0.0487795
heatr3	HEAT repeat containing 3	2.29914	3.2063	0.0495861
klhl32	kelch-like family member 32	1.67811	3.85484	0.0497689
