# Supplementary material for: Long wavelength-sensing cones of zebrafish retina exhibit multiple layers of transcriptional heterogeneity
Source: Front Cell Neurosci. 2023 Jul 14;17:1214084. doi: 10.3389/fncel.2023.1214084 (PMC10382231; doi:10.3389/fncel.2023.1214084)
Supplement: Supplementary file 2 [file Data_Sheet_2.XLSX]

## Sheet: Sheet1
SYMBOL	GENENAME	moderatedL2FC	baseMean	padj		LWS1-enriched, moderated log2FC, FDR<0.05
rps13	ribosomal protein S13	22.5838	45.1981	3.8819e-06
ltbp1	latent transforming growth factor beta binding protein 1	5.68401	8.62171	0.000127943
hmgb1b	high mobility group box 1b	1.46461	140.42	0.000134756
abcg4b	ATP-binding cassette, sub-family G (WHITE), member 4b	2.65226	35.1918	0.000184909
gngt2a	guanine nucleotide binding protein (G protein), gamma transducing activity polypeptide 2a	1.58634	678.768	0.000276363
ppt2	palmitoyl-protein thioesterase 2	3.10658	23.3475	0.000287915
tmem170a	transmembrane protein 170A	2.46458	9.47505	0.000338318
kmt2ca	lysine (K)-specific methyltransferase 2Ca	2.96466	92.195	0.000562222
med14	mediator complex subunit 14	3.01402	23.3728	0.000625045
ddr1	discoidin domain receptor tyrosine kinase 1	3.25128	13.0658	0.00073636
znf395a	zinc finger protein 395a	2.53196	12.9112	0.00073636
tlk1a	tousled-like kinase 1a	2.28461	40.0583	0.000879847
rgs12a	regulator of G protein signaling 12a	3.40179	15.1991	0.00102911
ivd	isovaleryl-CoA dehydrogenase	1.88732	58.4664	0.00102911
svila	supervillin a	2.00129	99.4319	0.00105893
aldoaa	aldolase a, fructose-bisphosphate, a	1.34001	287.977	0.00155164
intu	inturned planar cell polarity protein	3.07274	12.213	0.00161517
tmem56b	transmembrane protein 56b	3.04011	6.79789	0.00201396
mtrr	5-methyltetrahydrofolate-homocysteine methyltransferase reductase	2.68671	12.6023	0.00201396
myclb	MYCL proto-oncogene, bHLH transcription factor b	2.20721	27.1123	0.00201396
si:dkey-91i10.3	si:dkey-91i10.3	3.72402	3.38954	0.00209419
si:ch211-117m20.4	si:ch211-117m20.4	2.25004	43.4159	0.00253017
abhd12	abhydrolase domain containing 12	1.28072	78.894	0.00258029
cldn11a	claudin 11a	3.15038	10.8595	0.00337941
sybu	syntabulin (syntaxin-interacting)	1.79723	65.2164	0.00357897
ppp2r3c	protein phosphatase 2, regulatory subunit B'', gamma	1.73189	28.9052	0.00383514
sqor	sulfide quinone oxidoreductase	1.89263	13.4651	0.00419849
p4ha2	procollagen-proline, 2-oxoglutarate 4-dioxygenase (proline 4-hydroxylase), alpha polypeptide 2	2.05519	13.4573	0.0044183
mb	myoglobin	2.37636	17.2806	0.00518561
g0s2	G0/G1 switch 2	2.2717	39.3592	0.0056583
bhlhe23	basic helix-loop-helix family, member e23	2.73609	7.81398	0.00591037
snrnp40	small nuclear ribonucleoprotein 40 (U5)	1.95749	14.3001	0.00591037
quo	quattro	2.4513	7.68739	0.00675481
slc25a55a	solute carrier family 25, member 55a	1.44363	181.294	0.00697631
lgr4	leucine-rich repeat containing G protein-coupled receptor 4	1.99965	12.2896	0.00704994
lnpk	lunapark, ER junction formation factor	1.9762	17.0942	0.00713147
gngt2a	guanine nucleotide binding protein (G protein), gamma transducing activity polypeptide 2a	1.30112	2266.14	0.00797981
ahcyl1	adenosylhomocysteinase-like 1	1.23035	59.2754	0.00797981
itsn2a	intersectin 2a	2.55434	7.22615	0.00838868
snapc3	small nuclear RNA activating complex, polypeptide 3	1.9841	16.604	0.00844121
slc12a7a	solute carrier family 12 (potassium/chloride transporter), member 7a	2.25607	5.42459	0.00848788
esd	esterase D/formylglutathione hydrolase	1.90962	43.2096	0.00848788
atp6v1b2	ATPase H+ transporting V1 subunit B2	1.3866	22.131	0.00877718
phrf1	PHD and ring finger domains 1	1.76473	39.5566	0.00896677
pcbp4	poly(rC) binding protein 4	1.36787	83.177	0.00944104
sacm1la	SAC1 like phosphatidylinositide phosphatase a	1.39255	42.1192	0.00982845
mical3a	microtubule associated monooxygenase, calponin and LIM domain containing 3a	2.34424	30.8166	0.0102567
syt9b	synaptotagmin IXb	2.26987	4.66699	0.0121641
si:dkey-222f8.3	si:dkey-222f8.3	2.32553	6.7737	0.0122858
caskin1	CASK interacting protein 1	1.99023	15.509	0.0122858
gpatch11	G patch domain containing 11	1.80033	16.4893	0.0135783
tmem259	transmembrane protein 259	1.28637	28.0045	0.0135783
ppat	phosphoribosyl pyrophosphate amidotransferase	2.2428	4.34773	0.0138293
arnt2	aryl-hydrocarbon receptor nuclear translocator 2	1.58067	24.148	0.0140155
amot	angiomotin	2.15914	4.70081	0.015049
LOC100535070	adhesion G protein-coupled receptor L2-like	1.75055	17.5778	0.015049
opn1lw1	opsin 1 (cone pigments), long-wave-sensitive, 1	1.51559	6706.55	0.015049
pcyox1l	prenylcysteine oxidase 1 like	2.10169	23.2261	0.0153791
gadd45ab	growth arrest and DNA-damage-inducible, alpha, b	1.74528	16.9007	0.0156963
ehmt1b	euchromatic histone-lysine N-methyltransferase 1b	1.788	59.3916	0.0164722
tmem41aa	transmembrane protein 41aa	2.08011	5.36537	0.016686
rasgrp4	RAS guanyl releasing protein 4	1.91106	22.3272	0.0167921
srsf1a	serine/arginine-rich splicing factor 1a	1.23716	186.606	0.0169284
mycla	MYCL proto-oncogene, bHLH transcription factor a	1.92725	14.7023	0.017809
mbd3b	methyl-CpG binding domain protein 3b	1.90331	8.34701	0.0192877
klhl7	kelch-like family member 7	1.88847	5.66734	0.0192877
meis2a	Meis homeobox 2a	1.88219	7.53149	0.0192877
tpst1	tyrosylprotein sulfotransferase 1	1.74652	22.2239	0.0192877
ldb3a	LIM domain binding 3a	1.48916	32.5467	0.0192877
nxnl2	nucleoredoxin like 2	1.31393	66.9953	0.0192877
rps6kc1	ribosomal protein S6 kinase polypeptide 1	1.25809	39.6698	0.0193454
ccnd1	cyclin D1	1.94553	14.7393	0.020406
tagapb	T cell activation RhoGTPase activating protein b	1.81448	37.5518	0.0206436
wdtc1	WD and tetratricopeptide repeats 1	1.53121	51.1819	0.0227178
bbs7	Bardet-Biedl syndrome 7	1.06707	84.4717	0.0227178
eif4g3b	eukaryotic translation initiation factor 4 gamma, 3b	1.72737	40.4759	0.0234413
ifi30	interferon, gamma-inducible protein 30	1.82553	21.9801	0.0245276
acap1	ArfGAP with coiled-coil, ankyrin repeat and PH domains 1	1.60773	4.2462	0.0248577
st5	suppression of tumorigenicity 5	1.66744	12.877	0.0251066
cgnb	cingulin b	1.64751	26.1609	0.0251066
rhol	rhodopsin, like	1.44191	237.662	0.0251066
tkta	transketolase a	1.11861	362.387	0.0251066
si:ch73-1a9.3	si:ch73-1a9.3	0.926384	782.7	0.0251066
marco	macrophage receptor with collagenous structure	1.79898	9.53591	0.0259168
mcoln1a	mucolipin 1a	1.49102	15.7128	0.026195
rtel1	regulator of telomere elongation helicase 1	1.64102	7.65273	0.0268574
ckmt2b	creatine kinase, mitochondrial 2b (sarcomeric)	1.09264	780.608	0.0285758
rcc2	regulator of chromosome condensation 2	1.71426	28.7436	0.0287216
polg2	polymerase (DNA directed), gamma 2, accessory subunit	1.62646	6.5497	0.0287216
si:ch211-206k20.5	si:ch211-206k20.5	1.13908	28.2308	0.0287216
ccng2	cyclin G2	1.57113	31.6116	0.0289978
hnrnph1	heterogeneous nuclear ribonucleoprotein H1	1.42646	22.2527	0.0298807
furina	furin (paired basic amino acid cleaving enzyme) a	1.58985	27.525	0.0305074
akt3b	v-akt murine thymoma viral oncogene homolog 3b	1.61066	10.8707	0.0310051
sptlc2a	serine palmitoyltransferase, long chain base subunit 2a	1.65137	5.50144	0.0311469
stat1a	signal transducer and activator of transcription 1a	1.48333	35.1888	0.0311469
cd81a	CD81 molecule a	1.4157	87.0507	0.0313657
unc119.2	unc-119 lipid binding chaperone B homolog 2	1.1535	72.2447	0.0314894
NA	NA	1.67168	10.0342	0.0315373
sowahab	sosondowah ankyrin repeat domain family member Ab	1.67155	8.29436	0.0316223
rbfox2	RNA binding fox-1 homolog 2	1.64104	9.2497	0.0327607
pola1	polymerase (DNA directed), alpha 1	1.46681	9.60471	0.0327607
acvr1ba	activin A receptor type 1Ba	1.46187	27.5466	0.0327607
jmjd1cb	jumonji domain containing 1Cb	1.44668	84.7485	0.0333084
pik3c2b	phosphatidylinositol-4-phosphate 3-kinase, catalytic subunit type 2 beta	1.61764	14.5208	0.0338972
s100a10b	S100 calcium binding protein A10b	1.40707	161.928	0.0338972
atrip	ATR interacting protein	1.44958	16.226	0.0340641
slc35b4	solute carrier family 35, member B4	1.294	26.9202	0.0341964
zgc:77739	zgc:77739	1.56499	9.88681	0.0364242
ets2	v-ets avian erythroblastosis virus E26 oncogene homolog 2	1.37678	31.8669	0.0368509
dynll2a	dynein, light chain, LC8-type 2a	1.58317	5.35734	0.0369976
mdc1	mediator of DNA damage checkpoint 1	1.56278	6.64728	0.0369976
b3galt6	UDP-Gal:betaGal beta 1,3-galactosyltransferase polypeptide 6	1.42921	7.70387	0.0369976
atg13	ATG13 autophagy related 13 homolog (S. cerevisiae)	0.904168	115.381	0.0369976
washc4	WASH complex subunit 4	1.34321	17.6793	0.0379496
bcl10	B cell CLL/lymphoma 10	1.48591	11.4003	0.0382956
sypb	synaptophysin b	0.55099	822.582	0.0385149
LOC566640	solute carrier family 22 member 6-like	1.22785	714.894	0.0396165
zbtb4	zinc finger and BTB domain containing 4	1.20184	42.2466	0.0398557
nr2f5	nuclear receptor subfamily 2, group F, member 5	1.47774	12.5852	0.0398778
mid2	midline 2	1.40635	3.77716	0.0398778
cep126	centrosomal protein 126	1.42543	59.184	0.0408157
nmt2	N-myristoyltransferase 2	1.16214	24.3387	0.0413035
parvb	parvin, beta	1.49448	7.39254	0.0414738
gemin8	gem (nuclear organelle) associated protein 8	1.46113	12.8508	0.0414738
cox8b	cytochrome c oxidase subunit 8B	1.38988	27.8806	0.0434005
ak4	adenylate kinase 4	1.3088	19.5338	0.0439042
exoc1	exocyst complex component 1	1.37079	43.4994	0.0440248
grik1a	glutamate receptor, ionotropic, kainate 1a	1.42748	11.9582	0.0441525
vps54	vacuolar protein sorting 54 homolog (S. cerevisiae)	1.22224	26.0986	0.0441525
mapk7	mitogen-activated protein kinase 7	1.11279	24.4504	0.0441525
hmgcl	3-hydroxy-3-methylglutaryl-CoA lyase	1.00272	49.8704	0.0441525
cdc14ab	cell division cycle 14Ab	0.861556	129.466	0.0441525
fxyd6l	FXYD domain containing ion transport regulator 6 like	1.31165	226.188	0.0447435
irf2bp2b	interferon regulatory factor 2 binding protein 2b	0.983502	167.77	0.0451574
celf3b	cugbp, Elav-like family member 3b	1.41921	8.33247	0.0494029

## Sheet: Sheet2
SYMBOL	GENENAME	moderatedL2FC	baseMean	padj		LWS2-enriched, moderated log2FC, FDR<0.05
sqstm1	sequestosome 1	-2.41236	91.0712	4.21744e-09
syt4	synaptotagmin IV	-5.16596	22.9597	6.12606e-07
psmb1	proteasome subunit beta 1	-2.38535	121.4	3.8819e-06
gnl3l	guanine nucleotide binding protein-like 3 (nucleolar)-like	-2.41526	40.1748	3.8819e-06
psma4	proteasome subunit alpha 4	-1.86713	92.7342	6.51024e-06
psmb3	proteasome subunit beta 3	-1.84939	154.36	2.07981e-05
nr2f2	nuclear receptor subfamily 2, group F, member 2	-1.86895	73.1634	2.07981e-05
NA	NA	-16.0945	7.02466	2.8354e-05
calm1b	calmodulin 1b	-1.36798	95.7218	0.000116846
rps27l	ribosomal protein S27 like	-3.4044	19.6822	0.000127943
txn	thioredoxin	-3.9518	19.8869	0.000127943
psmd14	proteasome 26S subunit, non-ATPase 14	-1.50821	73.7219	0.000147796
phlda3	pleckstrin homology-like domain, family A, member 3	-5.44163	4.43778	0.000147796
zgc:56493	zgc:56493	-1.3904	205.161	0.000184909
ckba	creatine kinase, brain a	-2.65248	14.497	0.000184909
qdpra	quinoid dihydropteridine reductase a	-2.95116	10.6989	0.00021238
psmc4	proteasome 26S subunit, ATPase 4	-1.54494	89.5505	0.000214952
fthl31	ferritin, heavy polypeptide-like 31	-2.77111	75.0738	0.000287915
psmd13	proteasome 26S subunit, non-ATPase 13	-2.17342	85.1523	0.000293939
LOC100006428	ferritin, middle subunit-like	-4.18692	17.7874	0.000588538
nsfl1c	NSFL1 (p97) cofactor (p47)	-1.46421	73.5241	0.000639333
psmb2	proteasome subunit beta 2	-1.6227	141.154	0.000647818
sox4a	SRY (sex determining region Y)-box 4a	-2.08756	66.147	0.000864979
tdrd7b	tudor domain containing 7 b	-1.98773	62.8025	0.000879847
mapk8ip3	mitogen-activated protein kinase 8 interacting protein 3	-1.93503	42.9655	0.0010383
zgc:103625	zgc:103625	-2.10734	69.9345	0.00104128
arid3b	AT rich interactive domain 3B (BRIGHT-like)	-1.67196	41.766	0.00184716
smim20	small integral membrane protein 20	-2.15147	27.3508	0.00211997
psmd7	proteasome 26S subunit, non-ATPase 7	-1.43895	74.8135	0.00216069
sox11b	SRY (sex determining region Y)-box 11b	-3.07557	17.4626	0.00216069
tex9	testis expressed 9	-2.33535	23.7572	0.00221658
fthl28	ferritin, heavy polypeptide-like 28	-2.39413	21.6083	0.00233545
LOC110438491	putative ribonuclease	-2.79077	15.0362	0.00249772
psma6a	proteasome subunit alpha 6a	-1.66264	70.8027	0.00299349
psmd1	proteasome 26S subunit, non-ATPase 1	-1.67227	86.9698	0.00351793
psmc3	proteasome 26S subunit, ATPase 3	-1.49844	91.1564	0.00438639
htt	huntingtin	-1.44052	87.2274	0.0056583
psmc1b	proteasome 26S subunit, ATPase 1b	-1.55408	55.8603	0.00616704
cyb5r1	cytochrome b5 reductase 1	-2.80444	15.3893	0.00624669
utp6	UTP6, small subunit (SSU) processome component, homolog (yeast)	-2.74401	16.3443	0.00675481
vmp1	vacuole membrane protein 1	-1.60779	38.3837	0.00848788
pitrm1	pitrilysin metallopeptidase 1	-1.62058	26.5939	0.0103317
psmb6	proteasome subunit beta 6	-1.74069	155.111	0.0110513
psme1	proteasome activator subunit 1	-2.35933	13.7903	0.012002
zgc:92380	zgc:92380	-1.39025	13.3809	0.0131011
psmd11b	proteasome 26S subunit, non-ATPase 11b	-1.2537	36.895	0.0132077
aspscr1	alveolar soft part sarcoma chromosome region, candidate 1	-1.77712	12.4783	0.0132077
psmc5	proteasome 26S subunit, ATPase 5	-1.06372	137.566	0.0135172
adrm1	adhesion regulating molecule 1	-1.37892	42.8086	0.0138293
txnrd3	thioredoxin reductase 3	-1.0231	82.1494	0.0146454
psmg2	proteasome (prosome, macropain) assembly chaperone 2	-2.00255	16.8625	0.0146454
cxcl8a	chemokine (C-X-C motif) ligand 8a	-2.09095	7.84757	0.0146936
nfs1	NFS1 cysteine desulfurase	-1.11853	169.325	0.0148574
psma3	proteasome subunit alpha 3	-0.979613	153.263	0.015049
psmd3	proteasome 26S subunit, non-ATPase 3	-1.37743	105.859	0.015049
atf5a	activating transcription factor 5a	-1.87282	23.5107	0.015049
psma2	proteasome subunit alpha 2	-1.25838	67.4803	0.0154076
rsl1d1	ribosomal L1 domain containing 1	-1.82387	24.2396	0.0158368
psmc2	proteasome 26S subunit, ATPase 2	-0.94103	93.7006	0.0158695
rab39bb	RAB39B, member RAS oncogene family b	-2.01139	6.71596	0.0164722
mych	myelocytomatosis oncogene homolog	-2.07248	11.2105	0.016686
pik3cb	phosphatidylinositol-4,5-bisphosphate 3-kinase, catalytic subunit beta	-2.00172	6.65698	0.0176694
usp14	ubiquitin specific peptidase 14 (tRNA-guanine transglycosylase)	-1.36081	33.8113	0.0189045
psmd12	proteasome 26S subunit, non-ATPase 12	-0.995026	94.094	0.0194636
eif5b	eukaryotic translation initiation factor 5B	-1.56461	65.4649	0.0195532
psmb5	proteasome subunit beta 5	-1.12939	51.5949	0.0222847
slc26a1	solute carrier family 26 (anion exchanger), member 1	-1.87658	5.92528	0.0222847
insig1	insulin induced gene 1	-1.78298	29.4531	0.0227178
zgc:77158	zgc:77158	-1.7639	11.1464	0.0251066
gdpd2	glycerophosphodiester phosphodiesterase domain containing 2	-1.83288	13.8383	0.0251066
NA	NA	-0.673664	11.5442	0.026195
si:ch211-15b10.6	si:ch211-15b10.6	-1.7359	11.1678	0.0264331
si:dkey-100n23.3	si:dkey-100n23.3	-1.31384	36.5233	0.0268574
tpmt.1	thiopurine S-methyltransferase, tandem duplicate 1	-1.77372	13.6498	0.0268574
slc4a2a	solute carrier family 4 (anion exchanger), member 2a	-1.5698	4.47267	0.0282931
zgc:136930	zgc:136930	-0.694009	17.6247	0.0301735
psmb5	proteasome subunit beta 5	-1.15782	122.247	0.0305074
si:dkey-92f12.2	si:dkey-92f12.2	-1.30956	41.5422	0.0313657
cmbl	carboxymethylenebutenolidase homolog (Pseudomonas)	-1.59863	5.87704	0.0315342
ctps1a	CTP synthase 1a	-1.34539	19.9887	0.0338972
si:ch211-11k18.4	si:ch211-11k18.4	-1.52414	18.437	0.034778
mllt11	MLLT11, transcription factor 7 cofactor	-1.53479	34.126	0.0354487
lmna	lamin A	-1.36918	5.63701	0.0364242
rbm11	RNA binding motif protein 11	-1.58023	4.56188	0.0369976
psmb7	proteasome subunit beta 7	-1.07961	163.143	0.0385149
NA	NA	-1.24619	55.0314	0.0385149
tcf20	transcription factor 20	-1.24108	23.5954	0.0386063
rpl9	ribosomal protein L9	-0.495694	12.7982	0.0388669
adrm1	adhesion regulating molecule 1	-1.33335	23.5225	0.0398557
psmd4b	proteasome 26S subunit, non-ATPase 4b	-1.03346	42.1683	0.0400462
mrpl18	mitochondrial ribosomal protein L18	-1.3461	7.46436	0.0414738
si:ch73-335m24.5	si:ch73-335m24.5	-1.24835	3.37485	0.0436854
tbk1	TANK-binding kinase 1	-1.06985	61.1672	0.0437638
LOC101885512	apoptosis facilitator Bcl-2-like protein 14	-1.22088	6.2118	0.0439042
txnipa	thioredoxin interacting protein a	-1.32333	64.0865	0.0441525
ube2v1	ubiquitin-conjugating enzyme E2 variant 1	-1.04161	147.248	0.0469587
