# Supplementary material for: Long wavelength-sensing cones of zebrafish retina exhibit multiple layers of transcriptional heterogeneity
Source: Front Cell Neurosci. 2023 Jul 14;17:1214084. doi: 10.3389/fncel.2023.1214084 (PMC10382231; doi:10.3389/fncel.2023.1214084)
Supplement: Supplementary file 3 [file Data_Sheet_3.XLSX]

## Sheet: Sheet1
SYMBOL	GENENAME	padj	baseMean	moderatedL2FC		Overlap list: DE in all LWS cones vs. LWS1 cones, and DE in LWS2 cones vs. LWS1 cones, FDR<0.2
LOC100006428	ferritin, middle subunit-like	0.000696459	17.7874	-4.18692		(-) = enriched in dsRedExpress+
cyb5r1	cytochrome b5 reductase 1	0.00729227	15.3893	-2.80444		(+) = enriched in GFP+
LOC110438491	putative ribonuclease	0.00295573	15.0362	-2.79077
utp6	UTP6 small subunit processome component	0.00788828	16.3443	-2.74401
tex9	testis expressed 9	0.00262303	23.7572	-2.33535
zgc:103625	zgc:103625	0.00123222	69.9345	-2.10734
mapk8ip3	mitogen-activated protein kinase 8 interacting protein 3	0.00122869	42.9655	-1.93503
slc26a1	solute carrier family 26 member 1	0.0261866	5.92528	-1.87658
nr2f2	nuclear receptor subfamily 2, group F, member 2	2.46119e-05	73.1634	-1.86895
rsl1d1	ribosomal L1 domain containing 1	0.0185847	24.2396	-1.82387
arid3b	AT rich interactive domain 3B (BRIGHT-like)	0.00218588	41.766	-1.67196
pitrm1	pitrilysin metallopeptidase 1	0.0120933	26.5939	-1.62058
vmp1	vacuole membrane protein 1	0.00992753	38.3837	-1.60779
zgc:92380	zgc:92380	0.0153453	13.3809	-1.39025
lmna	lamin A	0.0422326	5.63701	-1.36918
opn1lw2	opsin 1 (cone pigments), long-wave-sensitive, 2	0.062522	2288.84	-1.23708
osbp2	oxysterol binding protein 2	0.0652022	7.91694	-1.20811
ctdnep1b	CTD nuclear envelope phosphatase 1b	0.0718531	25.3739	-1.20406
nfs1	NFS1 cysteine desulfurase	0.017422	169.325	-1.11853
nup88	nucleoporin 88	0.103686	16.9544	-1.06002
rtca	RNA 3'-terminal phosphate cyclase	0.113454	19.5053	-1.0478
chd7	chromodomain helicase DNA binding protein 7	0.0996511	149.111	-1.04661
angptl4	angiopoietin-like 4	0.123715	25.7126	-1.01172
lyst	lysosomal trafficking regulator	0.0798572	6.16894	-1.00314
apln	apelin	0.0878181	97.2962	-0.996452
tfr1b	transferrin receptor 1b	0.133364	23.3786	-0.972674
spsb1	splA/ryanodine receptor domain and SOCS box containing 1	0.121875	22.8131	-0.95579
LOC562466	cyclic nucleotide-gated cation channel beta-3-like	0.103686	248.329	-0.919786
sox6	SRY (sex determining region Y)-box 6	0.155075	33.211	-0.875985
heatr3	HEAT repeat containing 3	0.178335	16.0637	-0.81922
opn1mw1	opsin 1 (cone pigments), medium-wave-sensitive, 1	0.182116	1003.27	-0.786233
qars	glutaminyl-tRNA synthetase	0.138076	33.6052	-0.767334
hip1	huntingtin interacting protein 1	0.185878	24.152	-0.76456
arf3a	ADP-ribosylation factor 3a	0.19737	4.65896	-0.749748
zcchc4	zinc finger, CCHC domain containing 4	0.146406	6.83161	-0.744572
hspg2	heparan sulfate proteoglycan 2	0.178335	46.1805	-0.713937
si:ch73-139e5.2	si:ch73-139e5.2	0.179325	7.19703	-0.701769
zgc:136930	zgc:136930	0.0350879	17.6247	-0.694005
ppm1g	protein phosphatase, Mg2+/Mn2+ dependent, 1G	0.148584	46.069	-0.659671
rpl9	ribosomal protein L9	0.0451221	12.7982	-0.495694
atp5mea	ATP synthase membrane subunit ea	0.187484	357.329	-0.491093
aqp3a	aquaporin 3a	0.0963064	17.901	-0.419933
krt15	keratin 15	0.113454	55.0135	-0.289231
opn4.1	opsin 4.1	0.180493	382.741	0.509961
rab7a	RAB7a, member RAS oncogene family	0.178335	62.261	0.512425
sypb	synaptophysin b	0.0447051	822.582	0.55099
si:ch1073-429i10.3	si:ch1073-429i10.3	0.0718531	452.842	0.559371
slc38a5a	solute carrier family 38 member 5a	0.184235	688.707	0.581739
thrap3b	thyroid hormone receptor associated protein 3b	0.178335	62.4267	0.588094
eno1a	enolase 1a, (alpha)	0.173533	1092.73	0.652121
ldha	lactate dehydrogenase A4	0.178335	296.091	0.653123
stard10	StAR-related lipid transfer (START) domain containing 10	0.148281	2.96594	0.65935
slc1a2a	solute carrier family 1 member 2a	0.103686	649.747	0.665771
vegfaa	vascular endothelial growth factor Aa	0.189967	36.8166	0.681451
slc24a3	solute carrier family 24 member 3	0.171769	6.38692	0.684618
ralab	v-ral simian leukemia viral oncogene homolog Ab (ras related)	0.191242	25.4783	0.689524
rcan1a	regulator of calcineurin 1a	0.101467	134.206	0.689554
kdelr2a	KDEL endoplasmic reticulum protein retention receptor 2a	0.191242	33.2883	0.697668
usp6nl	USP6 N-terminal like	0.130522	3.85423	0.748446
alkbh5	alkB homolog 5, RNA demethylase	0.178136	10.4588	0.749289
slc25a23b	solute carrier family 25 member 23b	0.179113	152.411	0.751154
rpa2	replication protein A2	0.184642	17.0721	0.766505
inhbab	inhibin subunit beta Ab	0.190947	30.5767	0.773356
ap5m1	adaptor related protein complex 5 subunit mu 1	0.189967	7.46955	0.776494
arrdc3a	arrestin domain containing 3a	0.0637422	151.457	0.780059
gopc	golgi-associated PDZ and coiled-coil motif containing	0.184235	9.49987	0.795018
tstd2	thiosulfate sulfurtransferase like domain containing 2	0.179113	8.04567	0.803134
mkrn2os.1	MKRN2 opposite strand, tandem duplicate 1	0.178335	4.36169	0.812043
ndufaf5	NADH:ubiquinone oxidoreductase complex assembly factor 5	0.139755	76.3268	0.815631
LOC108182861	gastrula zinc finger protein XlCGF57.1-like	0.174392	5.74167	0.830532
pycr1a	pyrroline-5-carboxylate reductase 1a	0.123179	35.3688	0.831718
psat1	phosphoserine aminotransferase 1	0.174392	24.3033	0.832623
crtap	cartilage associated protein	0.171715	17.1877	0.833977
atf7ip	activating transcription factor 7 interacting protein	0.159132	45.0694	0.853508
map2k1	mitogen-activated protein kinase kinase 1	0.14381	15.3133	0.862143
hdhd2	haloacid dehalogenase-like hydrolase domain containing 2	0.147442	32.9159	0.877795
ttc9c	tetratricopeptide repeat domain 9C	0.155075	9.57763	0.87917
rab8b	RAB8B, member RAS oncogene family	0.136166	21.0305	0.884926
slc25a25b	solute carrier family 25 member 25b	0.154438	14.4882	0.889791
six6a	SIX homeobox 6a	0.148281	6.73293	0.903216
mon1a	MON1 secretory trafficking family member A	0.146204	9.55331	0.906581
bckdhbl	branched chain keto acid dehydrogenase E1, beta polypeptide, like	0.129843	25.7713	0.950725
dvl3a	dishevelled segment polarity protein 3a	0.136443	7.70866	0.962419
st3gal5	ST3 beta-galactoside alpha-2,3-sialyltransferase 5	0.0938903	31.8883	0.972774
epha6	eph receptor A6	0.128479	5.45625	0.980209
rgl1	ral guanine nucleotide dissociation stimulator-like 1	0.117013	7.78392	1.00048
traf3ip1	TNF receptor-associated factor 3 interacting protein 1	0.117161	10.0193	1.01944
gtf2h3	general transcription factor IIH, polypeptide 3	0.117062	10.4356	1.03842
eral1	Era-like 12S mitochondrial rRNA chaperone 1	0.114201	12.7377	1.05135
net1	neuroepithelial cell transforming 1	0.114201	19.3016	1.05548
phpt1	phosphohistidine phosphatase 1	0.113942	7.46041	1.05925
ift57	intraflagellar transport 57 homolog (Chlamydomonas)	0.072365	25.6585	1.06457
bbs7	Bardet-Biedl syndrome 7	0.0266995	84.4717	1.06707
dock3	dedicator of cytokinesis 3	0.101467	17.4527	1.07364
LOC101882840	sarcoplasmic reticulum histidine-rich calcium-binding protein-like	0.103686	16.3925	1.07755
opn1lw1	opsin 1 (cone pigments), long-wave-sensitive, 1	0.0996511	1575.27	1.07824
smad1	SMAD family member 1	0.0962025	8.72172	1.07929
taf6l	TAF6-like RNA polymerase II, p300/CBP-associated factor (PCAF)-associated factor	0.096299	22.4816	1.08019
mapk7	mitogen-activated protein kinase 7	0.0513557	24.4504	1.11279
tkta	transketolase a	0.0295053	362.387	1.11861
lage3	L antigen family member 3	0.0718531	23.1732	1.12258
snu13a	SNU13 homolog, small nuclear ribonucleoprotein a (U4/U6.U5)	0.0996511	8.77526	1.13842
si:ch211-206k20.5	si:ch211-206k20.5	0.0333885	28.2308	1.13908
enpp5	ectonucleotide pyrophosphatase/phosphodiesterase 5	0.0996511	7.79432	1.14404
unc119.2	unc-119 lipid binding chaperone B homolog 2	0.0366461	72.2447	1.1535
nmt2	N-myristoyltransferase 2	0.0479847	24.3387	1.16214
si:dkey-166c18.1	si:dkey-166c18.1	0.0831379	3.6587	1.17129
cdc27	cell division cycle 27	0.0805928	46.895	1.17736
gnai2a	guanine nucleotide binding protein (G protein), alpha inhibiting activity polypeptide 2a	0.0875079	31.9103	1.20832
sult1st1	sulfotransferase family 1, cytosolic sulfotransferase 1	0.0824864	14.7999	1.21791
eef1a1b	eukaryotic translation elongation factor 1 alpha 1b	0.0805504	24.3568	1.22093
vps54	VPS54 subunit of GARP complex	0.0513557	26.0986	1.22224
LOC566640	solute carrier family 22 member 6-like	0.0459965	714.894	1.22785
dync1i1	dynein, cytoplasmic 1, intermediate chain 1	0.0731043	5.05172	1.22839
ahcyl1	adenosylhomocysteinase-like 1	0.00932651	59.2754	1.23035
gpm6ab	glycoprotein M6Ab	0.070562	97.0806	1.24262
fen1	flap structure-specific endonuclease 1	0.0735806	13.0246	1.24353
rps6kc1	ribosomal protein S6 kinase polypeptide 1	0.0227257	39.6698	1.25809
ston2	stonin 2	0.0672089	21.8938	1.25876
foxg1a	forkhead box G1a	0.0677546	10.6332	1.25914
abhd12	abhydrolase domain containing 12	0.00305344	78.894	1.28072
xpc	xeroderma pigmentosum, complementation group C	0.0732022	7.09513	1.28606
tmem259	transmembrane protein 259	0.0159122	28.0045	1.28637
gngt2a	guanine nucleotide binding protein (G protein), gamma transducing activity polypeptide 2a	0.00932651	2266.14	1.30112
aldoaa	aldolase a, fructose-bisphosphate, a	0.00183617	287.977	1.34001
washc4	WASH complex subunit 4	0.0440323	17.6793	1.34321
pcbp4	poly(rC) binding protein 4	0.0110467	83.177	1.36787
exoc1	exocyst complex component 1	0.0511837	43.4994	1.37079
si:ch73-100l22.3	si:ch73-100l22.3	0.0623025	17.95	1.38609
atp6v1b2	ATPase H+ transporting V1 subunit B2	0.0102673	22.131	1.3866
sacm1la	SAC1 like phosphatidylinositide phosphatase a	0.0115015	42.1192	1.39255
cd81a	CD81 molecule a	0.0364987	87.0507	1.4157
hnrnph1	heterogeneous nuclear ribonucleoprotein H1	0.0347433	22.2527	1.42646
gemin8	gem (nuclear organelle) associated protein 8	0.0481946	12.8508	1.46113
hmgb1b	high mobility group box 1b	0.000159466	140.42	1.46461
nr2f5	nuclear receptor subfamily 2, group F, member 5	0.0463164	12.5852	1.47774
ldb3a	LIM domain binding 3a	0.0226567	32.5467	1.48916
mcoln1a	mucolipin 1a	0.0304209	15.7128	1.49102
parvb	parvin, beta	0.0481946	7.39254	1.49448
opn1lw1	opsin 1 (cone pigments), long-wave-sensitive, 1	0.0176551	6706.55	1.51559
wdtc1	WD and tetratricopeptide repeats 1	0.0266995	51.1819	1.53121
zgc:77739	zgc:77739	0.0422326	9.88681	1.56499
gngt2a	guanine nucleotide binding protein (G protein), gamma transducing activity polypeptide 2a	0.00032704	678.768	1.58634
akt3b	v-akt murine thymoma viral oncogene homolog 3b	0.0360652	10.8707	1.61066
pik3c2b	phosphatidylinositol-4-phosphate 3-kinase, catalytic subunit type 2 beta	0.039483	14.5208	1.61764
st5	suppression of tumorigenicity 5	0.0295053	12.877	1.66744
sowahab	sosondowah ankyrin repeat domain family member Ab	0.0368108	8.29436	1.67155
rcc2	regulator of chromosome condensation 2	0.0333885	28.7436	1.71426
eif4g3b	eukaryotic translation initiation factor 4 gamma, 3b	0.027551	40.4759	1.72737
ppp2r3c	protein phosphatase 2, regulatory subunit B'', gamma	0.00453839	28.9052	1.73189
gadd45ab	growth arrest and DNA-damage-inducible, alpha, b	0.0184184	16.9007	1.74528
phrf1	PHD and ring finger domains 1	0.0104904	39.5566	1.76473
marco	macrophage receptor with collagenous structure	0.0300906	9.53591	1.79898
gpatch11	G patch domain containing 11	0.0159122	16.4893	1.80033
tagapb	T cell activation RhoGTPase activating protein b	0.0242558	37.5518	1.81448
ifi30	IFI30 lysosomal thiol reductase	0.0288291	21.9801	1.82553
meis2a	Meis homeobox 2a	0.0226555	7.53149	1.88219
ivd	isovaleryl-CoA dehydrogenase	0.00121782	58.4664	1.88732
klhl7	kelch-like family member 7	0.0226567	5.66734	1.88847
sqor	sulfide quinone oxidoreductase	0.00496838	13.4651	1.89263
mbd3b	methyl-CpG binding domain protein 3b	0.0226555	8.34701	1.90331
ccnd1	cyclin D1	0.0239754	14.7393	1.94553
snrnp40	small nuclear ribonucleoprotein 40 (U5)	0.00689703	14.3001	1.95749
p4ha2	procollagen-proline, 2-oxoglutarate 4-dioxygenase (proline 4-hydroxylase), alpha polypeptide 2	0.0052285	13.4573	2.05519
tmem41aa	transmembrane protein 41aa	0.0195878	5.36537	2.08011
pcyox1l	prenylcysteine oxidase 1 like	0.0180437	23.2261	2.10169
myclb	MYCL proto-oncogene, bHLH transcription factor b	0.00238326	27.1123	2.20721
ppat	phosphoribosyl pyrophosphate amidotransferase	0.0162094	4.34773	2.2428
si:ch211-117m20.4	si:ch211-117m20.4	0.00299414	43.4159	2.25004
slc12a7a	solute carrier family 12 member 7a	0.00992753	5.42459	2.25607
g0s2	G0/G1 switch 2	0.00663173	39.3592	2.2717
tlk1a	tousled-like kinase 1a	0.00104119	40.0583	2.28461
si:dkey-222f8.3	si:dkey-222f8.3	0.0143887	6.7737	2.32553
quo	quattro	0.00788828	7.68739	2.4513
tmem170a	transmembrane protein 170A	0.000400356	9.47505	2.46458
znf395a	zinc finger protein 395a	0.000871388	12.9112	2.53196
abcg4b	ATP-binding cassette, sub-family G (WHITE), member 4b	0.000218817	35.1918	2.65226
mtrr	5-methyltetrahydrofolate-homocysteine methyltransferase reductase	0.00238326	12.6023	2.68671
bhlhe23	basic helix-loop-helix family, member e23	0.00689703	7.81398	2.73609
kmt2ca	lysine (K)-specific methyltransferase 2Ca	0.000665318	92.195	2.96466
med14	mediator complex subunit 14	0.000739661	23.3728	3.01402
tmem56b	transmembrane protein 56b	0.00238326	6.79789	3.04011
intu	inturned planar cell polarity protein	0.00191135	12.213	3.07274
ppt2	palmitoyl-protein thioesterase 2	0.000340711	23.3475	3.10658
cldn11a	claudin 11a	0.0039991	10.8595	3.15038
ddr1	discoidin domain receptor tyrosine kinase 1	0.000871388	13.0658	3.25128
rgs12a	regulator of G protein signaling 12a	0.00121782	15.1991	3.40179
si:dkey-91i10.3	si:dkey-91i10.3	0.00247821	3.38954	3.72402
ltbp1	latent transforming growth factor beta binding protein 1	0.000151404	8.62171	5.68401

## Sheet: Sheet2
SYMBOL	GENENAME	padj	baseMean	moderatedL2FC		Overlap list: DE in all LWS cones vs. LWS2 cones, and DE in LWS1 cones vs. LWS2 cones, FDR<0.2
sqstm1	sequestosome 1	4.9908e-09	91.0712	-2.41236		(-) = enriched in dsRedExpress+
syt4	synaptotagmin IV	7.24941e-07	22.9597	-5.16596		(+) = enriched in GFP+
gnl3l	guanine nucleotide binding protein-like 3 (nucleolar)-like	4.59373e-06	40.1748	-2.41526
psmb1	proteasome subunit beta 1	4.59373e-06	121.4	-2.38535
rps13	ribosomal protein S13	4.59373e-06	45.1981	22.5838
psma4	proteasome subunit alpha 4	7.70403e-06	92.7342	-1.86713
psmb3	proteasome subunit beta 3	2.46119e-05	154.36	-1.84939
calm1b	calmodulin 1b	0.000138272	95.7218	-1.36798
txn	thioredoxin	0.000151404	19.8869	-3.9518
rps27l	ribosomal protein S27 like	0.000151404	19.6822	-3.4044
phlda3	pleckstrin homology-like domain, family A, member 3	0.000174898	4.43778	-5.44163
psmd14	proteasome 26S subunit, non-ATPase 14	0.000174898	73.7219	-1.50821
ckba	creatine kinase, brain a	0.000218817	14.497	-2.65248
zgc:56493	zgc:56493	0.000218817	205.161	-1.3904
qdpra	quinoid dihydropteridine reductase a	0.000251324	10.6989	-2.95116
psmc4	proteasome 26S subunit, ATPase 4	0.000254369	89.5505	-1.54494
fthl31	ferritin, heavy polypeptide-like 31	0.000340711	75.0738	-2.77111
psmd13	proteasome 26S subunit, non-ATPase 13	0.000347839	85.1523	-2.17342
LOC100006428	ferritin, middle subunit-like	0.000696459	17.7874	-4.18692
nsfl1c	NSFL1 (p97) cofactor (p47)	0.000756569	73.5241	-1.46421
psmb2	proteasome subunit beta 2	0.00076661	141.154	-1.6227
sox4a	SRY (sex determining region Y)-box 4a	0.00102359	66.147	-2.08756
tdrd7b	tudor domain containing 7 b	0.00104119	62.8025	-1.98773
sox11b	SRY (sex determining region Y)-box 11b	0.0025569	17.4626	-3.07557
psmd7	proteasome 26S subunit, non-ATPase 7	0.0025569	74.8135	-1.43895
fthl28	ferritin, heavy polypeptide-like 28	0.00276371	21.6083	-2.39413
psma6a	proteasome subunit alpha 6a	0.00354241	70.8027	-1.66264
psmd1	proteasome 26S subunit, non-ATPase 1	0.00416302	86.9698	-1.67227
sybu	syntabulin (syntaxin-interacting)	0.00423526	65.2164	1.79723
psmc3	proteasome 26S subunit, ATPase 3	0.00519073	91.1564	-1.49844
mb	myoglobin	0.0061365	17.2806	2.37636
si:dkey-34l15.1	si:dkey-34l15.1	0.00663173	3.15622	-2.88953
psmc1b	proteasome 26S subunit, ATPase 1b	0.00719794	55.8603	-1.55408
slc25a55a	solute carrier family 25 member 55a	0.00814836	181.294	1.44363
psmb6	proteasome subunit beta 6	0.0129372	155.111	-1.74069
psme1	proteasome activator subunit 1	0.0140518	13.7903	-2.35933
psmd11b	proteasome 26S subunit, non-ATPase 11b	0.0154733	36.895	-1.2537
psmc5	proteasome 26S subunit, ATPase 5	0.0158375	137.566	-1.06372
adrm1	adhesion regulating molecule 1	0.0162094	42.8086	-1.37892
psmg2	proteasome (prosome, macropain) assembly chaperone 2	0.0171705	16.8625	-2.00255
txnrd3	thioredoxin reductase 3	0.0171705	82.1494	-1.0231
cxcl8a	chemokine (C-X-C motif) ligand 8a	0.0172284	7.84757	-2.09095
atf5a	activating transcription factor 5a	0.0176551	23.5107	-1.87282
psmd3	proteasome 26S subunit, non-ATPase 3	0.0176551	105.859	-1.37743
psma3	proteasome subunit alpha 3	0.0176551	153.263	-0.979613
psma2	proteasome subunit alpha 2	0.0180784	67.4803	-1.25838
psmc2	proteasome 26S subunit, ATPase 2	0.0186243	93.7006	-0.94103
rab39bb	RAB39B, member RAS oncogene family b	0.0193343	6.71596	-2.01139
mych	myelocytomatosis oncogene homolog	0.0195878	11.2105	-2.07248
pik3cb	phosphatidylinositol-4,5-bisphosphate 3-kinase, catalytic subunit beta	0.0207462	6.65698	-2.00172
mycla	MYCL proto-oncogene, bHLH transcription factor a	0.0209113	14.7023	1.92725
usp14	ubiquitin specific peptidase 14 (tRNA-guanine transglycosylase)	0.022199	33.8113	-1.36081
psmd12	proteasome 26S subunit, non-ATPase 12	0.0228658	94.094	-0.995026
eif5b	eukaryotic translation initiation factor 5B	0.0229723	65.4649	-1.56461
psmb5	proteasome subunit beta 5	0.0261866	51.5949	-1.12939
insig1	insulin induced gene 1	0.0266995	29.4531	-1.78298
gdpd2	glycerophosphodiester phosphodiesterase domain containing 2	0.0295053	13.8383	-1.83288
si:ch73-1a9.3	si:ch73-1a9.3	0.0295053	782.7	0.926384
rhol	rhodopsin, like	0.0295053	237.662	1.44191
cgnb	cingulin b	0.0295053	26.1609	1.64751
si:ch211-15b10.6	si:ch211-15b10.6	0.030701	11.1678	-1.7359
si:dkey-100n23.3	si:dkey-100n23.3	0.0312045	36.5233	-1.31384
slc4a2a	solute carrier family 4 member 2a	0.0328762	4.47267	-1.5698
psmb5	proteasome subunit beta 5	0.0354827	122.247	-1.15782
cmbl	carboxymethylenebutenolidase homolog (Pseudomonas)	0.0367016	5.87704	-1.59863
pola1	polymerase (DNA directed), alpha 1	0.0381462	9.60471	1.46681
mllt11	MLLT11 transcription factor 7 cofactor	0.0413037	34.126	-1.53479
rbm11	RNA binding motif protein 11	0.0429235	4.56188	-1.58023
NA	NA	0.0447051	55.0314	-1.24619
psmb7	proteasome subunit beta 7	0.0447051	163.143	-1.07961
psmd4b	proteasome 26S subunit, non-ATPase 4b	0.046516	42.1683	-1.03346
ak4	adenylate kinase 4	0.0510396	19.5338	1.3088
txnipa	thioredoxin interacting protein a	0.0513557	64.0865	-1.32333
irf2bp2b	interferon regulatory factor 2 binding protein 2b	0.0525323	167.77	0.983502
cited4b	Cbp/p300-interacting transactivator, with Glu/Asp-rich carboxy-terminal domain, 4b	0.0607804	65.6593	1.00898
nfkbib	nuclear factor of kappa light polypeptide gene enhancer in B-cells inhibitor, beta	0.0616808	30.2033	-1.00371
lats1	large tumor suppressor kinase 1	0.062522	33.741	1.06066
si:ch73-31d8.2	si:ch73-31d8.2	0.062522	15.0303	1.36327
psmb4	proteasome subunit beta 4	0.0639486	192.328	-0.966516
mgp	matrix Gla protein	0.0652385	10.6321	-1.34817
jun	Jun proto-oncogene, AP-1 transcription factor subunit	0.0742105	244.095	-1.23128
zgc:114200	zgc:114200	0.0795389	22.8962	1.14859
guca1c	guanylate cyclase activator 1C	0.0974872	2916.66	0.795886
ptmaa	prothymosin alpha a	0.101467	793.199	0.810571
abcc13	ATP-binding cassette, sub-family C (CFTR/MRP), member 13	0.101467	15.629	1.12723
nfkb2	nuclear factor of kappa light polypeptide gene enhancer in B-cells 2 (p49/p100)	0.102339	15.4362	-1.11826
elf1	E74-like ETS transcription factor 1	0.105795	5.35428	-0.852984
si:ch211-235e9.8	si:ch211-235e9.8	0.113454	246.426	0.937502
stox2a	storkhead box 2a	0.11373	19.0374	-1.04978
mfsd2ab	major facilitator superfamily domain containing 2ab	0.113942	15.3124	-1.03992
nfe2l1b	nuclear factor, erythroid 2-like 1b	0.113942	62.7786	-0.668002
cfd	complement factor D (adipsin)	0.113942	16.4031	-0.320833
qdprb1	quinoid dihydropteridine reductase b1	0.113942	2.31217	0.723754
pprc1	PPARG related coactivator 1	0.116658	3.59245	-0.865125
ppp1r3ca	protein phosphatase 1, regulatory subunit 3Ca	0.116658	2.7966	-0.833113
psmd11a	proteasome 26S subunit, non-ATPase 11a	0.122446	32.0937	-0.855639
psmd10	proteasome 26S subunit, non-ATPase 10	0.123179	7.96849	-0.956111
aldh1l1	aldehyde dehydrogenase 1 family, member L1	0.123179	5.96437	0.758194
si:dkeyp-115e12.6	si:dkeyp-115e12.6	0.128479	14.3373	-0.987575
epha6	eph receptor A6	0.128479	5.45625	0.980209
si:dkey-33i11.1	si:dkey-33i11.1	0.138663	7.68249	0.614803
selenot2	selenoprotein T, 2	0.139363	211.801	-0.646308
me1	malic enzyme 1, NADP(+)-dependent, cytosolic	0.139755	3.50628	-0.775476
si:ch211-198m17.1	si:ch211-198m17.1	0.147147	119.68	0.771154
fat1b	FAT atypical cadherin 1b	0.148592	31.0549	0.852655
psma8	proteasome subunit alpha 8	0.158081	189.09	-0.702539
LOC101886358	cadherin-18	0.158081	105.126	0.554927
lonrf1l	LON peptidase N-terminal domain and ring finger 1, like	0.158081	68.0385	0.712002
usp5	ubiquitin specific peptidase 5 (isopeptidase T)	0.1587	50.8613	-0.590215
fthl27	ferritin, heavy polypeptide-like 27	0.159118	177.754	-0.757364
psmc6	proteasome 26S subunit, ATPase 6	0.160453	17.6812	-0.689717
psmc1a	proteasome 26S subunit, ATPase 1a	0.165563	77.5619	-0.608894
rpl21	ribosomal protein L21	0.174519	5.97609	0.133711
cst14a.2	cystatin 14a, tandem duplicate 2	0.178335	28.9265	-0.726784
nudc	nudC nuclear distribution protein	0.178335	42.8488	-0.677854
atf5b	activating transcription factor 5b	0.179113	12.2124	-0.80839
cry3b	cryptochrome circadian regulator 3b	0.179113	90.9938	0.793939
sox4b	SRY (sex determining region Y)-box 4b	0.181328	12.269	-0.7694
opn1mw1	opsin 1 (cone pigments), medium-wave-sensitive, 1	0.182116	1003.27	-0.786233
nhsl1a	NHS-like 1a	0.188612	270.592	0.618294
arf3a	ADP-ribosylation factor 3a	0.19737	4.65896	-0.749748
