# Supplementary material for: Long wavelength-sensing cones of zebrafish retina exhibit multiple layers of transcriptional heterogeneity
Source: Front Cell Neurosci. 2023 Jul 14;17:1214084. doi: 10.3389/fncel.2023.1214084 (PMC10382231; doi:10.3389/fncel.2023.1214084)
Supplement: Supplementary file 4 [file Data_Sheet_4.XLSX]

## Sheet: all LWS1 transcripts
	p_val	avg_logFC	pct.1	pct.2	p_val_adj	cluster	gene
arr3a	6.27e-08	0.815775	1	0.767	0.000973006	0	arr3a
guca1c	2.26e-07	0.811014	1	0.75	0.00350963	0	guca1c
pdcb	2.33e-07	0.85553	0.971	0.683	0.0036097	0	pdcb
camk1gb	3.04e-07	0.823057	0.971	0.767	0.00471018	0	camk1gb
gngt2a	1.03e-06	0.901949	1	0.65	0.015941	0	gngt2a
grk7a	1.43e-06	0.678496	1	0.7	0.0221782	0	grk7a
mt-nd4l	1.85e-06	0.842579	0.912	0.517	0.028718	0	mt-nd4l
slc25a3a	2.34e-06	1.00019	0.824	0.483	0.0362502	0	slc25a3a
slc24a2	5.08e-06	0.80639	0.882	0.633	0.078894	0	slc24a2
six7	5.51e-06	0.935092	0.824	0.45	0.0855519	0	six7
si:busm1-57f23.1	1.19e-05	1.36481	0.559	0.15	0.185036	0	si:busm1-57f23.1
tpd52l1	1.26e-05	0.943805	0.794	0.433	0.195135	0	tpd52l1
es1	1.42e-05	1.2442	0.941	0.65	0.221007	0	es1
slc25a25a	2.03e-05	1.21226	0.676	0.333	0.314456	0	slc25a25a
rcvrn3	2.48e-05	0.567838	1	0.733	0.38534	0	rcvrn3
si:dkey-190l8.2	3.16e-05	0.848143	0.824	0.483	0.490299	0	si:dkey-190l8.2
mt-nd4	3.25e-05	0.610571	0.971	0.95	0.504878	0	mt-nd4
gnb3b	3.36e-05	0.743968	0.971	0.733	0.52188	0	gnb3b
slc1a2a	5.74e-05	0.656678	0.912	0.683	0.890741	0	slc1a2a
hif1ab	5.99e-05	0.613381	0.941	0.75	0.929505	0	hif1ab
mt-co1	6.09e-05	0.493493	1	1	0.945302	0	mt-co1
mt-co2	6.96e-05	0.456001	1	1	1	0	mt-co2
nin	8.21e-05	0.73723	0.882	0.5	1	0	nin
gnat2	0.000103457	0.660871	0.912	0.717	1	0	gnat2
mt-nd3	0.00012893	0.521949	0.971	0.933	1	0	mt-nd3
dclk2a	0.000135668	0.592854	0.853	0.583	1	0	dclk2a
mt-co3	0.00017169	0.502853	1	1	1	0	mt-co3
si:ch211-237l4.6	0.000203814	0.613788	0.882	0.633	1	0	si:ch211-237l4.6
si:dkey-97a13.12	0.000208548	0.739628	0.794	0.55	1	0	si:dkey-97a13.12
mt-nd2	0.000318194	0.458902	0.971	1	1	0	mt-nd2
rcvrn2	0.000324879	0.816032	0.912	0.633	1	0	rcvrn2
zgc:195245	0.000449192	0.967799	0.706	0.433	1	0	zgc:195245
mt-cyb	0.000469247	0.43815	1	0.983	1	0	mt-cyb
ckbb	0.000490332	0.526988	1	0.967	1	0	ckbb
mt-atp6	0.000527776	0.398535	1	1	1	0	mt-atp6
nt5c3a	0.000579708	0.812937	0.588	0.267	1	0	nt5c3a
pde6c	0.000664183	0.563138	1	0.667	1	0	pde6c
ckmt2a	0.000691265	0.979438	0.647	0.383	1	0	ckmt2a
arr3b	0.000716673	1.16462	0.765	0.5	1	0	arr3b
si:ch73-141c7.1	0.000730434	0.941129	0.529	0.233	1	0	si:ch73-141c7.1
paplna	0.00103682	0.665752	0.765	0.467	1	0	paplna
inaa	0.00112986	0.757908	0.676	0.45	1	0	inaa
nme2a	0.00114507	0.619211	0.765	0.55	1	0	nme2a
hexb	0.00128325	0.764288	0.706	0.467	1	0	hexb
atp1b2b	0.00132488	0.489502	0.971	0.75	1	0	atp1b2b
ppm1na	0.00133105	0.567858	0.882	0.633	1	0	ppm1na
oaz2a	0.00150786	0.701192	0.706	0.417	1	0	oaz2a
ip6k1	0.00158088	0.874792	0.471	0.217	1	0	ip6k1
slc12a7b	0.00203207	0.724128	0.735	0.467	1	0	slc12a7b
mt-nd1	0.00229454	0.409823	0.971	1	1	0	mt-nd1
usp21	0.00235221	0.487895	0.765	0.483	1	0	usp21
clul1	0.00252117	0.5513	0.794	0.567	1	0	clul1
cdk5r2b	0.00305054	0.469286	0.794	0.583	1	0	cdk5r2b
appa	0.00316582	0.690843	0.765	0.65	1	0	appa
gngt2b	0.00335799	0.713622	0.941	0.867	1	0	gngt2b
si:dkey-126g1.9	0.00383307	0.743283	0.441	0.2	1	0	si:dkey-126g1.9
serinc1	0.00386823	0.340281	0.912	0.817	1	0	serinc1
si:ch211-81a5.8	0.00454356	0.770906	0.559	0.333	1	0	si:ch211-81a5.8
arg2	0.00464467	0.568516	0.853	0.75	1	0	arg2
zfand5a	0.00549957	0.752763	0.647	0.433	1	0	zfand5a
atp2b1b	0.00578097	0.542514	0.794	0.617	1	0	atp2b1b
phb2a	0.00601706	0.833251	0.265	0.067	1	0	phb2a
si:ch1073-303d10.1	0.00607523	0.542284	0.794	0.467	1	0	si:ch1073-303d10.1
guk1b	0.00644302	0.614143	0.735	0.533	1	0	guk1b
sypb	0.00740421	0.404092	0.941	0.767	1	0	sypb
nptx1l	0.00854009	0.753544	0.471	0.233	1	0	nptx1l
rnf34a	0.00897838	0.787071	0.382	0.167	1	0	rnf34a
atp5l	0.00907272	0.383748	0.853	0.75	1	0	atp5l
si:dkey-61n16.5	0.00983499	0.465548	0.765	0.55	1	0	si:dkey-61n16.5
zc4h2	0.000184984	1.06701	0.323	0.048	1	1	zc4h2
gabarapb1	0.000350976	1.0147	0.677	0.524	1	1	gabarapb
calm2a	0.000726466	1.3279	0.355	0.095	1	1	calm2a
rtn1b	0.000783388	0.931988	0.258	0.032	1	1	rtn1b
rpl12	0.000974471	1.03302	0.774	0.651	1	1	rpl12
rps26	0.000992952	0.733686	0.774	0.619	1	1	rps26
h1fx	0.00106416	1.26962	0.419	0.143	1	1	h1fx
si:dkey-16p21.81	0.00125652	1.06444	0.71	0.603	1	1	si:dkey-16p21.8
mdh1aa	0.00132596	1.0467	0.645	0.54	1	1	mdh1aa
tmsb4x1	0.00175098	1.68969	0.742	0.714	1	1	tmsb4x
ppiab1	0.00183186	1.3289	0.581	0.429	1	1	ppiab
sub1a	0.00240562	0.980824	0.452	0.19	1	1	sub1a
gmfb	0.00299892	0.722275	0.258	0.048	1	1	gmfb
ywhah1	0.00330784	0.919674	0.419	0.19	1	1	ywhah
slc6a1b	0.00361174	1.22501	0.258	0.048	1	1	slc6a1b
rgs16	0.00436732	1.328	0.258	0.063	1	1	rgs16
rpl341	0.00459179	0.891807	0.677	0.619	1	1	rpl34
erh	0.0067368	0.917114	0.516	0.333	1	1	erh
nsg2	0.00748656	1.54356	0.29	0.095	1	1	nsg2
stmn1b	0.00751562	1.54825	0.516	0.333	1	1	stmn1b
FQ323156.1	0.00819457	1.27356	0.516	0.365	1	1	FQ323156.1
hmgb1b	0.00829582	0.965227	0.387	0.19	1	1	hmgb1b
fam107b	0.00855632	1.57787	0.387	0.19	1	1	fam107b
hsp90ab1	0.00959977	0.795913	0.71	0.619	1	1	hsp90ab1
rbp5	0.00970236	1.12448	0.258	0.079	1	1	rbp5
rom1a1	7.35e-11	1.26154	1	0.446	1.14e-06	2	rom1a
rho2	1.71e-10	1.03416	1	0.985	2.66e-06	2	rho
sagb2	1.15e-09	1.20003	1	0.723	1.78e-05	2	sagb
gnat12	1.69e-09	1.08735	1	0.8	2.63e-05	2	gnat1
gngt11	2.18e-09	0.94168	1	0.969	3.38e-05	2	gngt1
pde6b2	2.19e-09	1.46341	0.897	0.385	3.4e-05	2	pde6b
pdca1	4.17e-09	1.00226	1	0.631	6.46e-05	2	pdca
tdrd7b1	5.48e-09	0.938101	0.724	0.092	8.51e-05	2	tdrd7b
ppdpfa1	5.86e-09	0.907994	1	0.923	9.09e-05	2	ppdpfa
pex52	6.7e-09	0.975379	0.966	0.277	0.000103905	2	pex5
prom1b1	1.27e-08	1.0273	1	0.338	0.000197083	2	prom1b
pde6gb2	1.59e-08	0.868613	1	0.846	0.000246431	2	pde6gb
eps8a1	1.68e-08	0.795276	0.621	0.062	0.000259905	2	eps8a
ndrg1a1	1.76e-08	1.16504	0.931	0.354	0.000273387	2	ndrg1a
grk1a1	2.35e-08	1.07659	1	0.431	0.000365129	2	grk1a
elovl4b1	3.01e-08	0.910908	1	0.615	0.000466538	2	elovl4b
gnb1b1	6.35e-08	1.17777	0.966	0.723	0.000984771	2	gnb1b
rbp31	9.59e-08	0.949833	1	0.677	0.00148818	2	rbp3
zgc:1621441	1.42e-07	1.19618	0.862	0.354	0.00220876	2	zgc:162144
gnb1a1	1.44e-07	0.91689	0.966	0.692	0.00223255	2	gnb1a
pde6a1	1.67e-07	1.05481	0.931	0.508	0.00258346	2	pde6a
saga1	1.86e-07	0.917836	0.966	0.646	0.00288354	2	saga
chka1	1.98e-07	0.865715	0.655	0.092	0.00307419	2	chka
cited4a1	2.02e-07	0.736057	0.621	0.077	0.0031317	2	cited4a
tent5ba1	2.19e-07	0.635246	0.483	0.031	0.00339894	2	tent5ba
rom1b1	2.24e-07	0.852436	0.966	0.477	0.00348158	2	rom1b
syne2b1	2.5e-07	0.867138	0.69	0.123	0.00387791	2	syne2b
cnga1b1	2.53e-07	1.13745	0.793	0.292	0.00393041	2	cnga1b
gucy2f1	2.55e-07	1.0609	0.793	0.215	0.00395841	2	gucy2f
CABZ01056321.11	3.77e-07	0.809806	0.621	0.092	0.00585155	2	CABZ01056321.1
ewsr1a1	4.72e-07	0.806493	0.862	0.231	0.00731739	2	ewsr1a
abca4b1	4.8e-07	1.09258	0.724	0.2	0.00745121	2	abca4b
guca1a1	5.09e-07	0.888764	0.724	0.154	0.00789727	2	guca1a
papd51	5.11e-07	0.901573	0.655	0.123	0.00793133	2	papd5
prom1a1	5.45e-07	0.954889	0.862	0.308	0.00845832	2	prom1a
pla2g151	1.36e-06	0.597807	0.483	0.046	0.0211456	2	pla2g15
si:ch211-113d22.21	1.41e-06	0.791266	1	0.769	0.0219254	2	si:ch211-113d22.2
tbc1d10aa	1.45e-06	0.583424	0.655	0.108	0.0224818	2	tbc1d10aa
luc7l31	1.62e-06	0.740752	0.586	0.092	0.0250962	2	luc7l3
pfkpb	1.64e-06	0.689297	0.483	0.046	0.0253957	2	pfkpb
lrp2a	1.7e-06	0.702821	0.379	0.015	0.0263892	2	lrp2a
fzd4	1.96e-06	0.505855	0.379	0.015	0.0303617	2	fzd4
zgc:1540931	2e-06	0.876755	0.724	0.185	0.0310738	2	zgc:154093
pde6ga	2.42e-06	0.784248	1	0.508	0.0375244	2	pde6ga
arl13a1	2.61e-06	0.876266	0.828	0.338	0.0404947	2	arl13a
gpsm2	2.7e-06	0.733895	0.552	0.077	0.0418217	2	gpsm2
rgs9b1	3.21e-06	0.734784	0.966	0.354	0.0497731	2	rgs9b
sf3b11	3.21e-06	0.579617	0.897	0.246	0.0498325	2	sf3b1
cldnd1a1	3.41e-06	0.602828	0.586	0.092	0.0529619	2	cldnd1a
cep2901	3.81e-06	0.693592	0.724	0.154	0.0591242	2	cep290
si:ch211-195b15.71	3.91e-06	0.812207	0.828	0.338	0.0607441	2	si:ch211-195b15.7
pik3r3a1	4.07e-06	0.653561	0.483	0.062	0.0632057	2	pik3r3a
guca1b	4.1e-06	0.846666	0.931	0.492	0.0635876	2	guca1b
si:ch211-233a24.2	4.1e-06	0.569172	0.414	0.031	0.063637	2	si:ch211-233a24.2
AL840638.1	4.1e-06	0.445546	0.414	0.031	0.063637	2	AL840638.1
zgc:112334	4.34e-06	0.77738	0.552	0.092	0.0672729	2	zgc:112334
nfu1	4.74e-06	0.668159	0.448	0.046	0.0735357	2	nfu1
si:ch211-198m17.11	4.98e-06	0.69146	0.724	0.169	0.0772012	2	si:ch211-198m17.1
cnga1a	5.86e-06	0.85773	0.793	0.277	0.0909285	2	cnga1a
adipor21	5.99e-06	0.476799	0.69	0.154	0.0928728	2	adipor2
mbnl21	6.11e-06	1.00978	0.724	0.246	0.0948623	2	mbnl2
emc2	6.38e-06	0.318392	0.448	0.046	0.0989432	2	emc2
tnpo2	6.73e-06	0.610073	0.345	0.015	0.104435	2	tnpo2
hipk21	6.79e-06	0.6074	0.483	0.062	0.105288	2	hipk2
camk2g1	7.66e-06	0.66641	0.655	0.138	0.118871	2	camk2g1
auts2b	7.68e-06	0.697618	0.379	0.031	0.119184	2	auts2b
arap3	7.72e-06	0.576277	0.345	0.015	0.119842	2	arap3
nfatc3a1	8.02e-06	0.617736	0.483	0.062	0.124504	2	nfatc3a
rgs9bp	1.02e-05	0.533882	0.586	0.108	0.158611	2	rgs9bp
dyrk4	1.04e-05	0.615509	0.69	0.154	0.161759	2	dyrk4
tulp1b1	1.07e-05	0.629623	0.759	0.231	0.166657	2	tulp1b
mao1	1.1e-05	0.627147	0.552	0.092	0.171056	2	mao
rhpn2	1.14e-05	0.686027	0.276	0	0.176439	2	rhpn2
faimb	1.18e-05	0.65426	0.586	0.108	0.183836	2	faimb
lingo1b	1.35e-05	0.573288	0.379	0.031	0.210155	2	lingo1b
zgc:1984191	1.46e-05	0.860246	0.621	0.138	0.225771	2	zgc:198419
pde6ha1	1.49e-05	0.503998	1	0.985	0.23093	2	pde6ha
birc6	1.53e-05	0.55644	0.379	0.031	0.237917	2	birc6
oxr1b1	1.53e-05	0.640177	0.828	0.246	0.238047	2	oxr1b
map3k71	1.66e-05	0.728005	0.483	0.077	0.257977	2	map3k7
atf4a1	1.82e-05	0.702059	0.897	0.354	0.282611	2	atf4a
si:dkey-23o4.61	1.86e-05	0.68011	0.448	0.062	0.288087	2	si:dkey-23o4.6
lonrf1l	1.87e-05	0.267224	0.69	0.154	0.290603	2	lonrf1l
zgc:1099341	1.89e-05	0.873424	0.621	0.154	0.293867	2	zgc:109934
msi11	1.9e-05	0.768047	0.862	0.308	0.294761	2	msi1
coq8a	1.9e-05	0.614631	0.414	0.046	0.295362	2	coq8a
ccdc50	1.9e-05	0.512555	0.414	0.046	0.295362	2	ccdc50
wnk1b	2.02e-05	0.594102	0.414	0.046	0.312864	2	wnk1b
eno1b1	2.21e-05	0.681717	0.862	0.354	0.342404	2	eno1b
cobl1	2.4e-05	0.618796	0.483	0.077	0.37194	2	cobl
calm1a1	2.49e-05	0.601541	0.897	0.477	0.387038	2	calm1a
szrd1	2.6e-05	0.599766	0.31	0.015	0.402722	2	szrd1
btbd10a	2.6e-05	0.538252	0.31	0.015	0.402722	2	btbd10a
dscamb	2.72e-05	0.571392	0.448	0.062	0.421384	2	dscamb
bzw21	2.76e-05	0.565215	0.655	0.154	0.428606	2	bzw2
prr12a	2.78e-05	0.608007	0.31	0.015	0.43086	2	prr12a
FAM72B	2.78e-05	0.551718	0.31	0.015	0.43086	2	FAM72B
epb41l5	2.87e-05	0.527023	0.448	0.062	0.444656	2	epb41l5
rab3aa	2.87e-05	0.523643	0.828	0.231	0.445826	2	rab3aa
capza1a	2.97e-05	0.477159	0.31	0.015	0.46086	2	capza1a
flr	3.02e-05	0.580675	0.345	0.031	0.46863	2	flr
dgcr21	3.08e-05	0.723844	0.69	0.2	0.478017	2	dgcr2
gabrb31	3.09e-05	0.473751	0.552	0.108	0.479316	2	gabrb3
CR855860.1	3.1e-05	0.749347	0.483	0.077	0.481138	2	CR855860.1
si:dkey-172h23.21	3.1e-05	0.695843	0.621	0.154	0.481649	2	si:dkey-172h23.2
si:ch1073-111c8.31	3.2e-05	0.56155	0.966	0.785	0.496499	2	si:ch1073-111c8.3
eno21	3.35e-05	0.618467	0.793	0.231	0.51999	2	eno2
zbtb181	3.67e-05	0.656548	0.759	0.215	0.569956	2	zbtb18
selenos	3.74e-05	0.457919	0.448	0.062	0.580534	2	selenos
id2b	3.8e-05	0.549127	0.483	0.077	0.589777	2	id2b
tmco11	3.91e-05	0.692566	0.448	0.077	0.606353	2	tmco1
FAT4	4.11e-05	0.649714	0.345	0.031	0.637345	2	FAT4
cuedc1a1	4.66e-05	0.452831	0.655	0.154	0.722726	2	cuedc1a
samd111	4.67e-05	0.697618	0.655	0.2	0.725001	2	samd11
lrrn1	4.94e-05	0.422988	0.552	0.108	0.767037	2	lrrn1
add2	5.18e-05	0.544052	0.552	0.108	0.803466	2	add2
elavl1b	5.24e-05	0.526815	0.379	0.046	0.813758	2	elavl1b
map1ab1	5.47e-05	0.624649	0.897	0.508	0.848168	2	map1ab
sptbn51	5.8e-05	0.687061	0.483	0.092	0.900468	2	sptbn5
si:dkey-121a11.3	5.87e-05	0.544702	0.69	0.185	0.910272	2	si:dkey-121a11.3
hipk3a1	6.19e-05	0.635989	0.448	0.077	0.959964	2	hipk3a
dpm1	6.21e-05	0.583637	0.379	0.046	0.963089	2	dpm1
CU571318.1	6.39e-05	0.561046	0.483	0.092	0.992063	2	CU571318.1
2019-03-06	6.47e-05	0.417652	0.69	0.169	1	2	2019-03-06
insra1	6.6e-05	0.434468	0.552	0.123	1	2	insra
elmod11	6.6e-05	0.441353	0.586	0.123	1	2	elmod1
vps361	6.69e-05	0.45148	0.621	0.138	1	2	vps36
arl3l11	6.79e-05	0.634292	0.931	0.354	1	2	arl3l1
SNAP91 (1 of many)	7.2e-05	0.533701	0.414	0.062	1	2	SNAP91 (1 of many)
ajap1	7.39e-05	0.730921	0.483	0.092	1	2	ajap1
calr3a	7.48e-05	0.577801	0.276	0.015	1	2	calr3a
nipblb	7.48e-05	0.576484	0.276	0.015	1	2	nipblb
smtnb1	7.56e-05	0.527565	0.448	0.077	1	2	smtnb
atp8a21	8.13e-05	0.61309	0.483	0.092	1	2	atp8a2
ezrb	8.42e-05	0.549293	0.414	0.062	1	2	ezrb
fam13b	8.65e-05	0.561887	0.931	0.538	1	2	fam13b
si:ch211-114c12.21	9.42e-05	0.485105	0.517	0.108	1	2	si:ch211-114c12.2
pisd1	9.69e-05	0.261773	0.448	0.077	1	2	pisd
chd21	0.000101762	0.503162	0.448	0.077	1	2	chd2
fam174b	0.000104283	0.574559	0.276	0.015	1	2	fam174b
sh2b1	0.000104283	0.502462	0.276	0.015	1	2	sh2b1
CDH18	0.000104283	0.481616	0.276	0.015	1	2	CDH18
tapt1b	0.000109013	0.46602	0.414	0.062	1	2	tapt1b
si:dkey-118j18.2	0.000111377	0.551069	0.276	0.015	1	2	si:dkey-118j18.2
mgat1b	0.000111377	0.482149	0.276	0.015	1	2	mgat1b
ddc	0.000111377	0.432833	0.276	0.015	1	2	ddc
alkal1	0.000111377	0.426376	0.276	0.015	1	2	alkal1
agpat3	0.000111377	0.368814	0.276	0.015	1	2	agpat3
p4htm	0.000111377	0.362917	0.276	0.015	1	2	p4htm
abhd17c	0.000111377	0.297217	0.276	0.015	1	2	abhd17c
ppp4cb	0.000114741	0.413447	0.414	0.062	1	2	ppp4cb
rnf145b	0.000121975	0.597453	0.31	0.031	1	2	rnf145b
znf5361	0.000127829	0.590431	0.69	0.231	1	2	znf536
srsf111	0.000133691	0.600169	0.517	0.123	1	2	srsf11
tjp1b1	0.000133742	0.398537	0.552	0.123	1	2	tjp1b
minos11	0.000134223	0.55154	0.655	0.185	1	2	minos1
tpm11	0.00013628	0.46861	0.448	0.077	1	2	tpm1
pa2g4b	0.000137405	0.5074	0.31	0.031	1	2	pa2g4b
cdc14ab	0.000137778	0.444346	0.69	0.2	1	2	cdc14ab
unc119.21	0.000139695	0.685251	0.517	0.123	1	2	unc119.2
CABZ01117619.11	0.000141043	0.715653	0.586	0.169	1	2	CABZ01117619.1
madd	0.00014301	0.460107	0.448	0.077	1	2	madd
polr2a1	0.000148682	0.622366	0.759	0.246	1	2	polr2a
ppp1r13ba1	0.00015054	0.62511	0.724	0.231	1	2	ppp1r13ba
chchd101	0.000152701	0.51692	0.931	0.569	1	2	chchd10
psmc6	0.000154457	0.375564	0.517	0.108	1	2	psmc6
puf60a	0.00015466	0.569893	0.31	0.031	1	2	puf60a
nhsl1a1	0.000155145	0.58148	0.793	0.262	1	2	nhsl1a
tfg	0.000155982	0.48906	0.414	0.077	1	2	tfg
akap11	0.000157937	0.56452	0.345	0.046	1	2	akap11
ppp1cab	0.000162636	0.437797	0.655	0.2	1	2	ppp1cab
reep61	0.000166331	0.592093	0.517	0.123	1	2	reep6
zc3h11a	0.000166812	0.545588	0.345	0.046	1	2	zc3h11a
slc9a6a	0.000173941	0.494165	0.31	0.031	1	2	slc9a6a
cgnb	0.000173941	0.435961	0.31	0.031	1	2	cgnb
add3a	0.000177226	0.633737	0.379	0.062	1	2	add3a
cnppd1	0.000184265	0.342116	0.517	0.108	1	2	cnppd1
ccnl1a	0.000184408	0.346674	0.31	0.031	1	2	ccnl1a
arhgap20	0.000185988	0.349215	0.345	0.046	1	2	arhgap20
mid1ip1b	0.000186823	0.55117	0.793	0.292	1	2	mid1ip1b
purba	0.000187474	0.259629	0.69	0.2	1	2	purba
cica	0.000195465	0.388858	0.31	0.031	1	2	cica
tcea1	0.000195465	0.387712	0.31	0.031	1	2	tcea1
tmtops2a	0.000195465	0.375926	0.31	0.031	1	2	tmtops2a
ptpa	0.000195465	0.299097	0.31	0.031	1	2	ptpa
CR759918.1	0.000196335	0.466553	0.345	0.046	1	2	CR759918.1
stard7	0.000196335	0.426707	0.345	0.046	1	2	stard7
dennd5b	0.000206505	0.48607	0.379	0.062	1	2	dennd5b
si:ch73-386h18.1	0.000206505	0.471828	0.379	0.062	1	2	si:ch73-386h18.1
fkbp161	0.000208944	0.616785	0.69	0.231	1	2	fkbp16
man2a21	0.000216318	0.647162	0.448	0.092	1	2	man2a2
si:ch211-207i1.21	0.000223148	0.336305	0.552	0.123	1	2	si:ch211-207i1.2
kansl1a	0.000228485	0.526084	0.379	0.062	1	2	kansl1a
sh3glb2b	0.000230717	0.542956	0.345	0.046	1	2	sh3glb2b
itpr1b	0.000230717	0.525412	0.345	0.046	1	2	itpr1b
spag1a1	0.000231085	0.513152	0.483	0.108	1	2	spag1a
degs1	0.000243381	0.46655	0.345	0.046	1	2	degs1
MARK4	0.000243962	0.614631	0.724	0.231	1	2	MARK4
kctd7	0.000252647	0.520698	0.379	0.062	1	2	kctd7
zgc:162331	0.000252838	0.450975	0.414	0.077	1	2	zgc:162331
sec14l8	0.000259721	0.548456	0.448	0.092	1	2	sec14l8
rp1l1b	0.000259721	0.535752	0.448	0.092	1	2	rp1l1b
ckmt2b	0.000263592	0.486877	0.483	0.108	1	2	ckmt2b
cplx4c	0.000265145	0.454468	0.414	0.077	1	2	cplx4c
etfb	0.00027069	0.332783	0.345	0.046	1	2	etfb
atp1a3b1	0.000284876	0.490646	0.966	0.6	1	2	atp1a3b
sept8b	0.000285397	0.347673	0.345	0.046	1	2	sept8b
fam199x	0.000293422	0.539288	0.379	0.062	1	2	fam199x
arl3l21	0.000299734	0.526992	0.931	0.462	1	2	arl3l2
syne1a	0.000300348	0.449694	0.483	0.108	1	2	syne1a
chtopa1	0.000300348	0.412982	0.483	0.108	1	2	chtopa
farp21	0.000308933	0.277227	0.586	0.154	1	2	farp2
ube2l3b	0.000313631	0.372804	0.483	0.108	1	2	ube2l3b
stat2	0.000325474	0.376066	0.448	0.092	1	2	stat2
eif3ja	0.000330981	0.484933	0.517	0.138	1	2	eif3ja
camk2g21	0.000334651	0.550151	0.621	0.185	1	2	camk2g2
rps6kal	0.000334695	0.454894	0.276	0.031	1	2	rps6kal
pum3	0.000335557	0.471184	0.414	0.077	1	2	pum3
zgc:1231051	0.00034037	0.326769	0.448	0.092	1	2	zgc:123105
si:dkey-220f10.4	0.000351592	0.382942	0.414	0.077	1	2	si:dkey-220f10.4
unc119b1	0.000356138	0.589425	0.966	0.523	1	2	unc119b
eif1axa1	0.000358122	0.454623	0.552	0.138	1	2	eif1axa
si:ch211-63p21.1	0.000359467	0.631489	0.931	0.385	1	2	si:ch211-63p21.1
CR382370.2	0.000368342	0.452209	0.414	0.077	1	2	CR382370.2
samd7	0.000372093	0.442514	0.448	0.092	1	2	samd7
si:ch1073-155h21.2	0.000375826	0.657414	0.552	0.154	1	2	si:ch1073-155h21.2
asb5b	0.0003887	0.265767	0.483	0.108	1	2	asb5b
aqp9b1	0.000405601	0.407832	0.483	0.108	1	2	aqp9b
arhgap12b1	0.000412629	0.432409	0.621	0.169	1	2	arhgap12b
inpp5l	0.000443089	0.375701	0.414	0.077	1	2	inpp5l
ubqln4	0.000446709	0.545941	0.414	0.092	1	2	ubqln4
sap30bp	0.000447479	0.547588	0.276	0.031	1	2	sap30bp
syt5a1	0.00046121	0.53753	0.793	0.385	1	2	syt5a
ndufs8b	0.000466152	0.426233	0.655	0.2	1	2	ndufs8b
ccnyl1	0.000473925	0.448019	0.276	0.031	1	2	ccnyl1
per21	0.000481267	0.450962	0.931	0.385	1	2	per2
zgc:1099651	0.000500892	0.326002	0.483	0.108	1	2	zgc:109965
fam120c1	0.000500892	0.2642	0.483	0.108	1	2	fam120c
c1qbp	0.000542264	0.626474	0.31	0.046	1	2	c1qbp
msi2b	0.000543692	0.437098	0.621	0.185	1	2	msi2b
pnrc21	0.000544045	0.325698	1	0.815	1	2	pnrc2
etfa	0.000547675	0.48772	0.345	0.062	1	2	etfa
icmt1	0.000551412	0.619545	0.448	0.108	1	2	icmt
nus1	0.000562272	0.521717	0.276	0.031	1	2	nus1
otub1b	0.000562272	0.480126	0.276	0.031	1	2	otub1b
tmtc2a	0.000571392	0.454469	0.31	0.046	1	2	tmtc2a
cnga3a	0.000575154	0.65779	0.345	0.062	1	2	cnga3a
ddx19	0.000575154	0.501127	0.345	0.062	1	2	ddx19
ppa1b1	0.000590545	0.379229	0.724	0.246	1	2	ppa1b
usp47	0.000594977	0.387787	0.276	0.031	1	2	usp47
skia	0.000599691	0.425387	0.586	0.169	1	2	skia
tmem244	0.000599963	0.433893	0.655	0.2	1	2	tmem244
PDE3B	0.000601972	0.440244	0.31	0.046	1	2	PDE3B
ankhd1	0.000601972	0.425256	0.31	0.046	1	2	ankhd1
sucla2	0.000603912	0.493114	0.345	0.062	1	2	sucla2
tmsb1	0.000608442	0.526555	0.931	0.4	1	2	tmsb1
etnk1	0.000622468	0.423588	0.586	0.169	1	2	etnk1
mpc2	0.000629273	0.469696	0.621	0.185	1	2	mpc2
ppp1r7	0.000629446	0.287561	0.276	0.031	1	2	ppp1r7
wwp1	0.000642711	0.281892	0.483	0.108	1	2	wwp1
zgc:153441	0.000665487	0.469584	0.345	0.062	1	2	zgc:153441
sirt2	0.000665766	0.33008	0.276	0.031	1	2	sirt2
polr3h	0.000665766	0.307154	0.276	0.031	1	2	polr3h
CR759927.3	0.000665766	0.293712	0.276	0.031	1	2	CR759927.3
pdap1a	0.000665766	0.287445	0.276	0.031	1	2	pdap1a
casc4	0.000665766	0.280055	0.276	0.031	1	2	casc4
zbtb16b	0.000665766	0.267569	0.276	0.031	1	2	zbtb16b
erfl3	0.000666	0.300743	0.483	0.123	1	2	erfl3
eps15l1a	0.000667753	0.402282	0.31	0.046	1	2	eps15l1a
lman2	0.000672017	0.42072	0.379	0.077	1	2	lman2
ptmaa1	0.000680492	0.547664	0.897	0.615	1	2	ptmaa
rdh8b1	0.000693402	0.413109	0.483	0.123	1	2	rdh8b
rps6ka3a	0.000698417	0.413296	0.345	0.062	1	2	rps6ka3a
abhd8b	0.000703095	0.332058	0.31	0.046	1	2	abhd8b
serinc41	0.000704677	0.486469	0.655	0.231	1	2	serinc4
prmt1	0.000712562	0.345209	0.897	0.338	1	2	prmt1
znf706	0.000725661	0.323726	0.414	0.092	1	2	znf706
rbl2	0.000732857	0.319115	0.345	0.062	1	2	rbl2
si:ch73-1a9.31	0.000737282	0.413043	1	0.831	1	2	si:ch73-1a9.3
oga	0.000739816	0.502899	0.448	0.108	1	2	oga
prkacbb	0.000740168	0.5034	0.31	0.046	1	2	prkacbb
si:dkey-17e16.151	0.000741584	0.554086	0.69	0.246	1	2	si:dkey-17e16.15
shroom2a	0.000776913	0.353841	0.586	0.169	1	2	shroom2a
SMIM18	0.000779049	0.406941	0.31	0.046	1	2	SMIM18
rabl2	0.000779049	0.374156	0.31	0.046	1	2	rabl2
ube2al	0.000782023	0.309275	0.483	0.123	1	2	ube2al
trnau1apb	0.000805967	0.480283	0.379	0.077	1	2	trnau1apb
PKN2 (1 of many)	0.000805967	0.46038	0.379	0.077	1	2	PKN2 (1 of many)
whrna	0.000805967	0.360584	0.379	0.077	1	2	whrna
tmx3a	0.000806518	0.490044	0.345	0.062	1	2	tmx3a
cry1aa	0.0008186	0.417913	0.655	0.215	1	2	cry1aa
sh3bgrl2	0.00081982	0.399874	0.31	0.046	1	2	sh3bgrl2
tmem136b	0.000837584	0.523548	0.448	0.108	1	2	tmem136b
wdtc1	0.000843125	0.328863	0.379	0.077	1	2	wdtc1
aktip	0.000862563	0.340551	0.31	0.046	1	2	aktip
mef2d	0.00087275	0.406841	0.448	0.108	1	2	mef2d
alpl	0.000887	0.4954	0.345	0.062	1	2	alpl
scrn2	0.000887	0.366493	0.345	0.062	1	2	scrn2
stk35	0.000899887	0.529074	0.414	0.092	1	2	stk35
arvcfb	0.000899887	0.263774	0.414	0.092	1	2	arvcfb
dek	0.000907364	0.298557	0.31	0.046	1	2	dek
tmem198b	0.00091658	0.426378	0.483	0.123	1	2	tmem198b
tom1	0.000922254	0.475617	0.379	0.077	1	2	tom1
bsdc1	0.000922254	0.408678	0.379	0.077	1	2	bsdc1
svila	0.000923452	0.782142	0.345	0.077	1	2	svila
anapc11	0.000929975	0.439992	0.345	0.062	1	2	anapc11
opn4.11	0.000938924	0.353269	0.69	0.246	1	2	opn4.1
aanat1	0.00095342	0.387874	0.483	0.123	1	2	aanat1
ash1l	0.000974873	0.324046	0.345	0.062	1	2	ash1l
fam192a	0.000974873	0.317099	0.345	0.062	1	2	fam192a
cnep1r1	0.00097986	0.421214	0.414	0.092	1	2	cnep1r1
slc9a3r1a1	0.000999687	0.444066	0.517	0.138	1	2	slc9a3r1a
wbp2	0.00100822	0.412855	0.379	0.077	1	2	wbp2
ehd1a	0.00102177	0.297713	0.345	0.062	1	2	ehd1a
FQ311928.1	0.00103125	0.424718	0.483	0.123	1	2	FQ311928.1
si:dkey-28e7.3	0.00103125	0.369884	0.483	0.123	1	2	si:dkey-28e7.3
atp11a	0.00103833	0.284066	0.517	0.138	1	2	atp11a
ccdc47	0.00108543	0.544477	0.414	0.108	1	2	ccdc47
gramd2aa	0.00109018	0.59566	0.483	0.138	1	2	gramd2aa
gdpd5a	0.00112189	0.295784	0.345	0.062	1	2	gdpd5a
grtp1a	0.00115115	0.427359	0.379	0.077	1	2	grtp1a
ddx3b	0.00117599	0.544142	0.379	0.092	1	2	ddx3b
osbpl71	0.00119619	0.497691	0.897	0.492	1	2	osbpl7
stxbp1b1	0.00121135	0.453108	0.931	0.492	1	2	stxbp1b
ncor1	0.00125225	0.344788	0.483	0.123	1	2	ncor1
rapgef2	0.00125674	0.288845	0.448	0.108	1	2	rapgef2
tnrc6a1	0.00127171	0.467084	0.828	0.338	1	2	tnrc6a
leo1	0.00127422	0.457002	0.517	0.154	1	2	leo1
crx1	0.00128897	0.399692	0.966	0.754	1	2	crx
usp9	0.00130069	0.469169	0.586	0.2	1	2	usp9
tmem30ab1	0.00132034	0.494004	0.621	0.2	1	2	tmem30ab
prkar2aa	0.0013364	0.398472	0.379	0.092	1	2	prkar2aa
arpc3	0.00140507	0.353248	0.483	0.123	1	2	arpc3
iscub1	0.00140722	0.491311	0.897	0.477	1	2	iscub
bhlhe40	0.00141501	0.442841	1	0.692	1	2	bhlhe40
dnajc7	0.00145431	0.523934	0.379	0.092	1	2	dnajc7
si:ch211-226m16.2	0.00150333	0.623099	0.414	0.108	1	2	si:ch211-226m16.2
pacsin3	0.00155376	0.372126	0.31	0.062	1	2	pacsin3
rp1l1a1	0.00159549	0.395621	0.552	0.169	1	2	rp1l1a
thrap3b	0.00161664	0.513104	0.276	0.046	1	2	thrap3b
emc7	0.00162879	0.462236	0.414	0.108	1	2	emc7
jakmip2	0.0016507	0.538399	0.483	0.138	1	2	jakmip2
arglu1a1	0.00166953	0.258091	0.448	0.123	1	2	arglu1a
irf2bp2b	0.0016799	0.337303	0.586	0.185	1	2	irf2bp2b
mta21	0.00169507	0.383046	0.414	0.108	1	2	mta2
pcbp2	0.00171302	0.395187	0.483	0.138	1	2	pcbp2
ddx23	0.00172972	0.419126	0.345	0.077	1	2	ddx23
hacd2	0.00174593	0.298734	0.655	0.215	1	2	hacd2
pde6d1	0.00177519	0.321376	0.793	0.292	1	2	pde6d
zgc:193541	0.0017838	0.574447	0.897	0.523	1	2	zgc:193541
cbx1a	0.00178695	0.474492	0.31	0.062	1	2	cbx1a
hdlbpa	0.00180693	0.354635	0.345	0.077	1	2	hdlbpa
zgc:112982	0.00180693	0.354427	0.345	0.077	1	2	zgc:112982
zfhx4	0.00184418	0.286851	0.483	0.138	1	2	zfhx4
ptges3a	0.00186794	0.42369	0.379	0.092	1	2	ptges3a
stx12	0.0018779	0.346624	0.276	0.046	1	2	stx12
prph2b1	0.00196424	0.359639	1	0.631	1	2	prph2b
si:dkey-13i19.8	0.00201953	0.350462	0.448	0.123	1	2	si:dkey-13i19.8
eif4a1a	0.00204215	0.322314	0.517	0.169	1	2	eif4a1a
brdt	0.00206525	0.313427	0.414	0.108	1	2	brdt
insb	0.00207304	1.07413	0.276	0.046	1	2	insb
ik	0.00211302	0.374277	0.379	0.092	1	2	ik
ptbp2b	0.00217743	0.337716	0.276	0.046	1	2	ptbp2b
slc4a4a	0.00220087	0.352051	0.379	0.092	1	2	slc4a4a
atf6	0.0022425	0.403708	0.345	0.077	1	2	atf6
si:dkey-28b4.8	0.00224812	0.416463	0.31	0.062	1	2	si:dkey-28b4.8
nr1d2b1	0.00224881	0.470896	0.828	0.338	1	2	nr1d2b
clstn3	0.00228662	0.446763	0.276	0.046	1	2	clstn3
mthfd21	0.00232157	0.371883	0.414	0.108	1	2	mthfd2
glmnb1	0.00234436	0.258305	0.517	0.154	1	2	glmnb
srebf2	0.00235252	0.404366	0.31	0.062	1	2	srebf2
ablim31	0.00235319	0.413584	0.759	0.277	1	2	ablim3
nucb2a1	0.00235319	0.274252	0.759	0.277	1	2	nucb2a
si:ch211-207l14.11	0.00236459	0.363053	0.759	0.308	1	2	si:ch211-207l14.1
cyth3a	0.00240081	0.281116	0.276	0.046	1	2	cyth3a
arl13b	0.00244252	0.394095	0.345	0.077	1	2	arl13b
safb	0.00248218	0.486382	0.414	0.123	1	2	safb
per1a1	0.0025083	0.328869	0.414	0.108	1	2	per1a
spsb3a	0.0025202	0.416521	0.276	0.046	1	2	spsb3a
man1b1a	0.0025202	0.354008	0.276	0.046	1	2	man1b1a
kcnv2a1	0.00254362	0.350478	0.69	0.246	1	2	kcnv2a
asna1	0.00254507	0.284791	0.586	0.2	1	2	asna1
tmem106ba1	0.00254555	0.2963	0.793	0.277	1	2	tmem106ba
gal3st4	0.00254841	0.265528	0.345	0.077	1	2	gal3st4
tm9sf3	0.00258782	0.286183	0.379	0.092	1	2	tm9sf3
ggnbp2	0.00264469	0.37223	0.276	0.046	1	2	ggnbp2
ezh1	0.00264499	0.386335	0.276	0.046	1	2	ezh1
schip1	0.00264499	0.296283	0.276	0.046	1	2	schip1
gpr107	0.0026585	0.361172	0.345	0.077	1	2	gpr107
parp1	0.0026585	0.331693	0.345	0.077	1	2	parp1
chchd21	0.00268636	0.419806	0.552	0.185	1	2	chchd2
si:ch211-51e12.71	0.00269755	0.387339	0.621	0.215	1	2	si:ch211-51e12.7
tesk2	0.00277291	0.318346	0.345	0.077	1	2	tesk2
tra2b	0.00277541	0.307036	0.276	0.046	1	2	tra2b
max	0.00278435	0.392066	0.517	0.169	1	2	max
timm10	0.00281608	0.268477	0.31	0.062	1	2	timm10
rab1bb	0.00291763	0.365974	0.379	0.092	1	2	rab1bb
plekho1b	0.00295197	0.445653	0.724	0.308	1	2	plekho1b
hmgn31	0.00296531	0.417052	0.69	0.246	1	2	hmgn3
sumo3b1	0.00303581	0.327958	0.379	0.092	1	2	sumo3b
tra2a	0.00308214	0.392243	0.517	0.169	1	2	tra2a
FP017274.11	0.00313447	0.75227	0.483	0.185	1	2	FP017274.1
FO904901.11	0.00316846	0.458025	0.552	0.185	1	2	FO904901.1
neurl1aa	0.00321691	0.290871	0.31	0.062	1	2	neurl1aa
dgkzb	0.00321691	0.266716	0.31	0.062	1	2	dgkzb
TOM1L2	0.00321691	0.257232	0.31	0.062	1	2	TOM1L2
uqcrc2b	0.00327694	0.267999	0.345	0.077	1	2	uqcrc2b
CR354588.1	0.00328539	0.266798	0.379	0.092	1	2	CR354588.1
ywhabl	0.00338186	0.558379	0.862	0.462	1	2	ywhabl
slkb	0.00345084	0.419146	0.966	0.585	1	2	slkb
fbxo9	0.00347766	0.346888	0.483	0.154	1	2	fbxo9
prdx51	0.00359186	0.295954	0.655	0.231	1	2	prdx5
uqcrb	0.00398671	0.348367	0.448	0.138	1	2	uqcrb
CABZ01102170.11	0.00401725	0.403219	0.414	0.123	1	2	CABZ01102170.1
hmga1b	0.00401725	0.312876	0.414	0.123	1	2	hmga1b
lactbl1b1	0.00410578	0.261287	0.552	0.185	1	2	lactbl1b
insig1	0.0042215	0.372999	0.379	0.108	1	2	insig1
pfdn5	0.00425063	0.258899	0.276	0.062	1	2	pfdn5
sgip1a	0.00455165	0.279702	0.759	0.292	1	2	sgip1a
leng8	0.00456035	0.257389	0.483	0.154	1	2	leng8
nfs1	0.00498236	0.340953	0.414	0.123	1	2	nfs1
eif4g1a	0.00500258	0.367325	0.345	0.092	1	2	eif4g1a
rap1aa	0.00507139	0.464508	0.276	0.062	1	2	rap1aa
kcnb21	0.00509206	0.36326	0.966	0.538	1	2	kcnb2
arrdc3a	0.00510009	0.256244	0.724	0.292	1	2	arrdc3a
glyr1	0.00529006	0.32224	0.31	0.077	1	2	glyr1
ppp2r5cb	0.0052978	0.393436	0.276	0.062	1	2	ppp2r5cb
eif1axb	0.00535814	0.344736	0.621	0.231	1	2	eif1axb
tm9sf2	0.00543709	0.314902	0.448	0.138	1	2	tm9sf2
plxnb1a	0.00550996	0.467208	0.31	0.077	1	2	plxnb1a
gstr	0.0055333	0.355191	0.276	0.062	1	2	gstr
hagh	0.00561666	0.306297	0.345	0.092	1	2	hagh
p4hb	0.00561666	0.261857	0.345	0.092	1	2	p4hb
CU694197.11	0.0056529	0.257882	0.517	0.185	1	2	CU694197.1
kdm5ba	0.0057375	0.276051	0.414	0.123	1	2	kdm5ba
chd9	0.00574897	0.298596	0.483	0.154	1	2	chd9
impdh1a1	0.00603112	0.332866	0.724	0.292	1	2	impdh1a
dguok	0.00603284	0.357472	0.276	0.062	1	2	dguok
copz2	0.00603284	0.287642	0.276	0.062	1	2	copz2
si:ch211-253b8.5	0.00622004	0.27646	0.31	0.077	1	2	si:ch211-253b8.5
nolc1	0.00629754	0.363301	0.276	0.062	1	2	nolc1
si:dkey-19e4.5	0.00629754	0.318579	0.276	0.062	1	2	si:dkey-19e4.5
DYRK3	0.00633335	0.298616	0.379	0.108	1	2	DYRK3
ndufa12	0.00654107	0.4013	0.345	0.092	1	2	ndufa12
cfl2	0.00657265	0.335121	0.276	0.062	1	2	cfl2
map1lc3a	0.00683877	0.347372	0.655	0.262	1	2	map1lc3a
zgc:77752	0.00685853	0.318015	0.276	0.062	1	2	zgc:77752
si:ch211-13c6.2	0.00685853	0.310489	0.276	0.062	1	2	si:ch211-13c6.2
ache	0.00685853	0.282985	0.276	0.062	1	2	ache
vcp	0.00698281	0.274941	0.483	0.154	1	2	vcp
nme3	0.00698281	0.25556	0.483	0.154	1	2	nme3
si:dkeyp-72e1.91	0.00702788	0.376699	0.517	0.185	1	2	si:dkeyp-72e1.9
slc1a2b	0.00715552	0.258139	0.276	0.062	1	2	slc1a2b
stk35l	0.00729251	0.451978	0.414	0.138	1	2	stk35l
ubtd1a	0.00731074	0.273377	0.414	0.123	1	2	ubtd1a
ubald1a	0.0076157	0.278453	0.69	0.277	1	2	ubald1a
faf2	0.00778437	0.396677	0.276	0.062	1	2	faf2
fhod3b1	0.00784997	0.296631	0.379	0.108	1	2	fhod3b
atp5f1b	0.00790267	0.320324	0.931	0.492	1	2	atp5f1b
rbp4l1	0.00799497	0.316541	1	0.969	1	2	rbp4l
si:ch211-132b12.7	0.00801212	0.266467	0.828	0.354	1	2	si:ch211-132b12.7
PLEKHB11	0.00805065	0.352726	0.828	0.446	1	2	PLEKHB1
zgc:664331	0.00822218	0.33167	0.793	0.369	1	2	zgc:66433
serf2	0.00824677	0.264071	0.655	0.246	1	2	serf2
si:ch211-285j22.31	0.00829419	0.297549	0.931	0.462	1	2	si:ch211-285j22.3
ptdss21	0.00864084	0.251529	0.448	0.154	1	2	ptdss2
CR925756.1	0.00865006	0.343361	0.379	0.123	1	2	CR925756.1
uckl1b	0.00882067	0.274957	0.276	0.062	1	2	uckl1b
clcn3	0.00890128	0.266321	0.414	0.138	1	2	clcn3
eif3s10	0.00895115	0.341278	0.379	0.123	1	2	eif3s10
map7d3	0.0089613	0.424924	0.517	0.185	1	2	map7d3
slc38a5a1	0.00901203	0.263432	0.897	0.431	1	2	slc38a5a
prrc2a	0.00919827	0.399031	0.414	0.138	1	2	prrc2a
aplp21	0.00927279	0.408796	0.897	0.477	1	2	aplp2
lin7c1	0.00930767	0.28431	0.483	0.169	1	2	lin7c
foxo41	0.0093871	0.297381	0.793	0.338	1	2	foxo4
camk1db	0.00947132	0.413628	0.828	0.462	1	2	camk1db
atp5f1c1	0.0095034	0.250034	0.448	0.154	1	2	atp5f1c
pcna	0.0098189	0.328129	0.414	0.138	1	2	pcna

## Sheet: all LWS2 transcripts
	p_val	avg_logFC	pct.1	pct.2	p_val_adj	cluster
mt-co3	1.12e-11	0.876667	0.977	1	1.74e-07	0
mt-atp6	3.69e-11	0.694547	1	1	5.72e-07	0
mt-nd3	3.22e-10	0.711325	0.977	0.955	4.99e-06	0
mt-co1	4.46e-10	0.660284	0.989	1	6.92e-06	0
mt-cyb	4.16e-09	0.518247	1	1	6.46e-05	0
mt-co2	5.78e-09	0.486621	1	1	8.97e-05	0
mt-nd1	3.04e-08	0.547818	0.977	0.982	0.000471289	0
mt-nd4	4.5e-08	0.561944	0.966	0.973	0.000698593	0
gnb3b	3.77e-07	0.696474	0.886	0.622	0.00584405	0
atp1b2b	1.73e-06	0.498094	0.966	0.685	0.0268429	0
arr3b	1.08e-05	1.18966	0.625	0.378	0.167936	0
mt-atp8	2.48e-05	0.5421	0.705	0.568	0.384911	0
mt-nd2	3.27e-05	0.347946	0.943	0.964	0.506921	0
pdcb	4.74e-05	0.550242	0.875	0.64	0.735809	0
gngt2b	5.26e-05	0.601534	0.92	0.694	0.815716	0
slc25a3a	5.9e-05	0.793328	0.636	0.441	0.914727	0
mt-nd5	0.000112481	0.429956	0.864	0.793	1	0
guca1c	0.0003474	0.440943	0.841	0.631	1	0
arr3a	0.00064331	0.445734	0.886	0.694	1	0
prph2b	0.000893302	0.441673	0.818	0.577	1	0
atp2b1b	0.00109106	0.607716	0.693	0.568	1	0
gnb5b	0.00111537	0.459244	0.818	0.64	1	0
prph2a	0.00118276	0.436624	0.705	0.532	1	0
slc24a2	0.00119875	0.439998	0.739	0.532	1	0
camk1gb	0.00144304	0.373304	0.886	0.694	1	0
arl3l2	0.00179041	0.38274	0.705	0.486	1	0
slc1a2a	0.00188552	0.456674	0.75	0.577	1	0
mt-nd4l	0.00204044	0.464773	0.625	0.495	1	0
es1	0.0023838	0.363948	0.784	0.613	1	0
ppm1na	0.00472206	0.506984	0.682	0.559	1	0
gnat2	0.00597522	0.375315	0.807	0.586	1	0
ncaldb	0.00644721	0.4437	0.67	0.523	1	0
hif1ab	0.00689258	0.421936	0.784	0.712	1	0
laptm4b	0.00732907	0.278459	0.955	0.82	1	0
scamp5b	0.00779722	0.481128	0.523	0.441	1	0
crx	0.00782745	0.346592	0.852	0.676	1	0
kcnb2	0.00789678	0.36466	0.773	0.595	1	0
rbp4l	0.00791632	0.356241	1	0.973	1	0
si:dkey-97a13.12	0.00809337	0.387245	0.67	0.514	1	0
rcvrn3	0.00847546	0.323727	0.784	0.613	1	0
usp21	0.0085773	0.446646	0.511	0.405	1	0
grk1a	4.37e-16	1.12473	0.951	0.391	6.77e-12	1
pde6ha	1.55e-15	0.740511	1	0.986	2.4e-11	1
pde6b	5.44e-15	1.08962	0.902	0.442	8.44e-11	1
rbp3	5.82e-14	0.850693	1	0.674	9.02e-10	1
pdca	6.77e-14	0.914521	1	0.667	1.05e-09	1
saga	9.15e-14	0.949838	0.967	0.58	1.42e-09	1
pde6a	2.05e-13	0.925612	0.951	0.522	3.18e-09	1
gnat1	2.64e-13	0.866651	1	0.739	4.1e-09	1
si:ch211-195b15.7	2.75e-13	1.00068	0.852	0.29	4.26e-09	1
si:ch1073-111c8.3	6.87e-13	0.740038	0.984	0.768	1.07e-08	1
rho	1.85e-12	0.789156	1	0.942	2.86e-08	1
sagb	2.19e-12	0.871029	0.967	0.717	3.41e-08	1
gnb1b	6.51e-12	0.872614	0.967	0.761	1.01e-07	1
rom1a	6.58e-12	0.919208	0.918	0.457	1.02e-07	1
abca4b	1.88e-11	0.798829	0.836	0.275	2.92e-07	1
ppdpfa	1.89e-11	0.529027	1	0.906	2.94e-07	1
oxr1b	2.29e-11	0.803486	0.787	0.232	3.56e-07	1
eno1b	2.37e-11	0.823806	0.852	0.304	3.67e-07	1
pde6c	8.52e-11	0.658408	0.984	0.551	1.32e-06	1
ndrg1a	1.15e-10	0.753343	0.902	0.428	1.78e-06	1
si:ch211-207l14.1	2.58e-10	0.745134	0.918	0.348	4.01e-06	1
mbnl2	3.38e-10	0.789937	0.82	0.326	5.25e-06	1
guca1a	3.39e-10	0.80075	0.607	0.138	5.25e-06	1
slkb	4.25e-10	0.769772	0.902	0.442	6.6e-06	1
elovl4b	4.38e-10	0.689968	0.984	0.543	6.8e-06	1
gngt1	4.46e-10	0.637825	1	0.92	6.92e-06	1
slc7a3a	5.59e-10	0.747865	0.672	0.181	8.68e-06	1
opn4.1	6.81e-10	0.681546	0.738	0.21	1.06e-05	1
gnb1a	1.7e-09	0.714671	0.934	0.732	2.64e-05	1
si:ch211-114c12.21	2.01e-09	0.661474	0.475	0.087	3.12e-05	1
thrb	2.28e-09	0.645209	0.721	0.232	3.54e-05	1
map1ab	2.48e-09	0.595365	0.967	0.565	3.84e-05	1
prom1a	2.64e-09	0.707583	0.852	0.362	4.1e-05	1
si:ch1073-155h21.2	2.7e-09	0.690488	0.574	0.123	4.2e-05	1
si:dkey-121a11.3	4.06e-09	0.697245	0.656	0.196	6.29e-05	1
grk7a	4.52e-09	0.681054	0.984	0.558	7.01e-05	1
fam13b	4.68e-09	0.70665	0.869	0.551	7.26e-05	1
rbp4l1	5.56e-09	0.456845	1	0.978	8.63e-05	1
prom1b	6.11e-09	0.737368	0.836	0.362	9.47e-05	1
unc119b	6.49e-09	0.726799	0.918	0.457	0.000100776	1
pde6gb	7.54e-09	0.622483	1	0.862	0.000116929	1
PLEKHB1	8.31e-09	0.668936	0.869	0.362	0.000128986	1
osbpl7	8.86e-09	0.713378	0.82	0.348	0.000137415	1
gabra6a	9.47e-09	0.653588	0.492	0.101	0.000146876	1
paplna	1.02e-08	0.589985	0.82	0.297	0.000157905	1
six7	1.02e-08	0.620515	0.82	0.29	0.000158581	1
rom1b	1.48e-08	0.603692	0.902	0.478	0.000230138	1
vps36	1.94e-08	0.594084	0.574	0.152	0.000301778	1
gucy2f	2.54e-08	0.678612	0.803	0.312	0.000394199	1
rcvrn2	3.12e-08	0.602227	0.967	0.565	0.000483954	1
pde6d	3.14e-08	0.583238	0.705	0.239	0.000487127	1
samd11	3.4e-08	0.761291	0.574	0.167	0.000527279	1
ppp1r13ba	5.54e-08	0.590438	0.639	0.203	0.000859983	1
2019-03-06	5.97e-08	0.469187	0.59	0.159	0.00092583	1
ablim3	7.75e-08	0.676213	0.607	0.188	0.00120323	1
tdrd7b	8.68e-08	0.616696	0.541	0.145	0.00134714	1
CABZ01056321.1	9.01e-08	0.609226	0.557	0.152	0.00139837	1
eps8a	1.14e-07	0.616624	0.426	0.087	0.00176367	1
CR855860.11	1.21e-07	0.73045	0.492	0.13	0.00187617	1
dyrk4	1.24e-07	0.616594	0.705	0.246	0.00192193	1
si:ch211-113d22.2	1.25e-07	0.348082	1	0.855	0.00193852	1
schip1	1.27e-07	0.622347	0.311	0.043	0.00196575	1
cngb3.1	1.42e-07	0.505671	0.59	0.174	0.00220215	1
guca1b	1.46e-07	0.547949	0.951	0.543	0.00226692	1
coro1b	1.6e-07	0.4815	0.459	0.101	0.00247705	1
cpe	2e-07	0.509305	0.951	0.71	0.00311004	1
stxbp1b	2.01e-07	0.596868	0.869	0.449	0.00311889	1
camk1db	2.09e-07	0.575422	0.852	0.384	0.00324874	1
nin	2.22e-07	0.442447	0.902	0.406	0.0034415	1
si:ch211-226m16.2	2.34e-07	0.513432	0.459	0.101	0.00363278	1
limch1b	2.72e-07	0.698469	0.377	0.072	0.00422179	1
guk1b	2.8e-07	0.47525	0.803	0.341	0.00435004	1
gnat21	3.46e-07	0.518329	0.967	0.558	0.00536495	1
ppm1na1	3.63e-07	0.413171	0.984	0.449	0.00563713	1
dclk2a	3.93e-07	0.476029	0.902	0.406	0.00609093	1
rcvrn31	3.96e-07	0.565355	1	0.551	0.00613938	1
skia	4.18e-07	0.637647	0.508	0.152	0.00648558	1
kcnb21	4.25e-07	0.464863	0.984	0.536	0.00659812	1
jakmip21	4.32e-07	0.48372	0.574	0.174	0.0066965	1
zgc:195245	4.57e-07	0.546879	0.77	0.29	0.00709037	1
leo1	4.74e-07	0.639211	0.508	0.152	0.0073608	1
si:ch211-212k18.4	5e-07	0.607073	0.525	0.152	0.00775864	1
rp1l1b	5.03e-07	0.573159	0.492	0.13	0.00780015	1
nhsl1a	5.08e-07	0.664534	0.689	0.29	0.00788347	1
lactbl1a	5.08e-07	0.598404	0.459	0.116	0.0078843	1
PKN2 (1 of many)	5.47e-07	0.52894	0.443	0.101	0.00849088	1
dgcr2	5.5e-07	0.619145	0.656	0.261	0.00853022	1
itpr1b	6.19e-07	0.523115	0.377	0.072	0.00960438	1
arl31	6.52e-07	0.555388	0.475	0.13	0.0101197	1
shroom2a	7.15e-07	0.42622	0.541	0.152	0.0110876	1
agpat3	7.16e-07	0.585335	0.377	0.08	0.0111109	1
cnga1b	7.64e-07	0.360248	0.803	0.362	0.0118556	1
AL590149.1	7.67e-07	0.571118	0.328	0.058	0.0118978	1
pex5	7.91e-07	0.498391	0.82	0.37	0.0122743	1
cplx4c	8.17e-07	0.572973	0.279	0.036	0.0126811	1
arl3l1	8.56e-07	0.472152	0.836	0.384	0.0132819	1
alpl	8.59e-07	0.551398	0.279	0.036	0.0133336	1
hdlbpa	8.81e-07	0.478292	0.311	0.051	0.013672	1
hnrnpa1b	9.13e-07	0.434682	0.705	0.268	0.0141711	1
arr3a1	9.45e-07	0.507217	1	0.681	0.0146549	1
ajap1	1.23e-06	0.580879	0.459	0.123	0.0190495	1
cdk5r2b	1.27e-06	0.504486	0.836	0.362	0.0196359	1
atp1a3b	1.31e-06	0.436212	0.951	0.645	0.0203256	1
spag1a	1.33e-06	0.605543	0.426	0.109	0.0206385	1
znf536	1.34e-06	0.608697	0.705	0.304	0.0207971	1
zgc:198419	1.35e-06	0.491847	0.607	0.188	0.0209311	1
myo3a	1.55e-06	0.423651	0.59	0.196	0.0240242	1
foxo4	1.6e-06	0.53099	0.82	0.341	0.0247949	1
grk1b	1.62e-06	0.541344	0.443	0.109	0.0251474	1
si:dkey-97a13.121	1.64e-06	0.518212	0.902	0.442	0.0254753	1
zgc:162144	1.64e-06	0.538181	0.82	0.471	0.0254836	1
scrn21	1.67e-06	0.532505	0.377	0.087	0.0258803	1
faimb	1.72e-06	0.511222	0.59	0.196	0.0266809	1
fbxo9	1.76e-06	0.553003	0.492	0.145	0.0273616	1
zgc:112334	1.77e-06	0.446425	0.41	0.094	0.0274813	1
prph2b1	1.9e-06	0.452365	0.967	0.558	0.0294096	1
glmnb	1.92e-06	0.440183	0.492	0.13	0.0297413	1
cnga3a	2.09e-06	0.596464	0.41	0.101	0.0324641	1
cdk11b	2.18e-06	0.511635	0.361	0.08	0.0338497	1
arfgef1	2.46e-06	0.358175	0.361	0.08	0.0382287	1
retreg3	2.54e-06	0.52101	0.492	0.152	0.0394702	1
tulp1b	2.82e-06	0.427812	0.672	0.246	0.0436956	1
tmem120a	2.98e-06	0.575206	0.279	0.043	0.046307	1
ppp2r5d1	3.07e-06	0.528099	0.492	0.152	0.0475816	1
ehd1a	3.07e-06	0.483473	0.328	0.065	0.0476581	1
mdh1ab	3.09e-06	0.459727	0.869	0.406	0.0479371	1
pdha1b	3.14e-06	0.403402	0.492	0.145	0.0487324	1
insra	3.21e-06	0.498149	0.377	0.087	0.0497337	1
oga1	3.22e-06	0.573835	0.443	0.13	0.0499972	1
tmem237a	3.37e-06	0.518784	0.656	0.246	0.052329	1
tulp1a	3.43e-06	0.485867	0.459	0.13	0.0532848	1
ndrg1b	3.51e-06	0.502855	0.689	0.275	0.0544637	1
FO904901.1	3.66e-06	0.548453	0.557	0.181	0.0568624	1
opn1lw2	4.04e-06	0.594445	1	1	0.0626789	1
zgc:77752	4.33e-06	0.431249	0.295	0.051	0.0671415	1
rdh8b	4.48e-06	0.439376	0.344	0.072	0.069576	1
zdhhc2	4.52e-06	0.481062	0.311	0.058	0.0700786	1
reep6	4.66e-06	0.567081	0.443	0.13	0.0722916	1
si:ch211-133l5.7	4.78e-06	0.446262	0.459	0.13	0.0741367	1
prlra	4.85e-06	0.537222	0.721	0.304	0.0753059	1
nucb2a	5e-06	0.500123	0.705	0.297	0.0775805	1
icmt	5.08e-06	0.598964	0.443	0.13	0.0788598	1
papd5	5.32e-06	0.522245	0.508	0.167	0.0825946	1
slc1a2a1	5.57e-06	0.398622	0.984	0.507	0.0864043	1
cnga1a	5.72e-06	0.32442	0.705	0.297	0.088722	1
cep290	5.83e-06	0.587569	0.459	0.145	0.0904283	1
arvcfb	6.27e-06	0.374435	0.393	0.101	0.0972589	1
sept8b	6.32e-06	0.580115	0.295	0.058	0.0980951	1
mao	6.42e-06	0.537203	0.41	0.116	0.0995388	1
rp1l1a	6.8e-06	0.586918	0.557	0.203	0.105447	1
tapt1b1	6.83e-06	0.464483	0.377	0.094	0.105989	1
si:cabz01076231.1	7.03e-06	0.373041	0.77	0.326	0.109125	1
gngt2b1	7.3e-06	0.339657	1	0.703	0.113236	1
si:dkey-172h23.2	8.06e-06	0.254351	0.607	0.203	0.125064	1
camk1gb1	8.2e-06	0.43983	1	0.681	0.127196	1
eno21	8.68e-06	0.418706	0.754	0.326	0.134711	1
FAT4	9.09e-06	0.514345	0.295	0.058	0.141	1
arl13a	9.6e-06	0.452217	0.836	0.391	0.14903	1
tmsb1	9.79e-06	0.492917	0.852	0.464	0.151966	1
pdcb1	9.88e-06	0.384316	1	0.63	0.153327	1
chac1	1.08e-05	0.493483	0.852	0.587	0.167451	1
cdc14ab	1.08e-05	0.511181	0.557	0.21	0.167622	1
add2	1.1e-05	0.466146	0.492	0.167	0.170688	1
CABZ01117619.1	1.11e-05	0.393719	0.607	0.21	0.172571	1
rdh8a	1.12e-05	0.547386	0.459	0.159	0.173248	1
abhd8b	1.15e-05	0.372025	0.295	0.058	0.177764	1
slc24a21	1.15e-05	0.449604	0.918	0.493	0.178635	1
spsb3a	1.2e-05	0.378444	0.262	0.043	0.186681	1
laptm4b1	1.28e-05	0.359278	1	0.826	0.198572	1
tpd52l2a	1.36e-05	0.442027	0.541	0.196	0.210974	1
rp2	1.41e-05	0.416881	0.459	0.138	0.21886	1
si:ch211-285j22.3	1.43e-05	0.379447	0.869	0.457	0.22119	1
pisd	1.43e-05	0.383358	0.41	0.116	0.222635	1
guca1c1	1.47e-05	0.453116	0.984	0.609	0.2276	1
slc9a3r1a	1.47e-05	0.511571	0.361	0.094	0.227902	1
rgs9b	1.5e-05	0.410522	0.82	0.341	0.232059	1
gramd1a1	1.58e-05	0.462504	0.361	0.094	0.245164	1
crx1	1.67e-05	0.392932	0.951	0.667	0.258877	1
adipor2	1.75e-05	0.456105	0.639	0.246	0.271702	1
lrp2a	1.76e-05	0.357229	0.262	0.043	0.272716	1
CU659670.1	1.77e-05	0.457837	0.475	0.152	0.275199	1
ppa1b	1.8e-05	0.293462	0.656	0.261	0.278843	1
ndufs8b	1.8e-05	0.386259	0.557	0.203	0.279032	1
si:ch1073-303d10.1	1.87e-05	0.365034	0.869	0.435	0.290325	1
pfkpb	1.87e-05	0.48778	0.41	0.123	0.290889	1
slc16a6b	1.91e-05	0.334024	0.426	0.116	0.295819	1
slc38a5a	2.02e-05	0.462324	0.738	0.348	0.313697	1
tmem136b	2.02e-05	0.451697	0.426	0.13	0.313958	1
gnb5b1	2.04e-05	0.351488	0.984	0.601	0.316342	1
BX004774.2	2.2e-05	0.312557	0.508	0.167	0.342099	1
zgc:109934	2.32e-05	0.376844	0.557	0.196	0.360129	1
DYRK3	2.33e-05	0.403221	0.41	0.123	0.361539	1
serinc4	2.34e-05	0.43439	0.541	0.203	0.362757	1
per2	2.44e-05	0.342376	0.836	0.406	0.37931	1
si:ch211-207i1.2	2.57e-05	0.297631	0.508	0.167	0.398032	1
kdm3b	2.71e-05	0.458644	0.328	0.08	0.42098	1
cox4i2	2.79e-05	0.443468	0.525	0.196	0.433331	1
wwp1	2.8e-05	0.381301	0.295	0.065	0.43447	1
man2a2	2.82e-05	0.46589	0.459	0.152	0.437596	1
pik3r3a	3.01e-05	0.393072	0.361	0.094	0.467721	1
ubiad1	3.12e-05	0.350459	0.541	0.196	0.484191	1
clul1	3.2e-05	0.419651	0.869	0.413	0.496072	1
ncaldb1	3.51e-05	0.384981	0.869	0.464	0.545293	1
rgs9bp	3.52e-05	0.360837	0.443	0.138	0.546128	1
zgc:92107	3.54e-05	0.356971	0.295	0.065	0.549987	1
rps20	3.66e-05	0.262866	0.967	0.797	0.568186	1
inaa	4.21e-05	0.337487	0.803	0.37	0.653659	1
atp11a	4.27e-05	0.416055	0.41	0.13	0.662716	1
pag1	4.33e-05	0.393142	0.328	0.087	0.672334	1
prph2a1	4.4e-05	0.349405	0.934	0.464	0.682481	1
CT573282.1	4.44e-05	0.548763	0.393	0.123	0.688402	1
dnajc5ga	4.45e-05	0.535219	0.639	0.304	0.690937	1
lrrn1	4.46e-05	0.384065	0.443	0.145	0.692029	1
tbc1d24	4.57e-05	0.449644	0.311	0.08	0.709585	1
b4galt6	4.67e-05	0.534241	0.443	0.152	0.723824	1
dgkab	4.74e-05	0.334892	0.295	0.065	0.735617	1
si:dkey-7n6.2	4.76e-05	0.392569	0.459	0.159	0.737879	1
pde6ga	4.83e-05	0.298904	0.885	0.514	0.749266	1
ca7	4.93e-05	0.430214	0.295	0.065	0.764451	1
plxnb1a	5.39e-05	0.392399	0.393	0.123	0.835934	1
hacd2	5.51e-05	0.343659	0.525	0.188	0.855078	1
ncoa51	5.52e-05	0.403514	0.393	0.13	0.856951	1
gngt2a	5.81e-05	0.438413	0.984	0.565	0.902151	1
syne1a	5.83e-05	0.424194	0.508	0.203	0.905174	1
hdac9b	6.03e-05	0.364225	0.623	0.254	0.93545	1
farp2	6.13e-05	0.423656	0.475	0.181	0.950854	1
rab3aa	6.23e-05	0.351015	0.656	0.275	0.966116	1
polr2a	6.41e-05	0.405964	0.623	0.261	0.994545	1
gpsm2	6.52e-05	0.368505	0.377	0.116	1	1
bglapl	6.56e-05	0.303624	0.311	0.072	1	1
ewsr1a	6.8e-05	0.405655	0.623	0.268	1	1
nme2a	7.48e-05	0.338241	0.754	0.37	1	1
gabrb31	7.6e-05	0.381185	0.525	0.196	1	1
pip5k1cb	7.61e-05	0.370955	0.426	0.145	1	1
opn1mw1	7.71e-05	1.09904	0.41	0.159	1	1
rps6kal	8.26e-05	0.384039	0.295	0.072	1	1
nfu1	8.35e-05	0.370218	0.361	0.109	1	1
zbtb18	8.43e-05	0.42555	0.525	0.196	1	1
scg3	8.55e-05	0.394722	0.918	0.652	1	1
stat2	8.59e-05	0.348385	0.279	0.065	1	1
safb	8.89e-05	0.385571	0.426	0.152	1	1
p4htm	9.05e-05	0.320198	0.295	0.072	1	1
cfl2	9.58e-05	0.388398	0.262	0.058	1	1
plekho1b	9.64e-05	0.358001	0.607	0.254	1	1
iscub	9.72e-05	0.420745	0.934	0.623	1	1
rps6ka3a	9.81e-05	0.306869	0.279	0.065	1	1
epb41l5	9.83e-05	0.394872	0.361	0.109	1	1
hmgn31	9.98e-05	0.398762	0.607	0.275	1	1
si:ch211-198m17.1	0.000102283	0.456112	0.459	0.167	1	1
camkk1b	0.000102765	0.360065	0.623	0.275	1	1
rnf21	0.000105095	0.389855	0.328	0.094	1	1
htra1b	0.000108532	0.274983	0.426	0.138	1	1
hexb	0.000113604	0.345584	0.623	0.275	1	1
atp8a2	0.000116916	0.339746	0.344	0.101	1	1
bzw2	0.000123175	0.337737	0.361	0.109	1	1
arhgap20	0.000129355	0.261996	0.311	0.08	1	1
dennd6aa	0.00014219	0.300278	0.328	0.094	1	1
ap1b1	0.000142809	0.383547	0.475	0.181	1	1
nrd1a	0.000144244	0.291198	0.311	0.087	1	1
si:dkey-23o4.6	0.000146697	0.384194	0.377	0.116	1	1
chchd10	0.000147285	0.390712	0.885	0.63	1	1
tnrc6a	0.000150136	0.366642	0.738	0.355	1	1
zgc:66433	0.000150136	0.323331	0.754	0.348	1	1
si:ch211-253b8.5	0.000152037	0.3383	0.279	0.072	1	1
BX005309.1	0.000153349	0.289157	0.377	0.123	1	1
znf7061	0.00015933	0.305081	0.344	0.101	1	1
pla2g15	0.00015933	0.300937	0.344	0.101	1	1
zgc:101566	0.000161988	0.269454	0.295	0.08	1	1
tmem94	0.000163393	0.410134	0.279	0.072	1	1
sptbn5	0.000165068	0.380879	0.328	0.094	1	1
stag2b	0.000180115	0.359479	0.377	0.13	1	1
camsap1a	0.000181384	0.358654	0.377	0.123	1	1
sall1a	0.000191928	0.327452	0.279	0.072	1	1
ylpm1	0.00019348	0.318278	0.328	0.101	1	1
fkbp16	0.000216302	0.318923	0.557	0.239	1	1
wnk1b	0.000216552	0.340568	0.328	0.101	1	1
ppp3r1b	0.000224247	0.497091	0.721	0.413	1	1
alkal1	0.000227618	0.255643	0.262	0.065	1	1
EIF1B1	0.000229379	0.402463	0.41	0.159	1	1
arap31	0.000245007	0.287637	0.344	0.101	1	1
arrdc3a	0.000248633	0.336977	0.721	0.362	1	1
smad3a	0.000249856	0.400428	0.443	0.174	1	1
si:ch211-237l4.6	0.000252287	0.259737	0.918	0.587	1	1
FP017274.1	0.000252622	0.317627	0.541	0.232	1	1
irf2bp1	0.000253805	0.29837	0.262	0.065	1	1
nfs1	0.000288158	0.379901	0.443	0.167	1	1
si:ch211-13c6.2	0.000306701	0.335865	0.344	0.116	1	1
si:cabz01102082.1	0.000311769	0.329882	0.623	0.29	1	1
impdh1a	0.000334281	0.352979	0.689	0.333	1	1
gal3st4	0.000339953	0.326818	0.361	0.123	1	1
brdt	0.000342389	0.372506	0.328	0.109	1	1
msi2b1	0.000361297	0.383424	0.623	0.297	1	1
es11	0.000361933	0.450739	0.902	0.594	1	1
emc7	0.000362367	0.36921	0.295	0.087	1	1
gsk3ab	0.000362372	0.331837	0.295	0.087	1	1
mpc21	0.000366997	0.411871	0.492	0.217	1	1
cdhr1a	0.000383064	0.339201	0.639	0.297	1	1
zgc:154093	0.000390165	0.336292	0.492	0.196	1	1
glsb	0.000395149	0.254082	0.492	0.196	1	1
mapre3b	0.000398802	0.345529	0.738	0.362	1	1
scamp5b1	0.000398802	0.312253	0.77	0.348	1	1
add3a	0.000408046	0.265712	0.344	0.116	1	1
si:ch211-272n13.3	0.000414532	0.347425	0.262	0.072	1	1
rgs9a	0.000416236	0.356115	0.311	0.094	1	1
MARK4	0.000425308	0.423049	0.656	0.341	1	1
si:zfos-943e10.1	0.00045065	0.38733	0.328	0.109	1	1
rtn31	0.000457069	0.36733	0.705	0.362	1	1
mink1	0.000463672	0.361503	0.377	0.138	1	1
selenos	0.00048735	0.291514	0.344	0.116	1	1
arhgap12b	0.000492245	0.301019	0.443	0.174	1	1
tmx3a	0.000492899	0.27384	0.295	0.087	1	1
sdha	0.000505699	0.330173	0.623	0.297	1	1
dscamb	0.000556106	0.270585	0.328	0.109	1	1
puf60a	0.000574601	0.338095	0.295	0.094	1	1
mpp6a	0.000574601	0.283145	0.295	0.094	1	1
ankrd13c	0.000592721	0.304197	0.262	0.072	1	1
ch25hl3	0.000635395	0.290979	0.426	0.167	1	1
akap11	0.000636458	0.35261	0.344	0.123	1	1
gramd2aa	0.000653393	0.381111	0.426	0.174	1	1
nr1d2b	0.000668755	0.385606	0.705	0.37	1	1
dpm11	0.000682436	0.287156	0.361	0.13	1	1
smarca4a	0.000718142	0.347122	0.279	0.087	1	1
sf3b1	0.000718593	0.264003	0.705	0.333	1	1
sec63	0.000720098	0.287054	0.262	0.08	1	1
calm3a.1	0.000740872	0.3272	0.541	0.246	1	1
cops2	0.000753031	0.32618	0.279	0.087	1	1
ccdc47	0.000763358	0.380272	0.361	0.138	1	1
tmem198b	0.00076842	0.492293	0.426	0.188	1	1
arhgap12a	0.000783027	0.346216	0.295	0.094	1	1
ipo7	0.000807341	0.261297	0.295	0.094	1	1
gdpd5a	0.000823545	0.351684	0.311	0.101	1	1
mxra7	0.000833438	0.312468	0.262	0.08	1	1
ppp1caa	0.000840528	0.29446	0.541	0.246	1	1
slc25a18	0.000847004	0.370597	0.262	0.08	1	1
cited4a1	0.00087042	0.447396	0.459	0.217	1	1
sez6a	0.000874757	0.364301	0.525	0.254	1	1
psmc6	0.000891371	0.333392	0.344	0.13	1	1
ric8a	0.00094608	0.327782	0.623	0.304	1	1
pip4k2aa	0.000952667	0.388346	0.295	0.101	1	1
atf4a	0.000953511	0.410392	0.721	0.428	1	1
copz2	0.000963142	0.291497	0.262	0.08	1	1
ccdc57	0.000966617	0.330435	0.607	0.312	1	1
psme4b	0.00100452	0.472327	0.41	0.181	1	1
arl3l21	0.00100465	0.360278	0.82	0.478	1	1
capza1a	0.00101021	0.297367	0.311	0.109	1	1
ezrb	0.00101059	0.335372	0.377	0.145	1	1
coq8a	0.0010414	0.334906	0.295	0.101	1	1
ppip5k1a	0.00104415	0.292664	0.295	0.094	1	1
lancl1	0.00104869	0.313435	0.377	0.152	1	1
ctnnb2	0.0010866	0.433964	0.311	0.116	1	1
hsd17b12b	0.00108857	0.35961	0.295	0.101	1	1
cmpk	0.00110147	0.323071	0.311	0.109	1	1
eif4a1a	0.00111187	0.296995	0.475	0.203	1	1
CABZ01102170.1	0.00112112	0.393478	0.295	0.101	1	1
BX936337.1	0.00113063	0.31488	0.328	0.116	1	1
tent5ba	0.001147	0.269727	0.262	0.08	1	1
aup1	0.00116524	0.254754	0.262	0.08	1	1
susd6	0.0011819	0.302242	0.41	0.159	1	1
rgs20	0.00119131	0.359239	0.557	0.261	1	1
got2a	0.00120195	0.284129	0.541	0.254	1	1
si:dkey-17e16.15	0.00120382	0.25893	0.557	0.254	1	1
tmx2b	0.00126048	0.315674	0.295	0.101	1	1
zgc:162331	0.00137637	0.365518	0.443	0.203	1	1
top1l	0.00141299	0.265087	0.361	0.138	1	1
elmod11	0.00160297	0.367646	0.393	0.167	1	1
fbl	0.00160853	0.276054	0.279	0.094	1	1
isca21	0.00161926	0.263514	0.311	0.116	1	1
mtmr10	0.00165646	0.278921	0.279	0.094	1	1
matr3l1.1.1	0.00174836	0.366232	0.361	0.152	1	1
lpin2	0.00178248	0.30978	0.262	0.087	1	1
ptdss2	0.00181428	0.341722	0.377	0.152	1	1
fdx1	0.0018616	0.253333	0.279	0.094	1	1
rx1	0.00188377	0.273659	0.361	0.145	1	1
ckmt2a	0.00189243	0.297897	0.492	0.225	1	1
kcnv2a	0.00192229	0.266837	0.607	0.283	1	1
ppp1cab	0.00194149	0.303632	0.508	0.246	1	1
hipk2	0.0019727	0.272016	0.279	0.094	1	1
ncoa2	0.00201482	0.269072	0.311	0.116	1	1
eef1a1a	0.00215995	0.260246	0.934	0.725	1	1
cs	0.00230961	0.262436	0.475	0.217	1	1
mprip	0.00232561	0.278816	0.377	0.159	1	1
atp1b2b1	0.00237027	0.276562	1	0.725	1	1
srcap	0.00242129	0.275199	0.279	0.101	1	1
rhol	0.00243541	0.326459	0.557	0.261	1	1
slc4a4a	0.00250754	0.269699	0.279	0.101	1	1
si:dkey-156n14.5	0.00253074	0.281865	0.377	0.159	1	1
erfl3	0.00258526	0.318454	0.311	0.123	1	1
gid8a	0.00261472	0.277111	0.279	0.101	1	1
pa2g4b	0.00262248	0.261926	0.295	0.109	1	1
rasgef1ba	0.00269152	0.290027	0.475	0.217	1	1
clcn3	0.00270403	0.356728	0.41	0.188	1	1
canx	0.00274087	0.363457	0.59	0.333	1	1
mycbp2	0.00275987	0.29528	0.311	0.123	1	1
pgd	0.00277975	0.375928	0.377	0.167	1	1
ddx3b1	0.00284673	0.341392	0.41	0.196	1	1
lsm14ab	0.00286958	0.301195	0.377	0.159	1	1
lmbrd1	0.00323677	0.333392	0.705	0.406	1	1
tmem30ab	0.00347572	0.255328	0.574	0.29	1	1
sypb	0.00374711	0.288735	0.967	0.717	1	1
camk2g1	0.00377111	0.301328	0.59	0.333	1	1
syne2b	0.0040925	0.37079	0.41	0.203	1	1
xpo1b	0.00425739	0.327495	0.262	0.101	1	1
selenow2a	0.00437202	0.255668	0.295	0.116	1	1
atf6	0.00437391	0.29251	0.262	0.101	1	1
clasp2	0.00438008	0.352084	0.393	0.188	1	1
chrac1	0.00500102	0.286181	0.262	0.101	1	1
si:ch211-113e8.11	0.0052044	0.318949	0.262	0.101	1	1
ywhabl	0.00523459	0.275679	0.82	0.536	1	1
six6b	0.00528184	0.306284	0.393	0.181	1	1
ncl	0.0055709	0.275808	0.557	0.29	1	1
tmem184ba	0.0057519	0.298798	0.475	0.246	1	1
ap3m2	0.00642076	0.302512	0.262	0.101	1	1
si:dkey-28b4.8	0.00696447	0.269059	0.328	0.145	1	1
syap1	0.0071946	0.251628	0.295	0.123	1	1
oaz2a	0.00774775	0.26218	0.557	0.312	1	1
tmem50a	0.00861253	0.264347	0.426	0.21	1	1
fstl5	0.00865153	0.262248	0.951	0.623	1	1
mrps14	0.00875192	0.277235	0.311	0.145	1	1
frya	0.00891503	0.282208	0.557	0.319	1	1
sec14l8	0.00926629	0.276389	0.311	0.138	1	1
FQ323156.12	3.14e-24	2.2117	0.88	0.201	4.87e-20	2
si:dkey-16p21.82	1.95e-21	1.50816	0.98	0.517	3.03e-17	2
atp2b3b	4.5e-20	1.56955	0.52	0.007	6.98e-16	2
ppiab2	2.66e-19	1.99351	0.86	0.336	4.13e-15	2
stmn1b2	2.69e-18	2.36527	0.86	0.356	4.17e-14	2
si:ch73-119p20.1	4.9e-18	1.37667	0.5	0.013	7.6e-14	2
CR383676.11	7.2e-18	1.62271	1	1	1.12e-13	2
fam107b2	1.92e-17	2.23234	0.76	0.215	2.97e-13	2
rgs161	1.97e-17	2.02999	0.58	0.054	3.06e-13	2
ndrg3a1	9.1e-17	1.60478	0.54	0.047	1.41e-12	2
mdh1aa1	2.07e-16	1.68568	0.84	0.409	3.2e-12	2
calm2a2	3.81e-16	1.738	0.64	0.114	5.92e-12	2
marcksl1b2	1e-15	2.43409	0.58	0.081	1.55e-11	2
rtn1a2	1.97e-15	1.85678	0.64	0.128	3.05e-11	2
tmem59l1	2e-15	1.38543	0.52	0.047	3.11e-11	2
laptm4a2	5.47e-15	1.63407	0.66	0.141	8.49e-11	2
gdi1	7.21e-15	1.33418	0.46	0.027	1.12e-10	2
scg5.1	7.85e-15	1.23047	0.42	0.013	1.22e-10	2
hsp70.21	2.25e-14	2.27148	0.88	0.638	3.48e-10	2
hsp70l1	2.7e-14	2.0177	0.88	0.658	4.19e-10	2
sv2a1	3.83e-14	1.53974	0.5	0.054	5.95e-10	2
nat162	4.1e-14	1.63383	0.6	0.107	6.36e-10	2
prkab1a	4.58e-14	1.10394	0.42	0.02	7.1e-10	2
olfm1b	5.16e-14	1.48881	0.44	0.027	8e-10	2
si:dkey-205h13.12	5.72e-14	1.44669	0.86	0.503	8.88e-10	2
vamp11	1.87e-13	2.08361	0.56	0.101	2.9e-09	2
eno1a2	2.04e-13	1.3595	0.84	0.456	3.17e-09	2
fkbp1aa2	2.36e-13	1.48589	0.64	0.161	3.66e-09	2
pclob1	2.4e-13	1.46386	0.54	0.087	3.73e-09	2
mllt11	2.41e-13	1.66786	0.48	0.054	3.73e-09	2
snap25a2	3.06e-13	2.1929	0.66	0.201	4.75e-09	2
stmn4	4.05e-13	1.23057	0.38	0.013	6.29e-09	2
stx1b	7.57e-13	1.39777	0.46	0.047	1.17e-08	2
ubb1	8.47e-13	1.40408	0.84	0.497	1.31e-08	2
syngr3b	9.52e-13	1.26098	0.44	0.04	1.48e-08	2
rplp11	1.45e-12	1.03621	0.88	0.617	2.26e-08	2
slc25a3b1	1.48e-12	1.38262	0.6	0.141	2.3e-08	2
zgc:153426	1.59e-12	1.18732	0.4	0.027	2.46e-08	2
map4l2	1.7e-12	1.61087	0.64	0.188	2.64e-08	2
sult4a1	2.32e-12	1.04358	0.36	0.013	3.6e-08	2
nova21	2.33e-12	1.47601	0.48	0.067	3.61e-08	2
h2afx11	3e-12	1.15091	0.94	0.758	4.65e-08	2
rpl241	3.03e-12	0.827225	0.92	0.685	4.7e-08	2
mdkb1	4.87e-12	2.05379	0.48	0.074	7.55e-08	2
erh1	6.05e-12	1.14486	0.76	0.295	9.39e-08	2
camk2n1a2	7.81e-12	1.62941	0.58	0.134	1.21e-07	2
hmgn71	8.48e-12	1.20452	0.72	0.262	1.32e-07	2
slmapb1	8.96e-12	1.38132	0.44	0.054	1.39e-07	2
nsg21	1.11e-11	1.73961	0.52	0.101	1.72e-07	2
hsp70.11	1.14e-11	2.10181	0.76	0.497	1.78e-07	2
diras1a	1.38e-11	1.25882	0.46	0.06	2.13e-07	2
si:ch211-202a12.42	1.77e-11	1.67835	0.84	0.57	2.75e-07	2
rtn1b	1.97e-11	1.12841	0.4	0.034	3.06e-07	2
syt1a1	2.87e-11	1.73093	0.52	0.107	4.45e-07	2
zgc:658941	3.48e-11	1.31193	0.46	0.067	5.41e-07	2
fabp31	3.86e-11	1.25077	0.66	0.208	5.99e-07	2
tfap2a	4.5e-11	1.16394	0.36	0.027	6.98e-07	2
pax6b	6.68e-11	1.57508	0.42	0.054	1.04e-06	2
rgs8	7.27e-11	1.44551	0.4	0.047	1.13e-06	2
ppdpfb1	8.18e-11	1.57571	0.8	0.443	1.27e-06	2
myl6	8.49e-11	0.968242	0.34	0.02	1.32e-06	2
snap25b1	9.15e-11	1.42764	0.84	0.779	1.42e-06	2
eef1a1l2	9.37e-11	1.27935	0.4	0.047	1.45e-06	2
tmsb4x2	1.03e-10	1.42337	0.88	0.685	1.6e-06	2
tkta1	1.1e-10	1.36365	0.58	0.168	1.7e-06	2
scg5	1.13e-10	1.23695	0.4	0.047	1.76e-06	2
stxbp1a1	1.28e-10	1.29256	0.46	0.074	1.99e-06	2
fosab1	1.35e-10	1.64046	0.84	0.523	2.09e-06	2
st8sia5	1.42e-10	0.81777	0.26	0	2.2e-06	2
tpi1b1	1.91e-10	1.35017	0.7	0.322	2.97e-06	2
COX5B1	2.07e-10	1.30796	0.74	0.362	3.21e-06	2
gpm6ab	2.17e-10	1.39011	0.34	0.027	3.36e-06	2
syt11a	2.18e-10	1.2139	0.42	0.06	3.38e-06	2
nell2b	2.24e-10	1.28254	0.4	0.054	3.47e-06	2
hsp70.31	2.66e-10	1.60752	0.82	0.691	4.12e-06	2
uchl1	2.91e-10	1.36666	0.32	0.02	4.51e-06	2
ndufa4	3.24e-10	1.07176	0.32	0.02	5.03e-06	2
slc6a1b	3.65e-10	2.05086	0.42	0.067	5.67e-06	2
atp1b2a1	4.22e-10	1.11523	0.78	0.45	6.54e-06	2
gng3	4.22e-10	1.40788	0.42	0.067	6.55e-06	2
stmn4l	4.31e-10	0.964467	0.32	0.02	6.69e-06	2
hmgb1a1	4.32e-10	1.32164	0.56	0.148	6.7e-06	2
aldocb1	4.48e-10	0.719688	0.96	0.886	6.96e-06	2
gad1b1	6.92e-10	1.75027	0.56	0.154	1.07e-05	2
grin1b	7.39e-10	1.41687	0.4	0.06	1.15e-05	2
si:dkey-81l17.6	7.91e-10	1.04808	0.42	0.067	1.23e-05	2
tubb4b2	8.01e-10	1.15971	0.58	0.168	1.24e-05	2
atp1a3a1	8.66e-10	1.4363	0.48	0.101	1.34e-05	2
tspan7b	9.05e-10	1.21609	0.4	0.06	1.4e-05	2
atp5if1b1	9.79e-10	1.08845	0.8	0.423	1.52e-05	2
sncgb	1.27e-09	1.03009	0.36	0.04	1.97e-05	2
sypa1	1.32e-09	1.28231	0.44	0.081	2.04e-05	2
scg2b	1.39e-09	1.55377	0.32	0.027	2.16e-05	2
csdc2a	1.7e-09	1.02352	0.34	0.034	2.64e-05	2
pabpc1b	2e-09	1.02803	0.3	0.02	3.11e-05	2
aldoaa1	2.27e-09	1.32683	0.64	0.255	3.53e-05	2
nme2b.11	2.28e-09	1.29171	0.58	0.195	3.53e-05	2
stmn2a	2.39e-09	1.00151	0.3	0.02	3.7e-05	2
sybu1	2.75e-09	1.24032	0.52	0.134	4.27e-05	2
desi1a	2.94e-09	0.832516	0.3	0.02	4.57e-05	2
pcp4a1	3.54e-09	1.66527	0.54	0.168	5.49e-05	2
h1fx1	4.09e-09	1.61522	0.48	0.114	6.34e-05	2
itm2ca1	4.09e-09	1.21268	0.48	0.114	6.34e-05	2
si:dkey-56f14.71	4.45e-09	1.43945	0.54	0.174	6.91e-05	2
snap91	4.55e-09	0.870183	0.36	0.047	7.06e-05	2
oaz2b1	4.98e-09	1.73985	0.46	0.107	7.73e-05	2
tuba1c2	5.31e-09	1.66141	0.62	0.275	8.23e-05	2
ywhag2	5.44e-09	1.12174	0.4	0.067	8.45e-05	2
fth1a1	5.46e-09	0.811231	0.96	0.732	8.48e-05	2
elavl3	5.54e-09	1.20343	0.32	0.034	8.59e-05	2
SMIM36	5.64e-09	1.82023	0.36	0.054	8.76e-05	2
kcnip3a	6.7e-09	0.948157	0.32	0.034	0.000103991	2
pdcd4b	7.1e-09	1.11423	0.42	0.087	0.000110196	2
hsp90ab11	7.53e-09	0.937625	0.84	0.577	0.000116779	2
gad21	8.35e-09	2.09643	0.48	0.128	0.000129513	2
nrxn1a	8.84e-09	0.811975	0.28	0.02	0.000137237	2
gpm6aa	9.39e-09	1.35389	0.46	0.107	0.000145757	2
pax6a	1.06e-08	1.40058	0.36	0.054	0.000164897	2
cfl11	1.48e-08	1.13379	0.74	0.45	0.000230073	2
ndrg2	1.88e-08	1.04757	0.32	0.04	0.00029232	2
rpl71	2.1e-08	0.694165	0.9	0.617	0.000325622	2
gatsl2	2.25e-08	0.978394	0.34	0.047	0.00034878	2
2019-09-06	2.34e-08	1.01324	0.36	0.054	0.000363202	2
cox4i11	2.46e-08	0.947585	0.72	0.369	0.000381652	2
cox6c1	3.23e-08	0.92598	0.78	0.477	0.000500505	2
clu1	3.61e-08	1.3054	0.46	0.121	0.000559461	2
slc32a1	3.79e-08	1.27847	0.34	0.054	0.000587559	2
rpl351	4.61e-08	0.680201	0.86	0.658	0.000715182	2
stxbp5a	4.85e-08	0.986417	0.36	0.06	0.00075316	2
zgc:91860	5.2e-08	0.882553	0.28	0.027	0.000807282	2
apoob	5.22e-08	0.982736	0.26	0.02	0.000809301	2
prkag2a	5.4e-08	0.80296	0.26	0.02	0.000837113	2
necab1	5.55e-08	1.30671	0.28	0.027	0.00086065	2
egr41	5.64e-08	1.85889	0.5	0.174	0.000874534	2
gng13b	6.38e-08	1.44009	0.26	0.02	0.000990656	2
pcsk1nl	7.06e-08	0.673312	0.26	0.02	0.00109553	2
smdt1b	7.45e-08	0.987088	0.44	0.101	0.00115544	2
dusp2	8.07e-08	0.907132	0.26	0.02	0.00125221	2
ndufb91	8.54e-08	1.03439	0.6	0.242	0.00132508	2
ctbp2a	8.57e-08	1.12404	0.32	0.047	0.00133019	2
pim1	9.03e-08	1.36699	0.58	0.248	0.00140162	2
ldha1	9.16e-08	1.10594	0.52	0.174	0.00142182	2
cox6a11	9.32e-08	0.768804	0.82	0.57	0.00144554	2
eef1a1l11	9.86e-08	0.849249	0.74	0.423	0.00152991	2
atp2b1a	1.31e-07	1.06541	0.4	0.094	0.00202855	2
elavl4	1.77e-07	0.967071	0.26	0.027	0.00275037	2
cirbpb1	1.93e-07	0.655307	0.88	0.584	0.00299347	2
six3b	1.99e-07	1.76127	0.36	0.074	0.00308674	2
junbb	2.04e-07	0.853619	0.28	0.034	0.00316137	2
tubb2b	2.26e-07	0.881172	0.4	0.087	0.00350797	2
arl4ab	2.43e-07	1.38085	0.34	0.06	0.00376799	2
maptb	2.44e-07	0.718604	0.28	0.034	0.00378107	2
eif1b1	2.54e-07	0.820121	0.78	0.604	0.00393636	2
gnao1b	2.68e-07	1.01714	0.36	0.074	0.00415458	2
cplx2l	2.81e-07	1.79649	0.36	0.081	0.0043654	2
h3f3d1	3.06e-07	0.893333	0.72	0.47	0.0047488	2
gabarapl21	3.45e-07	0.994991	0.66	0.342	0.00535102	2
idh2	3.53e-07	0.940512	0.64	0.289	0.00547221	2
rab41	3.67e-07	0.91641	0.3	0.047	0.00569266	2
tnrc6c11	3.74e-07	0.868151	0.78	0.517	0.00580201	2
glrbb	3.87e-07	0.730424	0.26	0.027	0.00600038	2
tmsb21	4.15e-07	1.13449	0.54	0.215	0.0064465	2
lin7a	4.23e-07	1.11868	0.34	0.067	0.00655739	2
vsx1	4.67e-07	1.46758	0.28	0.04	0.00724575	2
sncb	4.8e-07	1.02806	0.28	0.04	0.00745451	2
calm3a1	5.25e-07	1.30039	0.66	0.43	0.00814748	2
atp5f1b1	6.41e-07	0.684868	0.86	0.631	0.00995161	2
grin1a	6.9e-07	1.23909	0.36	0.087	0.0107033	2
irf2bpl	8.43e-07	0.759995	0.28	0.04	0.0130773	2
ywhaqa1	9.53e-07	0.983962	0.7	0.47	0.0147822	2
ndrg41	1.09e-06	1.31342	0.44	0.134	0.0168806	2
calm3b1	1.16e-06	0.83198	0.74	0.483	0.0180524	2
fosl2	1.23e-06	0.886984	0.26	0.034	0.0190558	2
nrn1lb	1.43e-06	1.32546	0.3	0.054	0.0222245	2
kif5aa	1.46e-06	0.662134	0.26	0.034	0.0226322	2
rpl17	1.55e-06	0.598455	0.78	0.53	0.0240367	2
ube2v21	1.59e-06	0.903367	0.56	0.235	0.0246558	2
ywhah1	1.62e-06	1.10639	0.52	0.221	0.0250726	2
cbx1b	1.63e-06	0.855401	0.3	0.054	0.0252546	2
lrit1a	1.65e-06	1.16303	0.28	0.047	0.0255726	2
plekhb2	1.88e-06	1.0114	0.32	0.067	0.0291885	2
rpl34	1.91e-06	0.522266	0.84	0.611	0.0295772	2
cabp5a	1.95e-06	1.40824	0.34	0.081	0.0302349	2
cox7b1	1.98e-06	0.665126	0.86	0.725	0.0306772	2
gpr137bb	2.05e-06	0.572936	0.26	0.034	0.0318167	2
gabarapb1	2.13e-06	0.751424	0.74	0.57	0.032994	2
ndufa8	2.47e-06	0.769509	0.5	0.181	0.038286	2
sept151	2.51e-06	1.37146	0.46	0.148	0.0389613	2
atp6v0b1	2.63e-06	0.78388	0.38	0.101	0.0407886	2
sv2bb	2.72e-06	0.89101	0.28	0.047	0.0421294	2
fundc11	2.74e-06	0.932469	0.46	0.154	0.0424934	2
pin1	3.11e-06	0.883968	0.3	0.06	0.048222	2
chn1	3.27e-06	0.859499	0.26	0.04	0.0507106	2
pabpn1	3.28e-06	0.67296	0.4	0.114	0.0509095	2
anp32a1	3.31e-06	0.95219	0.6	0.289	0.0514113	2
dynll11	3.38e-06	0.918544	0.74	0.537	0.0523786	2
vsnl1a	3.54e-06	0.926729	0.26	0.04	0.0549825	2
bcl2l13	3.59e-06	0.919733	0.34	0.081	0.0557001	2
ube2ql1	3.59e-06	0.740367	0.26	0.04	0.0557254	2
ube2e31	3.66e-06	0.892975	0.42	0.134	0.0567986	2
rab2a1	4.48e-06	0.81003	0.56	0.255	0.0694811	2
si:ch211-235e9.81	5.09e-06	1.07479	0.48	0.201	0.0789735	2
ndufc21	5.62e-06	1.01158	0.46	0.168	0.0872674	2
zgc:171772	5.74e-06	0.385561	0.96	0.879	0.0890197	2
calm1b1	5.9e-06	0.985552	0.46	0.174	0.0914885	2
cabp2a	5.92e-06	1.66874	0.36	0.107	0.0919123	2
spcs1	6.05e-06	0.821411	0.34	0.087	0.0938663	2
gnai2b	7.06e-06	0.571396	0.26	0.04	0.109589	2
dctn3	7.32e-06	0.67537	0.36	0.094	0.113637	2
gadd45ba1	7.55e-06	1.02184	0.74	0.53	0.117085	2
ubl3a1	7.58e-06	1.1149	0.44	0.168	0.117686	2
gmfb	7.63e-06	0.930588	0.36	0.094	0.118461	2
clstn1	7.73e-06	0.690752	0.8	0.651	0.119921	2
cdc421	8.3e-06	0.91807	0.56	0.289	0.128825	2
camk2b1	8.37e-06	0.78615	0.3	0.067	0.129796	2
pebp1	8.41e-06	0.711915	0.28	0.054	0.130414	2
hist2h2l1	9.02e-06	0.970537	0.56	0.268	0.140005	2
pde4ba	9.26e-06	0.71618	0.28	0.054	0.143695	2
cab39l	9.6e-06	0.69831	0.3	0.067	0.148918	2
ap2b1	1.04e-05	0.655629	0.26	0.047	0.161536	2
tspan3b	1.07e-05	0.651192	0.28	0.054	0.166065	2
ccni1	1.13e-05	1.14417	0.48	0.201	0.175298	2
fam32a1	1.14e-05	0.758513	0.58	0.302	0.177484	2
lhfpl3	1.16e-05	0.975344	0.3	0.067	0.180665	2
rpl14	1.24e-05	0.666626	0.7	0.43	0.192417	2
zgc:564931	1.49e-05	0.927152	0.5	0.228	0.23074	2
vapal	1.49e-05	0.750441	0.32	0.081	0.231078	2
sub1a	1.55e-05	0.816	0.48	0.188	0.240517	2
bhlhe411	1.55e-05	0.939135	0.62	0.362	0.241148	2
dedd11	1.78e-05	0.781421	0.62	0.349	0.276152	2
cops9	1.88e-05	0.772592	0.5	0.215	0.291781	2
higd1a1	1.95e-05	0.807416	0.66	0.45	0.303165	2
elocb1	2.12e-05	0.845372	0.56	0.275	0.328348	2
cst31	2.18e-05	0.805309	0.7	0.443	0.33765	2
oaz1b1	2.27e-05	0.588788	0.86	0.826	0.351914	2
polr2f	2.46e-05	0.696367	0.3	0.074	0.382068	2
ndufb71	2.49e-05	0.780097	0.64	0.376	0.38619	2
rpl9	2.75e-05	0.680023	0.68	0.389	0.426094	2
atp6v1g11	3.72e-05	0.763605	0.76	0.597	0.576722	2
gstm.1	3.86e-05	0.777245	0.26	0.06	0.598814	2
pfkpa	4.3e-05	1.12923	0.36	0.121	0.666704	2
rps9	4.44e-05	0.524008	0.76	0.564	0.689359	2
sem1	4.58e-05	0.902646	0.56	0.289	0.710084	2
tmem35	4.6e-05	0.876573	0.44	0.174	0.714327	2
meaf6	5.92e-05	0.694906	0.34	0.101	0.918828	2
brk11	6.33e-05	0.804663	0.5	0.255	0.982698	2
map1lc3b1	6.53e-05	0.886463	0.52	0.282	1	2
gabarapa1	6.87e-05	0.885756	0.54	0.289	1	2
ndufs5	6.96e-05	0.618959	0.56	0.268	1	2
rpl10a	7.64e-05	0.516227	0.72	0.55	1	2
atp5meb1	8.01e-05	0.647036	0.72	0.664	1	2
appb1	8.35e-05	0.842102	0.4	0.154	1	2
ndufa51	8.49e-05	0.740154	0.64	0.45	1	2
tomm20b1	8.82e-05	0.778608	0.5	0.242	1	2
ndufa121	8.92e-05	0.817967	0.42	0.174	1	2
grb2b	8.94e-05	0.692917	0.26	0.06	1	2
eif3f1	9.14e-05	0.8509	0.42	0.181	1	2
neurod4	9.57e-05	0.814377	0.28	0.074	1	2
rpl32	0.000102261	0.38501	0.94	0.846	1	2
actb2	0.000102468	0.583965	0.78	0.664	1	2
sncga	0.00010665	1.22326	0.3	0.087	1	2
zranb2	0.000109153	0.782576	0.32	0.101	1	2
setb1	0.000120324	0.672509	0.56	0.302	1	2
ppiaa	0.00012065	0.612921	0.66	0.383	1	2
mcl1a	0.000124251	1.05829	0.58	0.342	1	2
eif5a1	0.000125254	0.740085	0.56	0.302	1	2
rpl19	0.000129317	0.452861	0.86	0.691	1	2
rps7	0.000134577	0.403499	0.8	0.604	1	2
atp5mc11	0.000137614	0.508266	0.74	0.497	1	2
mpc1	0.000141221	0.794572	0.3	0.094	1	2
bnip3lb	0.000146019	0.56159	0.26	0.06	1	2
npas4a	0.000169169	1.14044	0.34	0.128	1	2
prelid3b	0.000174991	0.767546	0.52	0.268	1	2
capza1b	0.000178987	0.616419	0.26	0.067	1	2
calm1a1	0.000182885	0.729499	0.8	0.678	1	2
hmgb1b	0.000190989	0.74636	0.42	0.188	1	2
tuba1a	0.000194143	0.835033	0.26	0.067	1	2
map1lc3a1	0.000208048	0.604461	0.64	0.383	1	2
gpia1	0.00021492	0.708989	0.5	0.255	1	2
cadpsb	0.000219155	0.657764	0.26	0.067	1	2
zc4h2	0.000223606	0.583015	0.26	0.067	1	2
mknk2b	0.000231288	0.688746	0.38	0.148	1	2
rpl391	0.000249021	0.360909	0.92	0.919	1	2
rpl10	0.000250813	0.585079	0.82	0.691	1	2
cicb1	0.000251653	0.78368	0.32	0.114	1	2
rs1a	0.000260897	2.22553	0.4	0.188	1	2
uqcc3	0.000262613	0.700419	0.28	0.087	1	2
pfn2l1	0.00026517	0.633016	0.52	0.282	1	2
rhoaa	0.000276369	0.695881	0.32	0.107	1	2
ckbb1	0.000279124	0.37969	0.98	0.987	1	2
sec61b	0.000282802	0.684914	0.28	0.087	1	2
ier2b	0.000287227	0.872054	0.3	0.101	1	2
calr	0.000293433	0.675011	0.28	0.087	1	2
vamp21	0.0003215	0.723175	0.46	0.215	1	2
reep51	0.000325417	0.773679	0.48	0.235	1	2
efhd1	0.000330855	0.759671	0.26	0.074	1	2
nrgna1	0.000344298	2.24867	0.38	0.195	1	2
tbcb	0.000351067	0.578246	0.32	0.107	1	2
rps15	0.000373394	0.472227	0.78	0.691	1	2
tob1b1	0.000388266	0.851073	0.7	0.53	1	2
nucks1a	0.000401288	0.584549	0.42	0.188	1	2
atp6v0cb	0.000402587	0.537646	0.86	0.691	1	2
ppp1r3cb	0.000407191	0.751609	0.3	0.101	1	2
actb1	0.000429227	0.703306	0.48	0.255	1	2
ier3ip1	0.000447699	0.827489	0.42	0.201	1	2
amer21	0.000451967	1.01329	0.32	0.121	1	2
dnaja2l	0.000499857	0.553966	0.36	0.141	1	2
eif1axb1	0.000507179	0.609645	0.62	0.403	1	2
hmgn6	0.000517888	0.409484	0.78	0.698	1	2
sumo2b	0.000518686	0.637177	0.52	0.282	1	2
rnasekb1	0.000530167	0.468153	0.72	0.544	1	2
cd81a	0.000535478	0.646545	0.3	0.107	1	2
oaz1a	0.000589173	0.319674	0.98	0.886	1	2
eif3g1	0.000647024	0.668932	0.36	0.154	1	2
hsbp1b1	0.000691666	0.519507	0.42	0.188	1	2
btg11	0.000692083	0.638878	0.8	0.664	1	2
rpl18	0.000697799	0.427295	0.78	0.658	1	2
ubc	0.000722803	0.85843	0.48	0.289	1	2
usp36	0.000734909	0.580479	0.26	0.081	1	2
si:dkey-159f12.21	0.00075239	0.622317	0.5	0.275	1	2
rps26l	0.000792735	0.397109	0.78	0.617	1	2
ndufb6	0.000815508	0.779021	0.36	0.161	1	2
h2afy2	0.000817519	0.500696	0.38	0.161	1	2
hnrnpa0b	0.000822997	0.554762	0.56	0.329	1	2
camta1b	0.000838325	0.569829	0.28	0.094	1	2
rpl22	0.000840073	0.428257	0.8	0.624	1	2
si:ch211-195b13.1	0.000857745	0.841129	0.66	0.483	1	2
rps141	0.000866466	0.480246	0.78	0.638	1	2
vdac31	0.000885372	0.615585	0.54	0.322	1	2
atp5pb1	0.000943076	0.541845	0.64	0.436	1	2
btg2	0.000958876	0.63026	0.36	0.148	1	2
zgc:1141881	0.000961552	0.436893	0.76	0.671	1	2
hmgb3a	0.000975239	0.598267	0.28	0.094	1	2
pvalb9	0.000975405	1.23946	0.26	0.087	1	2
vps28	0.00100131	0.547267	0.36	0.148	1	2
apc	0.00102867	0.466387	0.26	0.081	1	2
madd1	0.00105308	0.773224	0.46	0.262	1	2
psma3	0.00120884	0.734764	0.32	0.134	1	2
ndufb81	0.00126714	0.514406	0.56	0.356	1	2
zgc:1231051	0.00130189	0.574522	0.44	0.242	1	2
snrpd1	0.00142865	0.458231	0.36	0.148	1	2
efna1b	0.00144032	1.11544	0.42	0.208	1	2
si:dkey-164f24.2	0.00149095	0.616051	0.3	0.121	1	2
cux1a1	0.00151399	0.711639	0.32	0.141	1	2
hnrnpaba	0.00157219	0.56654	0.66	0.436	1	2
rps27.2	0.00158174	0.436476	0.7	0.497	1	2
hspa8	0.00162711	0.473402	0.76	0.691	1	2
faua	0.00162729	0.419732	0.78	0.745	1	2
vps35	0.00170327	0.47748	0.26	0.087	1	2
ywhae1	0.00174384	0.575658	0.44	0.242	1	2
rpl13a	0.00180294	0.429743	0.68	0.564	1	2
rps18	0.00184667	0.339289	0.86	0.711	1	2
aplp11	0.00198011	0.9712	0.42	0.228	1	2
myl12.11	0.00199097	0.595193	0.52	0.329	1	2
necap11	0.0020477	0.549768	0.4	0.195	1	2
rnf71	0.0020651	0.496688	0.36	0.168	1	2
sh3bgrl3	0.00207352	0.644568	0.28	0.107	1	2
rpl28	0.00208901	0.396733	0.76	0.624	1	2
eif4ebp2	0.00213788	0.577283	0.28	0.107	1	2
si:ch211-196l7.4	0.00217536	0.472663	0.86	0.765	1	2
sec62	0.00220408	0.619159	0.28	0.107	1	2
rpl35a	0.00220534	0.462975	0.82	0.664	1	2
rpl29	0.00228867	0.301906	0.96	0.866	1	2
pcf111	0.00232017	0.535219	0.46	0.235	1	2
foxg1b	0.00235862	0.805921	0.5	0.295	1	2
glula	0.00240062	0.83699	0.68	0.523	1	2
cnbpb1	0.00240071	0.53971	0.44	0.235	1	2
rps24	0.00240219	0.405592	0.7	0.55	1	2
rpl36a	0.00263458	0.290303	0.9	0.738	1	2
rpl21	0.00264881	0.374179	0.7	0.57	1	2
dnajb1b1	0.002675	1.18717	0.42	0.275	1	2
arl8a	0.00283997	0.415018	0.26	0.094	1	2
ube2v11	0.00287401	0.690324	0.4	0.228	1	2
rps2	0.00291197	0.355741	0.78	0.671	1	2
mcl1b	0.00296205	1.28332	0.34	0.181	1	2
atp6v1e1b	0.00309408	0.655848	0.5	0.309	1	2
cox7c	0.00327174	0.305901	0.92	0.913	1	2
tomm71	0.00334663	0.70909	0.3	0.134	1	2
dynlrb1	0.00335943	0.704791	0.38	0.195	1	2
rpl11	0.00354114	0.330912	0.78	0.658	1	2
gpatch81	0.0035925	0.735705	0.34	0.168	1	2
ppp6c	0.00362379	0.416022	0.3	0.121	1	2
coa3a	0.00364883	0.538859	0.28	0.114	1	2
rplp21	0.00367956	0.372635	0.82	0.758	1	2
rplp0	0.00370215	0.361729	0.88	0.725	1	2
arpc2	0.00375511	0.592733	0.28	0.114	1	2
si:dkeyp-75h12.5	0.00392039	0.637127	0.26	0.101	1	2
sdhc	0.00412662	0.421775	0.52	0.309	1	2
rack1	0.00446453	0.36958	0.64	0.477	1	2
pik3r3b	0.00454348	0.519513	0.3	0.134	1	2
ndufs4	0.00471587	0.616092	0.38	0.208	1	2
rpl36	0.00476528	0.313187	0.88	0.826	1	2
mif	0.00487239	0.523181	0.36	0.174	1	2
elmo1	0.00488643	0.554462	0.34	0.168	1	2
arglu1a1	0.00511425	0.657913	0.38	0.208	1	2
zfhx4	0.00517197	0.698055	0.4	0.235	1	2
znf395b	0.00525768	0.61686	0.32	0.154	1	2
tmem258	0.0053411	0.451988	0.44	0.248	1	2
ndufs61	0.00551908	0.709221	0.4	0.242	1	2
uqcrq1	0.00579275	0.435806	0.72	0.604	1	2
rsrp11	0.0058346	0.535247	0.66	0.53	1	2
rps25	0.00586471	0.255941	0.82	0.685	1	2
si:ch1073-314i13.41	0.00603235	0.488872	0.3	0.128	1	2
zgc:77650	0.00614146	0.481949	0.28	0.121	1	2
acbd71	0.00632095	0.590877	0.32	0.161	1	2
rpl4	0.0063443	0.369657	0.64	0.423	1	2
lrpap1	0.00636299	0.601768	0.26	0.114	1	2
rps4x	0.00668309	0.38959	0.7	0.577	1	2
rheb1	0.00691172	0.496307	0.28	0.128	1	2
eif3ja1	0.00700043	0.523083	0.46	0.262	1	2
rps16	0.00710798	0.346228	0.78	0.725	1	2
hpca1	0.00714439	0.716155	0.46	0.309	1	2
sh3bgrl21	0.00777413	0.582409	0.32	0.161	1	2
ier5	0.007796	0.488907	0.36	0.188	1	2
ndufa11	0.0079621	0.472138	0.46	0.275	1	2
rpl27	0.00813555	0.414437	0.68	0.638	1	2
ndufa71	0.00829665	0.6342	0.48	0.329	1	2
atp5po1	0.00864988	0.395979	0.62	0.456	1	2
rps23	0.00871704	0.28854	0.84	0.785	1	2
zgc:92606	0.00883219	0.449552	0.4	0.228	1	2
rorab	0.00929076	0.462059	0.42	0.255	1	2
ndufb101	0.00949465	0.592591	0.36	0.195	1	2
rps5	0.00980644	0.30852	0.76	0.631	1	2
kif1b1	0.00994137	0.538724	0.32	0.154	1	2
khdrbs1a	0.00998857	0.361467	0.72	0.638	1	2

## Sheet: LWS1 enriched
	p_val	avg_logFC	pct.1	pct.2	p_val_adj	cluster
opn1lw11	6.18738e-186	2.7064	1	0	9.60033e-182	Pos
arr3a1	1.59071e-85	2.67603	0.851	0.284	2.46815e-81	Pos
rcvrn31	1.22754e-70	2.39163	0.83	0.129	1.90465e-66	Pos
grk7a1	3.02242e-61	1.95331	0.809	0.096	4.68959e-57	Pos
guca1c1	2.83003e-59	2.10471	0.84	0.183	4.39108e-55	Pos
gngt2a1	1.27622e-58	2.33025	0.777	0.226	1.98019e-54	Pos
pdcb1	2.50978e-58	2.06492	0.787	0.149	3.89417e-54	Pos
slc1a2a1	3.21162e-55	1.90775	0.766	0.094	4.98315e-51	Pos
gnb3b1	4.50921e-55	1.87412	0.819	0.193	6.99649e-51	Pos
gnat21	3.59809e-53	1.76212	0.787	0.13	5.58279e-49	Pos
pde6c1	6.11474e-52	1.72558	0.787	0.129	9.48763e-48	Pos
camk1gb1	8.21582e-51	1.85333	0.84	0.242	1.27477e-46	Pos
slc24a21	1.029e-48	1.85191	0.723	0.088	1.5966e-44	Pos
ppm1na1	1.38879e-48	1.7074	0.723	0.083	2.15485e-44	Pos
atp1b2b1	2.82031e-47	1.55746	0.83	0.288	4.376e-43	Pos
prph2a1	7.31123e-46	1.56584	0.691	0.074	1.13441e-41	Pos
nin1	6.30427e-44	1.72497	0.638	0.064	9.78171e-40	Pos
mt-co31	6.06213e-43	1.38844	1	0.976	9.406e-39	Pos
six71	2.26174e-42	1.64927	0.585	0.049	3.50932e-38	Pos
cdk5r2b1	2.73155e-41	1.49033	0.66	0.08	4.23828e-37	Pos
clul11	1.3693e-40	1.48856	0.649	0.077	2.1246e-36	Pos
rcvrn21	8.08667e-40	1.71725	0.734	0.151	1.25473e-35	Pos
si:dkey-190l8.21	2.96361e-38	1.48166	0.606	0.069	4.59834e-34	Pos
si:dkey-97a13.121	4.43271e-38	1.62229	0.638	0.083	6.87779e-34	Pos
dclk2a1	1.71181e-37	1.34673	0.681	0.136	2.65605e-33	Pos
prph2b1	2.84818e-36	1.43037	0.745	0.163	4.41924e-32	Pos
gngt2b1	5.43351e-36	1.30793	0.894	0.444	8.43064e-32	Pos
hexb1	1.24582e-35	1.38651	0.553	0.06	1.93301e-31	Pos
cngb3.11	1.75114e-35	1.21458	0.468	0.031	2.71708e-31	Pos
si:ch1073-303d10.11	2.3564e-34	1.58379	0.585	0.084	3.65619e-30	Pos
PLEKHB11	3.43327e-34	1.47929	0.564	0.068	5.32706e-30	Pos
paplna1	4.96272e-34	1.35635	0.574	0.068	7.70016e-30	Pos
mt-nd31	5.45049e-34	1.18222	0.947	0.859	8.45699e-30	Pos
saga1	5.81426e-34	1.69262	0.745	0.233	9.02141e-30	Pos
es11	6.84904e-34	1.65366	0.755	0.266	1.0627e-29	Pos
pde6ha1	7.96953e-33	1.07518	0.989	0.967	1.23655e-28	Pos
slc38a5a1	1.3203e-32	1.32365	0.574	0.078	2.04858e-28	Pos
si:cabz01076231.11	2.33793e-31	1.29286	0.543	0.066	3.62753e-27	Pos
crx1	4.12158e-31	1.20085	0.819	0.341	6.39504e-27	Pos
gnb5b1	2.82785e-30	1.34397	0.755	0.277	4.3877e-26	Pos
usp211	2.8979e-30	1.22779	0.585	0.089	4.49638e-26	Pos
slc25a3a1	6.60242e-30	1.21678	0.606	0.099	1.02443e-25	Pos
zgc:1952451	1.03954e-29	1.48891	0.532	0.072	1.61294e-25	Pos
scamp5b1	1.18686e-29	1.23753	0.564	0.081	1.84153e-25	Pos
rbp4l1	1.9133e-29	0.888055	0.979	0.886	2.96867e-25	Pos
atp2b1b1	1.03356e-28	1.25872	0.681	0.154	1.60366e-24	Pos
opn6a1	1.67637e-28	1.21963	0.457	0.045	2.60106e-24	Pos
CT573282.11	2.63015e-28	0.977775	0.33	0.014	4.08093e-24	Pos
thrb1	2.78354e-28	1.30414	0.457	0.052	4.31893e-24	Pos
osbpl71	4.34065e-28	1.19966	0.617	0.127	6.73495e-24	Pos
guk1b1	9.57047e-28	1.27794	0.606	0.115	1.48495e-23	Pos
laptm4b1	1.23173e-27	0.910517	0.894	0.651	1.91115e-23	Pos
slkb1	2.70609e-27	1.23658	0.702	0.193	4.19876e-23	Pos
kcnb21	9.23861e-27	1.25601	0.67	0.162	1.43346e-22	Pos
zgc:664331	2.55831e-26	1.18663	0.5	0.075	3.96947e-22	Pos
rho1	2.91077e-26	1.06001	0.989	0.907	4.51635e-22	Pos
mt-co11	4.39462e-26	0.988574	1	0.984	6.81869e-22	Pos
inaa1	4.69941e-26	1.30295	0.532	0.085	7.2916e-22	Pos
ndrg1b1	5.2829e-26	1.42824	0.447	0.06	8.19695e-22	Pos
si:ch211-81a5.81	1.78562e-25	1.1575	0.415	0.043	2.77057e-21	Pos
ncaldb1	6.7047e-25	1.25151	0.649	0.161	1.0403e-20	Pos
kcnv2b1	1.39179e-24	0.97473	0.351	0.026	2.15951e-20	Pos
camkk1b1	6.63551e-24	1.08099	0.511	0.085	1.02957e-19	Pos
pde6gb1	7.81399e-24	0.849476	0.894	0.741	1.21242e-19	Pos
grk1a1	1.07084e-23	1.30871	0.606	0.154	1.66152e-19	Pos
mt-nd4l1	1.10886e-23	1.04793	0.66	0.168	1.72051e-19	Pos
rom1a1	2.181e-23	1.33507	0.617	0.165	3.38404e-19	Pos
ckmt2a1	1.36036e-22	1.27812	0.479	0.077	2.11073e-18	Pos
rbp31	2.36402e-22	1.09692	0.777	0.314	3.66802e-18	Pos
mt-atp61	4.31667e-22	0.910497	1	0.998	6.69775e-18	Pos
sypb1	9.38009e-22	0.977825	0.83	0.432	1.45541e-17	Pos
ablim31	4.52491e-21	0.924434	0.426	0.063	7.02085e-17	Pos
mt-nd51	7.38706e-21	0.959173	0.872	0.509	1.14618e-16	Pos
fstl51	9.02867e-21	0.966771	0.745	0.364	1.40089e-16	Pos
sez6a1	1.24319e-20	1.08018	0.489	0.094	1.92893e-16	Pos
si:dkey-61n16.51	1.88217e-20	1.21158	0.628	0.185	2.92037e-16	Pos
rgs9b1	2.87625e-20	1.04245	0.543	0.135	4.46279e-16	Pos
pdca1	3.0466e-20	1.01034	0.745	0.376	4.7271e-16	Pos
si:busm1-57f23.11	6.87443e-20	1.09248	0.298	0.023	1.06664e-15	Pos
scg31	1.92562e-19	0.940511	0.798	0.381	2.98779e-15	Pos
sagb1	2.23917e-19	1.01524	0.809	0.456	3.47429e-15	Pos
nme2a1	2.27029e-19	0.786363	0.628	0.185	3.52258e-15	Pos
gnat11	6.59657e-19	0.90346	0.862	0.511	1.02352e-14	Pos
unc119b1	7.24646e-19	1.07706	0.66	0.241	1.12436e-14	Pos
pde6a1	8.87062e-19	1.16805	0.638	0.267	1.37636e-14	Pos
samsn1b1	4.95103e-18	0.818364	0.309	0.032	7.68201e-14	Pos
opn1lw21	7.67438e-18	1.33168	0.362	0.05	1.19076e-13	Pos
si:ch73-141c7.11	1.10291e-17	0.969602	0.34	0.042	1.71128e-13	Pos
elovl4b1	1.20753e-17	0.875583	0.734	0.295	1.8736e-13	Pos
slc25a25a1	1.71879e-17	1.15483	0.457	0.109	2.66687e-13	Pos
hif1ab1	1.75452e-17	0.863619	0.819	0.424	2.72232e-13	Pos
mt-nd41	2.38657e-17	0.731245	0.957	0.905	3.70299e-13	Pos
mdh1ab1	3.22004e-17	1.06093	0.564	0.172	4.99622e-13	Pos
si:ch73-28h20.11	3.87283e-17	0.552443	0.351	0.066	6.00909e-13	Pos
opn4.11	5.22693e-17	0.93081	0.383	0.061	8.11011e-13	Pos
arl3l11	5.97401e-17	0.890407	0.532	0.144	9.26927e-13	Pos
slc7a3a1	6.41062e-17	1.05354	0.436	0.096	9.94671e-13	Pos
si:ch1073-111c8.31	6.60733e-17	0.684657	0.84	0.479	1.02519e-12	Pos
si:ch211-285j22.31	6.85252e-17	0.79312	0.606	0.205	1.06324e-12	Pos
frya1	6.9789e-17	0.947673	0.468	0.11	1.08285e-12	Pos
prom1b1	1.26542e-16	0.859223	0.543	0.157	1.96342e-12	Pos
cdhr1a1	1.79401e-16	0.896621	0.426	0.086	2.78358e-12	Pos
nt5c3a1	1.99235e-16	0.873803	0.383	0.066	3.09132e-12	Pos
arl3l21	2.50536e-16	0.778042	0.606	0.198	3.88732e-12	Pos
stxbp1b1	2.68656e-16	0.86987	0.628	0.237	4.16847e-12	Pos
si:ch211-198m17.11	5.06596e-16	0.575527	0.34	0.063	7.86035e-12	Pos
mt-nd11	1.62421e-15	0.746975	0.989	0.952	2.52013e-11	Pos
pdha1b1	1.6723e-15	0.770719	0.351	0.058	2.59474e-11	Pos
slc12a7b1	1.80907e-15	0.931743	0.564	0.175	2.80695e-11	Pos
si:ch211-237l4.61	4.18146e-15	0.806184	0.723	0.318	6.48796e-11	Pos
slc25a241	5.57643e-15	0.88685	0.309	0.042	8.65239e-11	Pos
tmem237a1	8.16422e-15	0.830326	0.394	0.079	1.26676e-10	Pos
arr3b1	1.13112e-14	1.198	0.596	0.231	1.75505e-10	Pos
si:dkey-126g1.91	1.48359e-14	0.750613	0.287	0.038	2.30194e-10	Pos
hdac9b1	1.54658e-14	0.836721	0.479	0.127	2.39968e-10	Pos
FO904901.11	2.49369e-14	0.684827	0.298	0.048	3.8692e-10	Pos
htra1b1	3.76778e-14	0.692134	0.309	0.049	5.84609e-10	Pos
abhd121	4.30979e-14	0.965627	0.447	0.131	6.68707e-10	Pos
arl13a1	4.45359e-14	0.626894	0.489	0.171	6.91019e-10	Pos
si:ch211-207l14.11	4.53574e-14	0.854077	0.447	0.112	7.03765e-10	Pos
mt-cyb1	6.40988e-14	0.633737	0.989	0.986	9.94557e-10	Pos
ndrg1a1	8.07032e-14	1.0241	0.532	0.196	1.25219e-09	Pos
lrit3a1	8.25988e-14	0.8887	0.362	0.07	1.2816e-09	Pos
gngt11	8.82612e-14	0.408181	0.979	0.841	1.36946e-09	Pos
lmbrd11	8.84996e-14	0.854856	0.543	0.187	1.37316e-09	Pos
rp1l1a1	1.51944e-13	0.601492	0.287	0.047	2.35756e-09	Pos
rhol1	1.55061e-13	0.780431	0.404	0.095	2.40593e-09	Pos
ppp1r181	2.22954e-13	0.708974	0.287	0.042	3.45935e-09	Pos
camk1db1	3.00185e-13	0.880293	0.574	0.231	4.65767e-09	Pos
rgs201	3.06452e-13	0.810669	0.436	0.116	4.75491e-09	Pos
tpd52l11	3.46309e-13	0.872876	0.564	0.2	5.37333e-09	Pos
zfand5a1	3.49296e-13	0.901779	0.511	0.174	5.41968e-09	Pos
eef1a1a1	4.53069e-13	0.703325	0.766	0.501	7.02982e-09	Pos
si:ch211-195b15.71	5.27268e-13	0.886887	0.489	0.147	8.1811e-09	Pos
pex51	5.46583e-13	0.707425	0.489	0.163	8.48079e-09	Pos
si:dkey-65b13.131	6.45729e-13	0.66137	0.255	0.035	1.00191e-08	Pos
glmnb1	7.4823e-13	0.498469	0.266	0.043	1.16095e-08	Pos
CABZ01117619.11	7.74111e-13	0.551471	0.298	0.056	1.20111e-08	Pos
impdh1a1	8.24511e-13	0.852461	0.426	0.11	1.27931e-08	Pos
si:dkey-172h23.21	8.48504e-13	0.620081	0.298	0.049	1.31654e-08	Pos
cep2901	8.80967e-13	0.755556	0.33	0.063	1.36691e-08	Pos
nhsl1a1	1.12564e-12	0.875116	0.426	0.128	1.74655e-08	Pos
tdrd7b1	1.25937e-12	0.676832	0.287	0.044	1.95404e-08	Pos
guca1b1	2.08088e-12	0.422364	0.628	0.317	3.22869e-08	Pos
zbtb181	2.25975e-12	0.666569	0.383	0.108	3.50622e-08	Pos
bzw21	3.19632e-12	0.672548	0.309	0.056	4.95941e-08	Pos
glsb1	4.3759e-12	0.672861	0.33	0.069	6.78965e-08	Pos
si:dkey-121a11.31	4.38697e-12	0.683238	0.34	0.073	6.80681e-08	Pos
pde6d1	4.6872e-12	0.745471	0.447	0.128	7.27265e-08	Pos
pde6b1	4.83726e-12	1.04905	0.543	0.211	7.50549e-08	Pos
eno1b1	6.48158e-12	0.709513	0.511	0.179	1.00568e-07	Pos
pde6ga1	7.1952e-12	0.39095	0.66	0.33	1.11641e-07	Pos
prlra1	8.9741e-12	0.845143	0.468	0.149	1.39242e-07	Pos
shroom2a1	1.81597e-11	0.675202	0.298	0.055	2.81766e-07	Pos
sv2ba1	1.92433e-11	0.819241	0.468	0.152	2.98579e-07	Pos
cdc14aa1	2.17676e-11	0.731008	0.255	0.038	3.37747e-07	Pos
ppp1r13ba1	2.21591e-11	0.685183	0.383	0.105	3.43821e-07	Pos
atp2a31	2.30441e-11	0.655641	0.287	0.051	3.57553e-07	Pos
rom1b1	2.33313e-11	0.456414	0.628	0.294	3.62009e-07	Pos
gnb1a1	2.76672e-11	0.688683	0.777	0.644	4.29284e-07	Pos
ric8a1	5.41941e-11	0.77034	0.489	0.168	8.40876e-07	Pos
nucb2a1	5.56801e-11	0.782552	0.426	0.128	8.63932e-07	Pos
sort1b1	6.08847e-11	0.805163	0.319	0.082	9.44687e-07	Pos
guca1a1	6.19092e-11	0.640926	0.33	0.077	9.60583e-07	Pos
si:ch211-276a17.51	1.63354e-10	0.804222	0.266	0.049	2.5346e-06	Pos
gucy2f1	1.97911e-10	0.722477	0.394	0.118	3.07079e-06	Pos
NC_002333.171	2.16091e-10	0.813819	0.585	0.259	3.35287e-06	Pos
mt-co21	2.35703e-10	0.507995	1	0.996	3.65717e-06	Pos
slc9a3r1a1	2.93066e-10	0.587504	0.255	0.049	4.54721e-06	Pos
farp21	3.49007e-10	0.659649	0.287	0.058	5.41519e-06	Pos
appa1	4.61517e-10	0.704247	0.691	0.393	7.1609e-06	Pos
kpna41	5.09428e-10	0.656561	0.436	0.145	7.90428e-06	Pos
serinc11	5.27281e-10	0.590147	0.851	0.614	8.18129e-06	Pos
oaz2a1	5.48655e-10	0.788259	0.521	0.213	8.51293e-06	Pos
slc16a6b1	5.7285e-10	0.709371	0.277	0.058	8.88833e-06	Pos
myo3a1	6.21242e-10	0.670333	0.362	0.101	9.6392e-06	Pos
samd111	6.57254e-10	0.769594	0.34	0.094	1.0198e-05	Pos
si:dkey-17e16.151	6.68615e-10	0.558894	0.383	0.119	1.03742e-05	Pos
chac11	9.56978e-10	0.686212	0.713	0.457	1.48485e-05	Pos
mbnl21	9.62417e-10	0.849993	0.394	0.141	1.49329e-05	Pos
gnb1b1	1.35034e-09	0.707924	0.798	0.689	2.09519e-05	Pos
serinc41	1.35326e-09	0.690568	0.362	0.104	2.09972e-05	Pos
fkbp161	1.62703e-09	0.586597	0.372	0.114	2.52451e-05	Pos
fam13b1	1.85084e-09	0.722947	0.66	0.389	2.87176e-05	Pos
mt-nd21	2.14864e-09	0.443502	0.989	0.92	3.33383e-05	Pos
gadd45ga1	2.2334e-09	0.823292	0.362	0.105	3.46534e-05	Pos
abca4b1	2.73546e-09	0.686283	0.362	0.104	4.24435e-05	Pos
adarb1a1	3.51893e-09	0.673603	0.319	0.08	5.45997e-05	Pos
kcnv2a1	4.25636e-09	0.688459	0.383	0.121	6.60416e-05	Pos
pgd1	5.00204e-09	0.616895	0.287	0.066	7.76117e-05	Pos
nexn1	5.49445e-09	0.542931	0.266	0.064	8.52519e-05	Pos
aanat21	5.89339e-09	0.609016	0.255	0.053	9.14419e-05	Pos
zgc:1540931	5.89589e-09	0.503871	0.351	0.123	9.14807e-05	Pos
si:zfos-943e10.11	7.31716e-09	0.669802	0.277	0.065	0.000113533	Pos
plekho1b1	9.79666e-09	0.592725	0.436	0.165	0.000152005	Pos
mapre3b1	1.30593e-08	0.642302	0.543	0.24	0.000202628	Pos
ptmab1	1.32801e-08	0.292782	0.989	0.936	0.000206054	Pos
prom1a1	1.35723e-08	0.696614	0.479	0.209	0.000210588	Pos
pdcl1	1.63075e-08	0.701967	0.564	0.325	0.000253028	Pos
ppa1b1	2.1919e-08	0.741264	0.394	0.148	0.000340095	Pos
ppp1caa1	2.29896e-08	0.675076	0.426	0.165	0.000356707	Pos
CABZ01056321.11	3.08119e-08	0.393328	0.255	0.069	0.000478077	Pos
si:ch1073-155h21.21	3.59159e-08	0.587138	0.277	0.074	0.000557271	Pos
tmem184ba1	3.82584e-08	0.54695	0.362	0.117	0.000593617	Pos
foxo41	4.23288e-08	0.68007	0.479	0.2	0.000656774	Pos
cuedc1a1	4.27069e-08	0.483921	0.309	0.089	0.00066264	Pos
foxo1a1	5.07889e-08	0.497949	0.287	0.077	0.000788041	Pos
rp21	5.60563e-08	0.694523	0.319	0.093	0.000869769	Pos
tmem2441	6.30769e-08	0.401849	0.34	0.124	0.000978701	Pos
si:cabz01102082.11	6.59831e-08	0.741279	0.372	0.134	0.00102379	Pos
arhgap12b1	6.90775e-08	0.518508	0.309	0.091	0.00107181	Pos
dyrk41	1.22296e-07	0.697811	0.319	0.101	0.00189755	Pos
si:ch211-207i1.21	1.51416e-07	0.440097	0.255	0.068	0.00234937	Pos
got2a1	1.7382e-07	0.684137	0.34	0.125	0.00269699	Pos
BX004774.21	1.7962e-07	0.257764	0.287	0.102	0.00278698	Pos
oxr1b1	2.12524e-07	0.649078	0.426	0.177	0.00329753	Pos
map7d31	2.21017e-07	0.444906	0.287	0.088	0.0034293	Pos
map1ab1	3.36755e-07	0.53669	0.628	0.367	0.0052251	Pos
mink11	3.46049e-07	0.541822	0.309	0.094	0.00536929	Pos
mt-atp81	3.94169e-07	0.635206	0.585	0.312	0.00611592	Pos
tbc1d10aa1	4.44347e-07	0.542334	0.277	0.079	0.00689449	Pos
cox4i21	5.31775e-07	0.452763	0.436	0.185	0.00825102	Pos
zfand5b1	7.23173e-07	0.606358	0.532	0.267	0.0112207	Pos
atp1a3b1	7.27647e-07	0.38324	0.713	0.487	0.0112902	Pos
nr1d2b1	7.99965e-07	0.474849	0.489	0.263	0.0124123	Pos
csnk1da1	8.81902e-07	0.656649	0.447	0.211	0.0136836	Pos
slc25a331	9.02134e-07	0.518141	0.415	0.17	0.0139975	Pos
gcdha1	9.62373e-07	0.471911	0.255	0.069	0.0149322	Pos
sema4ab1	1.17414e-06	0.584524	0.266	0.075	0.0182179	Pos
tmem30ab1	1.19229e-06	0.464648	0.33	0.118	0.0184995	Pos
si:ch211-212k18.41	1.74001e-06	0.606423	0.34	0.126	0.0269979	Pos
slc25a51	2.62883e-06	0.333973	0.989	0.924	0.0407889	Pos
ppp1r14bb1	2.62909e-06	0.450334	0.255	0.075	0.040793	Pos
ip6k2a1	2.92918e-06	0.45978	0.67	0.394	0.0454492	Pos
tpd52l2a1	3.08e-06	0.554491	0.362	0.138	0.0477893	Pos
syne2b1	3.46075e-06	0.484022	0.298	0.105	0.053697	Pos
insra1	3.47514e-06	0.502417	0.255	0.073	0.0539203	Pos
BX510923.11	4.79299e-06	0.510909	0.34	0.132	0.074368	Pos
znf5361	5.45664e-06	0.572936	0.372	0.163	0.0846652	Pos
fryl1	5.59602e-06	0.658133	0.319	0.126	0.0868279	Pos
tnrc6a1	7.05078e-06	0.514561	0.489	0.257	0.1094	Pos
hacd21	8.37743e-06	0.528007	0.351	0.139	0.129984	Pos
ubiad11	1.09838e-05	0.493215	0.33	0.131	0.170425	Pos
per21	1.1482e-05	0.415137	0.553	0.309	0.178155	Pos
polr2a1	1.26488e-05	0.54523	0.404	0.182	0.196259	Pos
cdc14ab1	1.32067e-05	0.576691	0.351	0.143	0.204915	Pos
slc20a1b1	1.56417e-05	0.388112	0.34	0.141	0.242696	Pos
amd11	1.91293e-05	0.368989	0.702	0.472	0.296811	Pos
lactbl1b1	2.22953e-05	0.385704	0.298	0.118	0.345934	Pos
eif3c1	2.56444e-05	0.446683	0.394	0.176	0.397898	Pos
msi11	2.58612e-05	0.380275	0.479	0.272	0.401262	Pos
ip6k11	2.67492e-05	0.529961	0.309	0.127	0.41504	Pos
si:dkeyp-72e1.91	2.71985e-05	0.318213	0.287	0.121	0.422012	Pos
yipf31	2.72498e-05	0.398314	0.277	0.1	0.422807	Pos
22341	3.13922e-05	0.37709	0.33	0.136	0.487081	Pos
dio3b1	3.15258e-05	0.550351	0.309	0.126	0.489154	Pos
chchd101	4.07787e-05	0.513273	0.681	0.483	0.632722	Pos
rab3aa1	4.42303e-05	0.296629	0.415	0.22	0.686278	Pos
ppp3r1b1	4.45209e-05	0.35953	0.511	0.288	0.690787	Pos
adipor21	4.8214e-05	0.422714	0.319	0.134	0.748089	Pos
vps361	5.8652e-05	0.396148	0.287	0.114	0.910044	Pos
psme4b1	6.92001e-05	0.42536	0.255	0.09	1	Pos
lin7c1	9.65125e-05	0.382003	0.266	0.099	1	Pos
taok1b1	0.000109241	0.457921	0.309	0.13	1	Pos
nptx1l1	0.000146835	0.397516	0.319	0.139	1	Pos
ndufs8a1	0.00015085	0.526548	0.34	0.155	1	Pos
MARK41	0.000239785	0.350956	0.383	0.22	1	Pos
skia1	0.000251414	0.521481	0.298	0.133	1	Pos
macf1a1	0.000430467	0.501044	0.287	0.128	1	Pos
atp11a1	0.000447569	0.439877	0.255	0.1	1	Pos
arrdc3a1	0.000464501	0.497462	0.426	0.237	1	Pos
tnip11	0.000476694	0.484681	0.394	0.216	1	Pos
zgc:1015661	0.000480849	0.442009	0.255	0.104	1	Pos
h3f3b.1.11	0.000482758	0.297815	0.734	0.523	1	Pos
ube2g1b1	0.000526912	0.352943	0.319	0.147	1	Pos
uqcrc2a1	0.000713574	0.322421	0.255	0.11	1	Pos
mfap3l1	0.000722626	0.411006	0.298	0.141	1	Pos
clasp21	0.000922483	0.467794	0.287	0.141	1	Pos
canx1	0.000942453	0.319865	0.436	0.271	1	Pos
pcyt21	0.00114824	0.316252	0.266	0.117	1	Pos
cpe1	0.00138871	0.290386	0.766	0.583	1	Pos
arg21	0.00140132	0.335457	0.787	0.617	1	Pos
tjp1b1	0.00149472	0.285409	0.255	0.115	1	Pos
zgc:928181	0.00164034	0.398911	0.34	0.171	1	Pos
cry1ba1	0.00170671	0.341595	0.277	0.13	1	Pos
hnrnpm1	0.00180251	0.30812	0.351	0.185	1	Pos
iscub1	0.00207658	0.266709	0.606	0.471	1	Pos
atp6ap1a1	0.00253119	0.353302	0.362	0.194	1	Pos
kpna11	0.00254937	0.326242	0.255	0.125	1	Pos
b4galt61	0.00309291	0.346351	0.255	0.114	1	Pos
phb1	0.00316174	0.338868	0.266	0.128	1	Pos
susd61	0.0032379	0.256538	0.319	0.172	1	Pos
dnajc5ga1	0.00341644	0.393295	0.394	0.23	1	Pos
arl31	0.00483305	0.297733	0.266	0.128	1	Pos
dgcr21	0.00498314	0.296114	0.351	0.214	1	Pos
mdh21	0.00523974	0.31436	0.564	0.392	1	Pos
chd91	0.00544843	0.401323	0.255	0.133	1	Pos
rnf101	0.0058832	0.361502	0.521	0.349	1	Pos
akap8l1	0.00590253	0.308732	0.479	0.313	1	Pos
lancl11	0.00597963	0.267476	0.266	0.132	1	Pos
retreg31	0.00691298	0.30953	0.255	0.123	1	Pos
camk2g21	0.00793551	0.270517	0.319	0.18	1	Pos
selenou1a1	0.00935697	0.275408	0.489	0.321	1	Pos
ddx61	0.00974552	0.298783	0.553	0.381	1	Pos

## Sheet: LWS2 enriched
	p_val	avg_logFC	pct.1	pct.2	p_val_adj	cluster
opn1lw21	0	3.27144	1	0	0	Pos
arr3a1	1.71947e-133	2.51571	0.779	0.27	2.66793e-129	Pos
gnb3b1	1.9912e-98	2.01195	0.739	0.177	3.08955e-94	Pos
grk7a1	4.83004e-98	2.04897	0.688	0.08	7.49428e-94	Pos
rcvrn31	6.86646e-96	2.07075	0.688	0.114	1.0654e-91	Pos
pdcb1	1.59892e-95	1.96399	0.744	0.131	2.48088e-91	Pos
gngt2b1	7.39881e-90	1.53712	0.794	0.435	1.148e-85	Pos
rcvrn21	1.05291e-85	1.97853	0.688	0.134	1.6337e-81	Pos
slc1a2a1	3.34678e-85	1.65572	0.653	0.079	5.19287e-81	Pos
atp1b2b1	2.02649e-83	1.64358	0.809	0.272	3.1443e-79	Pos
gnat21	3.49872e-82	1.68063	0.683	0.114	5.42862e-78	Pos
prph2a1	8.77588e-81	1.55376	0.608	0.059	1.36167e-76	Pos
guca1c1	2.56231e-80	1.76618	0.724	0.169	3.97568e-76	Pos
ppm1na1	2.4359e-79	1.68967	0.613	0.069	3.77954e-75	Pos
slc24a21	6.76068e-79	1.59946	0.623	0.073	1.04899e-74	Pos
nin1	9.01834e-78	1.69365	0.558	0.05	1.39929e-73	Pos
pde6c1	1.48937e-77	1.68327	0.683	0.114	2.3109e-73	Pos
si:ch1073-303d10.11	4.96968e-73	1.65542	0.568	0.068	7.71096e-69	Pos
si:dkey-97a13.121	1.25435e-72	1.66134	0.583	0.068	1.94625e-68	Pos
camk1gb1	2.32911e-70	1.44285	0.779	0.226	3.61384e-66	Pos
saga1	5.21935e-69	1.72445	0.698	0.22	8.09834e-65	Pos
prph2b1	1.92866e-67	1.5407	0.683	0.148	2.9925e-63	Pos
PLEKHB11	5.13422e-67	1.51239	0.518	0.055	7.96626e-63	Pos
clul11	6.02317e-66	1.41194	0.553	0.064	9.34555e-62	Pos
mt-co31	3.93674e-64	1.24594	0.99	0.976	6.10825e-60	Pos
kcnb21	1.55088e-59	1.2535	0.673	0.145	2.40634e-55	Pos
six71	2.33453e-59	1.27931	0.452	0.04	3.62226e-55	Pos
rbp31	3.60856e-57	1.39116	0.774	0.299	5.59904e-53	Pos
pde6ha1	4.31783e-57	1.09936	0.99	0.966	6.69954e-53	Pos
rbp4l1	4.51589e-54	0.904172	0.985	0.882	7.00686e-50	Pos
rho1	5.74637e-54	1.29586	0.96	0.906	8.91607e-50	Pos
cdk5r2b1	3.40065e-53	1.2736	0.508	0.07	5.27645e-49	Pos
inaa1	7.46256e-53	1.33285	0.503	0.072	1.15789e-48	Pos
si:cabz01076231.11	2.49514e-52	1.10321	0.462	0.055	3.87146e-48	Pos
dclk2a1	2.78727e-52	1.3544	0.558	0.125	4.32472e-48	Pos
rom1a1	4.57898e-52	1.46565	0.598	0.151	7.10474e-48	Pos
zgc:664331	1.65716e-51	1.11941	0.472	0.062	2.57125e-47	Pos
atp2b1b1	6.65654e-51	1.25009	0.623	0.14	1.03283e-46	Pos
gnb5b1	7.20598e-51	1.26664	0.719	0.263	1.11808e-46	Pos
slc25a3a1	1.17641e-49	1.26052	0.528	0.087	1.82532e-45	Pos
pde6a1	6.17696e-49	1.39274	0.653	0.253	9.58418e-45	Pos
gngt2a1	1.42061e-48	1.13766	0.693	0.213	2.20422e-44	Pos
paplna1	1.72456e-48	1.12187	0.457	0.059	2.67583e-44	Pos
scamp5b1	1.7989e-48	1.18447	0.477	0.071	2.79118e-44	Pos
crx1	2.80937e-47	1.1511	0.754	0.329	4.35902e-43	Pos
grk1a1	3.72904e-47	1.41215	0.563	0.141	5.78598e-43	Pos
si:ch211-207l14.11	4.11369e-47	1.19274	0.523	0.096	6.38279e-43	Pos
mt-nd31	4.49351e-47	1.0231	0.965	0.855	6.97213e-43	Pos
slc38a5a1	1.61951e-46	1.16845	0.467	0.068	2.51283e-42	Pos
thrb1	1.5815e-45	1.15141	0.382	0.043	2.45386e-41	Pos
pde6gb1	8.43344e-45	1.06361	0.905	0.735	1.30853e-40	Pos
es11	9.3855e-45	1.04863	0.688	0.254	1.45625e-40	Pos
si:dkey-190l8.21	2.29511e-44	1.04972	0.442	0.062	3.5611e-40	Pos
ndrg1b1	7.6351e-44	1.18163	0.402	0.05	1.18466e-39	Pos
laptm4b1	1.46291e-43	0.870917	0.879	0.644	2.26985e-39	Pos
zgc:1952451	1.74069e-43	1.06932	0.437	0.063	2.70086e-39	Pos
sagb1	4.24076e-42	1.20791	0.794	0.445	6.57997e-38	Pos
ncaldb1	1.46673e-41	1.11932	0.588	0.148	2.27578e-37	Pos
opn6a1	1.64909e-41	1.05114	0.362	0.038	2.55872e-37	Pos
gnat11	1.76341e-41	1.1163	0.819	0.502	2.7361e-37	Pos
mt-co11	5.57427e-41	0.873158	0.995	0.984	8.64904e-37	Pos
slc25a25a1	2.29859e-40	1.19791	0.472	0.097	3.56649e-36	Pos
pde6b1	1.82683e-39	1.31047	0.583	0.197	2.8345e-35	Pos
pdca1	2.56306e-39	1.05584	0.769	0.362	3.97684e-35	Pos
usp211	2.52762e-38	1.01169	0.452	0.081	3.92186e-34	Pos
sypb1	2.72983e-38	0.944753	0.794	0.421	4.2356e-34	Pos
mbnl21	3.8187e-38	1.16763	0.477	0.128	5.92509e-34	Pos
slkb1	1.15814e-37	1.13181	0.583	0.184	1.79696e-33	Pos
ndrg1a1	1.51187e-37	1.14156	0.573	0.183	2.34582e-33	Pos
cngb3.11	3.61492e-37	0.878498	0.302	0.027	5.60891e-33	Pos
hexb1	3.96282e-37	1.02041	0.382	0.054	6.14871e-33	Pos
gnb1b1	1.12963e-36	0.95929	0.824	0.684	1.75274e-32	Pos
opn4.11	1.34765e-36	1.00799	0.372	0.051	2.09102e-32	Pos
gucy2f1	2.19316e-36	1.07522	0.462	0.105	3.40291e-32	Pos
abca4b1	4.95125e-36	1.02144	0.447	0.09	7.68236e-32	Pos
osbpl71	5.84142e-36	1.05251	0.492	0.119	9.06355e-32	Pos
guk1b1	1.08556e-35	1.11968	0.482	0.107	1.68436e-31	Pos
mt-nd4l1	2.5606e-35	1.09583	0.553	0.158	3.97303e-31	Pos
mdh1ab1	6.19267e-35	1.02301	0.548	0.16	9.60854e-31	Pos
arl3l11	1.36818e-34	0.875721	0.523	0.132	2.12287e-30	Pos
kcnv2b1	1.4532e-34	0.874517	0.266	0.02	2.25479e-30	Pos
si:dkey-172h23.21	5.31503e-34	0.839811	0.327	0.039	8.2468e-30	Pos
elovl4b1	7.07599e-34	0.893723	0.678	0.284	1.09791e-29	Pos
arl3l21	9.66193e-34	0.939109	0.583	0.186	1.49914e-29	Pos
rp1l1a1	1.53564e-33	0.903742	0.312	0.038	2.38271e-29	Pos
rgs9b1	6.57639e-33	0.971644	0.487	0.125	1.02039e-28	Pos
fstl51	1.1579e-32	0.873822	0.724	0.353	1.7966e-28	Pos
si:ch1073-111c8.31	5.93683e-32	0.760395	0.834	0.467	9.21158e-28	Pos
cdhr1a1	6.91345e-32	0.935892	0.402	0.077	1.07269e-27	Pos
impdh1a1	7.60608e-32	0.943785	0.442	0.098	1.18016e-27	Pos
CABZ01117619.11	8.32812e-32	0.874871	0.332	0.045	1.29219e-27	Pos
si:ch211-285j22.31	4.20567e-31	0.762334	0.583	0.193	6.52551e-27	Pos
tmem237a1	1.64854e-30	0.813708	0.372	0.07	2.55788e-26	Pos
mt-nd51	1.65684e-30	0.836898	0.824	0.5	2.57075e-26	Pos
unc119b1	2.30964e-30	0.961953	0.598	0.231	3.58363e-26	Pos
mt-atp61	2.66152e-30	0.71635	1	0.997	4.12962e-26	Pos
arl13a1	2.98324e-30	0.794144	0.528	0.158	4.6288e-26	Pos
si:ch211-237l4.61	6.21636e-30	0.911615	0.688	0.306	9.64531e-26	Pos
prom1b1	1.49278e-29	0.995675	0.508	0.146	2.3162e-25	Pos
pex51	1.78539e-29	0.883365	0.508	0.151	2.77022e-25	Pos
scg31	1.84112e-29	0.845447	0.734	0.372	2.85669e-25	Pos
guca1b1	4.31641e-29	0.4211	0.668	0.304	6.69734e-25	Pos
dyrk41	6.59074e-29	0.962657	0.387	0.089	1.02262e-24	Pos
FO904901.11	1.53146e-28	0.862072	0.296	0.04	2.37621e-24	Pos
camkk1b1	5.03102e-28	0.950615	0.382	0.079	7.80613e-24	Pos
si:dkey-121a11.31	8.55471e-28	0.730228	0.337	0.065	1.32735e-23	Pos
slc25a241	1.0493e-27	0.858015	0.276	0.035	1.62809e-23	Pos
gnb1a1	1.8162e-26	0.747257	0.794	0.638	2.81802e-22	Pos
mt-nd41	3.86961e-26	0.639376	0.97	0.902	6.00409e-22	Pos
hif1ab1	4.31939e-26	0.793517	0.744	0.415	6.70196e-22	Pos
tdrd7b1	4.76713e-26	0.699708	0.266	0.038	7.39668e-22	Pos
si:ch73-28h20.11	6.61941e-26	0.708908	0.312	0.059	1.02707e-21	Pos
map1ab1	7.31735e-26	0.79629	0.688	0.355	1.13536e-21	Pos
lrit3a1	1.16328e-25	0.711773	0.327	0.062	1.80495e-21	Pos
si:ch211-195b15.71	1.6708e-25	0.883637	0.462	0.137	2.59241e-21	Pos
gngt11	2.50103e-25	0.566154	0.945	0.839	3.8806e-21	Pos
ablim31	3.52372e-25	0.728578	0.317	0.057	5.46741e-21	Pos
CU659670.11	7.3895e-25	0.773832	0.251	0.034	1.14655e-20	Pos
nhsl1a1	9.38537e-25	0.806737	0.412	0.119	1.45623e-20	Pos
stxbp1b1	1.77889e-24	0.783029	0.578	0.227	2.76012e-20	Pos
nme2a1	2.9331e-24	0.431985	0.487	0.179	4.551e-20	Pos
zgc:1621441	6.96057e-24	0.563856	0.578	0.258	1.08e-19	Pos
mt-nd11	8.39753e-24	0.58166	0.98	0.951	1.30296e-19	Pos
nucb2a1	3.63237e-23	0.693253	0.422	0.119	5.63598e-19	Pos
frya1	3.92448e-23	0.719641	0.392	0.103	6.08922e-19	Pos
pde6ga1	4.47173e-23	0.336474	0.628	0.321	6.93833e-19	Pos
eef1a1a1	5.67002e-23	0.670509	0.789	0.491	8.79761e-19	Pos
prom1a1	2.68607e-22	0.810062	0.513	0.198	4.16771e-18	Pos
lmbrd11	3.75436e-22	0.766719	0.497	0.178	5.82527e-18	Pos
shroom2a1	4.40497e-22	0.726391	0.271	0.048	6.83475e-18	Pos
rhol1	6.35114e-22	0.714658	0.352	0.088	9.85442e-18	Pos
nt5c3a1	7.31923e-22	0.769017	0.302	0.06	1.13565e-17	Pos
rom1b1	9.28185e-22	0.550591	0.608	0.284	1.44017e-17	Pos
eno1b1	1.63295e-21	0.700341	0.472	0.171	2.53369e-17	Pos
tmem30ab1	5.12859e-21	0.639151	0.377	0.108	7.95752e-17	Pos
fam13b1	1.19721e-20	0.756422	0.648	0.381	1.85759e-16	Pos
kcnv2a1	1.62014e-20	0.701004	0.382	0.112	2.51381e-16	Pos
si:cabz01102082.11	2.16275e-20	0.818909	0.392	0.125	3.35572e-16	Pos
si:ch211-113d22.21	3.19544e-20	0.310765	0.899	0.679	4.95804e-16	Pos
slc7a3a1	3.30776e-20	0.814679	0.332	0.091	5.13232e-16	Pos
ckmt2a1	3.31621e-20	0.576538	0.307	0.075	5.14543e-16	Pos
farp21	3.74065e-20	0.619669	0.271	0.051	5.80399e-16	Pos
foxo41	5.71838e-20	0.768135	0.487	0.191	8.87264e-16	Pos
prlra1	6.39677e-20	0.701084	0.432	0.14	9.92523e-16	Pos
znf5361	6.83337e-20	0.780547	0.427	0.153	1.06027e-15	Pos
mt-atp81	7.25833e-20	0.672802	0.628	0.3	1.1262e-15	Pos
camk1db1	1.23607e-19	0.776659	0.528	0.222	1.91788e-15	Pos
sez6a1	2.2559e-19	0.726748	0.337	0.091	3.50026e-15	Pos
abhd121	2.85349e-19	0.801375	0.372	0.125	4.42747e-15	Pos
glsb1	4.26517e-19	0.675582	0.286	0.063	6.61783e-15	Pos
si:dkey-61n16.51	6.069e-19	0.749965	0.482	0.18	9.41667e-15	Pos
mt-cyb1	6.26818e-19	0.490274	1	0.986	9.72571e-15	Pos
adipor21	6.57996e-19	0.534889	0.367	0.124	1.02095e-14	Pos
si:ch211-207i1.21	7.79876e-19	0.551505	0.271	0.061	1.21006e-14	Pos
guca1a1	1.45846e-18	0.574649	0.281	0.072	2.26294e-14	Pos
pde6d1	2.57168e-18	0.629132	0.382	0.122	3.99022e-14	Pos
opn1sw21	3.04624e-18	1.36611	0.251	0.066	4.72654e-14	Pos
ppp1r13ba1	4.10562e-18	0.669636	0.337	0.098	6.37027e-14	Pos
sv2ba1	4.1491e-18	0.727043	0.422	0.145	6.43774e-14	Pos
si:ch211-198m17.11	7.82253e-18	0.517309	0.256	0.06	1.21374e-13	Pos
rgs201	8.88725e-18	0.798833	0.352	0.111	1.37895e-13	Pos
CABZ01056321.11	9.14393e-18	0.599974	0.276	0.062	1.41877e-13	Pos
BX510923.11	1.49417e-17	0.671459	0.382	0.123	2.31835e-13	Pos
gadd45ga1	2.36304e-17	0.631323	0.332	0.098	3.66649e-13	Pos
zgc:1623311	3.23376e-17	0.497401	0.276	0.07	5.0175e-13	Pos
si:ch1073-155h21.21	4.3784e-17	0.513487	0.261	0.068	6.79353e-13	Pos
si:dkey-17e16.151	4.92058e-17	0.501446	0.347	0.113	7.63478e-13	Pos
pdcl1	8.99497e-17	0.634087	0.603	0.315	1.39566e-12	Pos
zfand5a1	1.95368e-16	0.656848	0.432	0.167	3.03133e-12	Pos
arr3b1	2.0158e-16	0.90844	0.487	0.226	3.12772e-12	Pos
hdac9b1	2.72556e-16	0.693652	0.367	0.122	4.22897e-12	Pos
pdha1b1	2.9695e-16	0.700483	0.251	0.054	4.60748e-12	Pos
atp1a3b1	3.99003e-16	0.542216	0.739	0.478	6.19093e-12	Pos
ppa1b1	5.26557e-16	0.719665	0.382	0.14	8.17005e-12	Pos
ptmab1	1.63136e-15	0.304131	1	0.934	2.53122e-11	Pos
got2a1	2.28337e-15	0.702205	0.342	0.118	3.54287e-11	Pos
samd111	3.14251e-15	0.687316	0.291	0.089	4.87592e-11	Pos
NC_002333.171	3.21128e-15	0.703447	0.528	0.252	4.98263e-11	Pos
myo3a1	3.41507e-15	0.529925	0.317	0.096	5.29883e-11	Pos
fkbp161	7.01562e-15	0.706049	0.337	0.108	1.08854e-10	Pos
syt5a1	9.78472e-15	0.49381	0.548	0.267	1.5182e-10	Pos
unc119.21	2.14154e-14	0.514983	0.327	0.111	3.32281e-10	Pos
mt-co21	2.47436e-14	0.372531	1	0.996	3.83922e-10	Pos
zbtb181	2.47966e-14	0.49482	0.296	0.105	3.84744e-10	Pos
foxo1a1	2.69355e-14	0.572124	0.266	0.071	4.17932e-10	Pos
ppdpfa1	6.52104e-14	0.274282	0.935	0.837	1.0118e-09	Pos
syne1a1	1.0326e-13	0.493882	0.296	0.095	1.60218e-09	Pos
serinc41	2.70313e-13	0.54632	0.307	0.098	4.19417e-09	Pos
iscub1	2.71443e-13	0.491483	0.719	0.459	4.21171e-09	Pos
slc25a51	2.81703e-13	0.30941	0.985	0.923	4.3709e-09	Pos
sort1b1	3.33904e-13	0.586613	0.256	0.078	5.18086e-09	Pos
ric8a1	3.39181e-13	0.566225	0.402	0.163	5.26274e-09	Pos
tmem184ba1	6.72673e-13	0.544802	0.317	0.112	1.04372e-08	Pos
faimb1	6.92874e-13	0.433173	0.317	0.119	1.07506e-08	Pos
chac11	9.18117e-13	0.539081	0.668	0.451	1.42455e-08	Pos
msi11	1.15618e-12	0.414106	0.513	0.263	1.79394e-08	Pos
mt-nd21	1.23134e-12	0.367565	0.955	0.919	1.91055e-08	Pos
mapre3b1	1.41639e-12	0.570797	0.477	0.234	2.19768e-08	Pos
oxr1b1	1.49664e-12	0.525482	0.402	0.171	2.32219e-08	Pos
arrdc3a1	1.5674e-12	0.572514	0.472	0.228	2.43198e-08	Pos
mid1ip1l1	1.64197e-12	0.406977	0.563	0.3	2.54768e-08	Pos
BX004774.21	2.80596e-12	0.319265	0.271	0.097	4.35373e-08	Pos
tmem2441	6.98831e-12	0.563773	0.317	0.118	1.08431e-07	Pos
serinc11	9.15024e-12	0.433191	0.824	0.608	1.41975e-07	Pos
plekho1b1	9.41898e-12	0.378788	0.362	0.16	1.46145e-07	Pos
MARK41	1.10255e-11	0.535047	0.437	0.212	1.71072e-07	Pos
ubiad11	6.46691e-11	0.383497	0.302	0.127	1.00341e-06	Pos
nptx1l1	6.54437e-11	0.323482	0.317	0.133	1.01542e-06	Pos
ppp3r1b1	9.10568e-11	0.477926	0.508	0.281	1.41284e-06	Pos
nr1d2b1	1.13558e-10	0.516361	0.472	0.257	1.76196e-06	Pos
psme4b1	1.21878e-10	0.487463	0.251	0.085	1.89105e-06	Pos
tnrc6a1	1.74037e-10	0.480633	0.472	0.251	2.70035e-06	Pos
zgc:1540931	1.80446e-10	0.350854	0.286	0.119	2.7998e-06	Pos
opn1sw11	2.06703e-10	0.67683	0.392	0.186	3.2072e-06	Pos
polr2a1	2.89661e-10	0.547157	0.372	0.176	4.49439e-06	Pos
cdc14ab1	3.1515e-10	0.464015	0.317	0.139	4.88987e-06	Pos
chchd101	3.36432e-10	0.436987	0.709	0.474	5.22007e-06	Pos
vps361	4.47896e-10	0.397211	0.281	0.108	6.94955e-06	Pos
arhgap12b1	4.94405e-10	0.461281	0.256	0.087	7.67119e-06	Pos
csnk1a11	6.43881e-10	0.512295	0.477	0.277	9.99046e-06	Pos
per21	7.83222e-10	0.46949	0.538	0.302	1.21525e-05	Pos
slc12a7b1	8.35954e-10	0.498929	0.382	0.173	1.29707e-05	Pos
si:ch73-281n10.21	1.03159e-09	0.301558	0.859	0.671	1.60062e-05	Pos
jakmip21	1.06842e-09	0.498636	0.296	0.115	1.65776e-05	Pos
syne2b1	1.36296e-09	0.411632	0.266	0.101	2.11477e-05	Pos
CU571318.11	1.37728e-09	0.460383	0.261	0.096	2.13699e-05	Pos
cpe1	1.50209e-09	0.372015	0.784	0.576	2.33064e-05	Pos
tpd52l11	1.81989e-09	0.495247	0.407	0.198	2.82373e-05	Pos
nfs11	1.85201e-09	0.486007	0.251	0.088	2.87358e-05	Pos
ndufs8b1	1.98702e-09	0.400452	0.312	0.134	3.08306e-05	Pos
slc25a331	2.48056e-09	0.525613	0.362	0.165	3.84884e-05	Pos
si:ch211-63p21.11	1.33325e-08	0.267657	0.568	0.362	0.000206867	Pos
si:dkeyp-72e1.91	1.36008e-08	0.403428	0.281	0.115	0.00021103	Pos
tpd52l2a1	1.49521e-08	0.372513	0.302	0.135	0.000231997	Pos
ddx61	2.16187e-08	0.427053	0.583	0.373	0.000335436	Pos
appa1	3.06767e-08	0.449638	0.598	0.389	0.00047598	Pos
csnk1da1	3.79872e-08	0.508083	0.387	0.207	0.000589409	Pos
ppp1caa1	4.3328e-08	0.413745	0.337	0.162	0.000672277	Pos
per1b1	4.53789e-08	0.336831	0.623	0.406	0.000704099	Pos
fryl1	5.63306e-08	0.51414	0.286	0.122	0.000874026	Pos
eif3c1	6.04413e-08	0.459045	0.342	0.172	0.000937807	Pos
taok1b1	7.92882e-08	0.345882	0.271	0.126	0.00123024	Pos
zfand5b1	8.85659e-08	0.471013	0.457	0.262	0.00137419	Pos
dnajc5ga1	1.03044e-07	0.371137	0.407	0.224	0.00159883	Pos
supt6h1	1.20091e-07	0.40009	0.302	0.145	0.00186333	Pos
22341	1.2417e-07	0.338074	0.291	0.132	0.00192662	Pos
ip6k2a1	1.24656e-07	0.303611	0.593	0.39	0.00193417	Pos
add21	1.48039e-07	0.409763	0.266	0.117	0.00229697	Pos
camk2g11	1.52315e-07	0.397507	0.412	0.228	0.00236332	Pos
pkib1	1.76212e-07	0.326272	0.528	0.329	0.00273411	Pos
macf1a1	1.95782e-07	0.421329	0.281	0.123	0.00303775	Pos
hacd21	2.98212e-07	0.402282	0.291	0.135	0.00462705	Pos
amd11	3.23605e-07	0.316401	0.663	0.467	0.00502106	Pos
prpf81	3.49135e-07	0.417896	0.256	0.108	0.00541718	Pos
mfap3l1	4.89399e-07	0.394907	0.286	0.136	0.00759352	Pos
rab3aa1	5.5851e-07	0.350166	0.392	0.215	0.00866584	Pos
cry1ba1	6.10243e-07	0.342054	0.276	0.125	0.00946853	Pos
nme31	6.31182e-07	0.3459	0.276	0.126	0.00979343	Pos
retreg31	6.75292e-07	0.293448	0.256	0.119	0.0104778	Pos
tcf121	6.93911e-07	0.337675	0.322	0.161	0.0107667	Pos
dgcr21	8.18e-07	0.425073	0.382	0.208	0.0126921	Pos
ndufs8a1	8.76874e-07	0.403585	0.312	0.151	0.0136056	Pos
oaz2a1	1.12958e-06	0.369975	0.387	0.211	0.0175265	Pos
camk2g21	1.2135e-06	0.300622	0.332	0.174	0.0188286	Pos
azin1b1	2.57115e-06	0.353414	0.417	0.246	0.039894	Pos
pgam1b1	2.77514e-06	0.359647	0.538	0.368	0.0430591	Pos
gdi21	3.08243e-06	0.370213	0.392	0.233	0.0478271	Pos
si:ch211-212k18.41	3.60685e-06	0.372054	0.266	0.124	0.0559639	Pos
phb1	4.65489e-06	0.36568	0.261	0.123	0.0722253	Pos
skia1	6.5748e-06	0.324854	0.261	0.13	0.102015	Pos
kpna41	6.94564e-06	0.354759	0.286	0.145	0.107769	Pos
atf4a1	9.35636e-06	0.356653	0.518	0.386	0.145173	Pos
chchd3a1	1.20655e-05	0.363754	0.266	0.128	0.187208	Pos
ubtf1	3.26908e-05	0.354636	0.266	0.134	0.507231	Pos
ip6k11	3.9459e-05	0.340537	0.251	0.124	0.612245	Pos
prmt11	4.21713e-05	0.322927	0.583	0.419	0.65433	Pos
bbip11	4.89081e-05	0.300101	0.307	0.167	0.758858	Pos
h3f3b.1.11	5.27258e-05	0.256681	0.688	0.519	0.818093	Pos
canx1	6.48559e-05	0.340135	0.412	0.267	1	Pos
ccdc571	7.18638e-05	0.314215	0.402	0.262	1	Pos
sf3b11	8.15889e-05	0.351962	0.447	0.293	1	Pos
srrm11	0.000154298	0.323178	0.377	0.234	1	Pos
clasp21	0.000177727	0.311915	0.251	0.138	1	Pos
sdha1	0.000188267	0.304986	0.397	0.251	1	Pos
tnip11	0.000242693	0.362966	0.347	0.213	1	Pos
ap1b11	0.000283245	0.284392	0.271	0.153	1	Pos
elof11	0.000364996	0.25048	0.508	0.364	1	Pos
atp6ap1a1	0.000407384	0.299275	0.322	0.191	1	Pos
29646	0.000467291	0.286661	0.286	0.183	1	Pos
selenot1a1	0.00127659	0.255362	0.367	0.239	1	Pos
ilf3b1	0.00198289	0.256936	0.281	0.178	1	Pos
zgc:928181	0.00224023	0.274459	0.281	0.169	1	Pos
ppp1cab1	0.00304965	0.253375	0.327	0.212	1	Pos
si:ch211-198a12.61	0.00416046	0.311097	0.291	0.186	1	Pos
rnf101	0.0044046	0.255384	0.472	0.346	1	Pos
larp4ab1	0.00460314	0.252762	0.362	0.246	1	Pos

## Sheet: lws1-lws2-specific transcripts
opn1lw1-.25		opn1lw2-.25
CT573282.1		si:ch211-113d22.2
si:busm1		unc119.2
ppp1r18		ppdpfa
cdc14aa		jakmip2
slc9a3r1a		CU571318.1
adarb1a		nfs1
nexn		si:ch211-63p21.1
aanat2		prpf8
si:zfos-943e10.1		nme3
cuedc1a		tcf12
mink1		elof1
tbc1d10aa		selenot1a
gcdha		ilf3b
sema4ab		si:ch211-198a12.6
ppp1r14bb
insra
lactbl1b
yipf3
dio3b
lin7c
atp11a
zgc:101566
uqcrc2a
pcyt2
tjp1b
kpna1
susd6
mdh2
chd9
lancl1
selenou1a
